# Supplementary material for: Cretaceous eutherians and Laurasian origin for placental mammals near the K/T boundary
Source: Springer Nature journal article supplement (doi:10.1038/nature05854), 2007-06-01
Supplement: 41586_2007_BFnature05854_MOESM452_ESM.pdf [file 41586_2007_BFnature05854_MOESM452_ESM.pdf]

Cretaceous Eutherians and Laurasian Origin for Placental Mammals  
near K-T Boundary

J. R. Wible<sup>1\*</sup>, G. W. Rougier<sup>2</sup>, M. J. Novacek<sup>3</sup> & R. J. Asher<sup>4</sup>

<sup>1</sup>Section of Mammals, Carnegie Museum of Natural History, Pittsburgh, Pennsylvania  
15206, USA

<sup>2</sup>Department of Anatomical Sciences and Neurobiology, School of Medicine, University  
of Louisville, Louisville, Kentucky 40292, USA

<sup>3</sup>Division of Paleontology, American Museum of Natural History, New York, New York  
10024, USA

<sup>4</sup>Museum of Zoology, Cambridge University, Cambridge CB2 3EJ, United Kingdom

\*Correspondence author: [wiblej@carnegiemnh.org](mailto:wiblej@carnegiemnh.org)

## Table of Contents

Part I. Full diagnosis of *Maelestes gobiensis* gen. et sp. nov.

Part II. Additional images of *Maelestes*

Part III. Character list and description of character states of *Maelestes*

Part IV. List of taxa and sources

Part V. Data matrix of 69 taxa and 408 characters

Part VI. TNT results

Part VII. Wilcoxon Rank Sum Tests

Part VIII. References

**Part I. Full diagnosis for *Maelestes gobiensis* gen. et sp. nov.**

Upper dentition: I?, C1, P5, M3. Lower dentition: i3, c1, p5, m3. No replacement teeth hidden in upper or lower jaws based on CT scanning. Upper incisors unknown and only part of upper canine alveolus preserved. P1 one root with one cusp. P2 two roots, larger than P1, crown broken. P3 smaller than P1, one root, crown broken. P4 three roots, tall, trenchant with one primary cusp (paracone) and lingual bulge (protocone). P5 three roots, molariform with one primary labial cusp (paracone), well-developed parastylar and metastylar lobes, protocone lower than paracone, and weak pre- and postcingulum. M1 much wider than long, narrow stylar shelf with parastylar lobe lingual to metastylar lobe and weak cusps A and B, metacone much lower than paracone but higher than narrow, procumbent protocone, metacone and paracone bases adjoined, paraconule and metaconule weak and nearer para- and metacone respectively, preparacingulum continuous between stylar margin and paraconule, postprotocrista does not extend labial to metacone, pre- and postcingulum but not extending labial to conules. M2 similar to M1 but with deeper ectoflexus and preparacingulum interrupted between stylar margin and paraconule. M3 without metastylar lobe, metacone relatively smaller than on M1 and M2, and pre- and postcingulum weaker than on M1 and M2. i1, i2, i3 subequal, procumbent, crowns broken with preserved tooth oval, roots closed and extend only to canine root. c1 large, still erupting with one open root. p1 one root, tiny, procumbent, peg-like. p2 two roots with primary cusp and small, unbasined heel with one cusp. p3 one root, larger than p1, crown broken. p4 with primary cusp, small, unbasined heel with one cusp, and nearly imperceptible anterior accessory cusp. p5 subequal in length to p4, with primary cusp, higher unbasined heel with one cusp, and nearly imperceptible anterior accessory cusp. m1 with anteroposteriorly compressed trigonid, protoconid lower than metaconid, protocristid transverse, paraconid anterolabial to metaconid and much lower, mesio-buccal cingular cuspule (f) with a distinct posteroventrally-directed shelf, talonid longer than trigonid but slightly narrower, cristid obliqua attaching at notch in protocristid, entoconid higher than hypoconid and connected to hypoconulid by high, nearly transverse crest. m2 similar to m1 but paraconid damaged, narrower talonid, cristid obliqua attaching lingual to notch in protocristid. m3 similar to m1 and m2 but narrower talonid, tall hypoconulid, more anterior entoconid not connected to hypoconulid by high crest.

*Maelestes gobiensis* differs from other Mongolian Djadokhta Formation eutherians - the asioryctitheres *Kennalestes* and *Asioryctes* (Kielan-Jaworowska, 1981), and *Ukhaatherium* (Novacek et al., 1997), and the zalambdalestids *Zalambdalestes* and *Barunlestes* (Kielan-Jaworowska and Trofimov, 1980, 1981; Kielan-Jaworowska, 1984a; Wible et al., 2004) - in having five upper and lower premolars, three subequal, procumbent lower incisors, a palatal vacuity between the maxilla and palatine, a postglenoid foramen behind the postglenoid process, a transpromontorial internal carotid artery, and a small prootic canal; differs from Central Asian Late Cretaceous

asioryctitheres *Bulaklestes*, *Daulestes*, and *Uchkudukodon* (Archibald and Averianov, 2006) in having five upper and lower premolars, single-rooted lower canine, penultimate upper premolar with three roots, upper molars much wider than long with narrower stylar shelves, and lower molars with protoconid subequal to metaconid; differs from Central Asian Late Cretaceous “zhelestids” – *Sheikhdzheilia* and *Eozhelestes* (Averianov and Archibald, 2005), *Aspanlestes*, *Zhelestes*, and *Parazhelestes* (Nessov et al., 1998; Archibald and Averianov, 2005) – and from North American and Central Asian Late Cretaceous *Paranyctoides* (Fox, 1979, 1984; Archibald and Averianov, 2001) in having upper molars with weak conules, metacone much smaller than paracone, and metacone and paracone with adjoined base, and lower molars with narrower talonids and no labial postcingulid; resembles North American Late Cretaceous cimolestids (Kielan-Jaworwska et al., 2004) *Cimolestes* (Lillegraven, 1969; Clemens, 1973) and *Batodon* (Lillegraven, 1969; Clemens, 1973; Wood and Clemens, 2001) in having lower canine and first lower premolar single-rooted; resembles *Cimolestes* (Lillegraven, 1969) in having subequal procumbent lower incisors (two preserved in *C. propalaeoryctes*); resembles *Batodon* (Lillegraven, 1969; Clemens, 1973; Wood and Clemens, 2001) in having upper molars with narrow stylar shelves and pre- and postcingula, and lower molars with a transverse protocristid and entoconid approximating hypoconulid; and differs from *Cimolestes* (Lillegraven, 1969; Clemens, 1973) and *Batodon* (Lillegraven, 1969; Clemens, 1973; Wood and Clemens, 2001) in having five upper and lower premolars, upper molars with weak conules, and lower molars with more compressed trigonids and protoconid subequal to metaconid.

Part II. Additional Images of *Maelestes*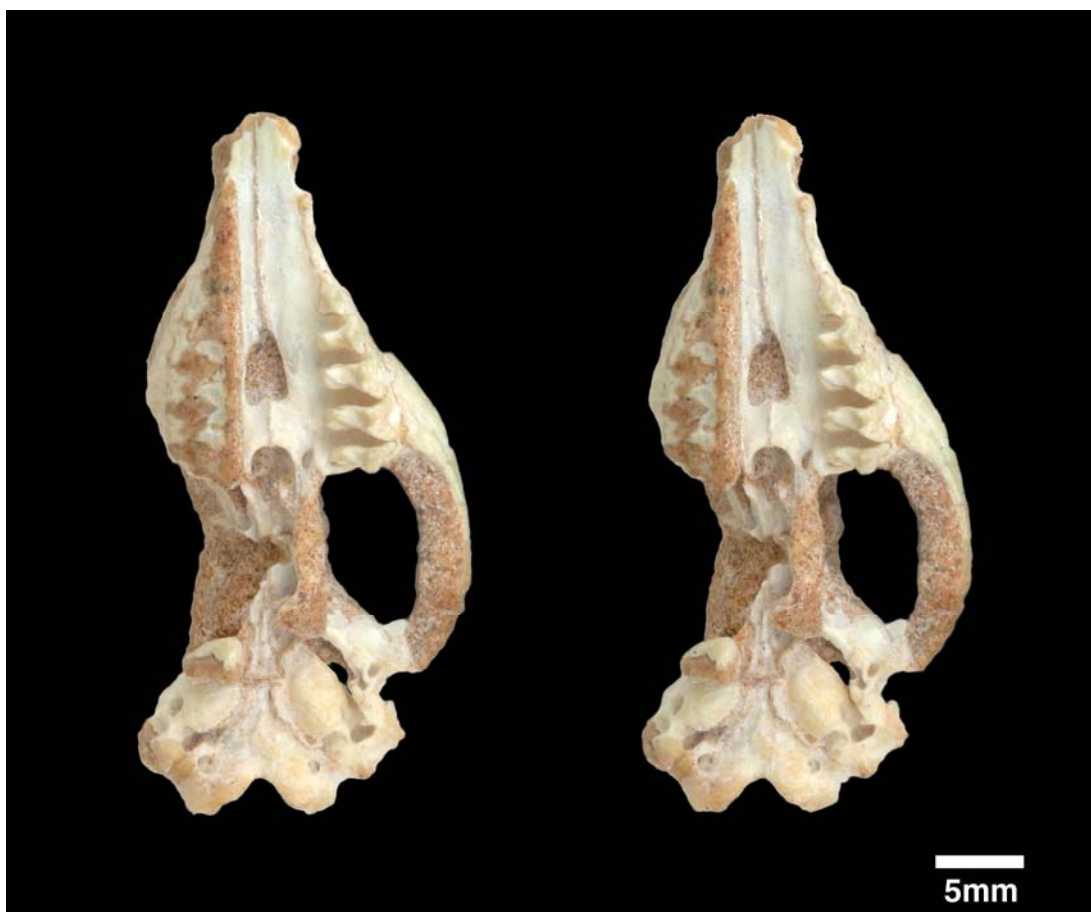

Supplementary Figure 1. *Maelestes gobiensis* PSS-MAE 607, stereophotograph of incomplete skull in ventral views. The palatine processes of the premaxillae are missing. On the left side of the mesocranium, matrix has been left to buttress the fragile entopterygoid process. The right ear region preserves part of the anterior crus of the ectotympanic.

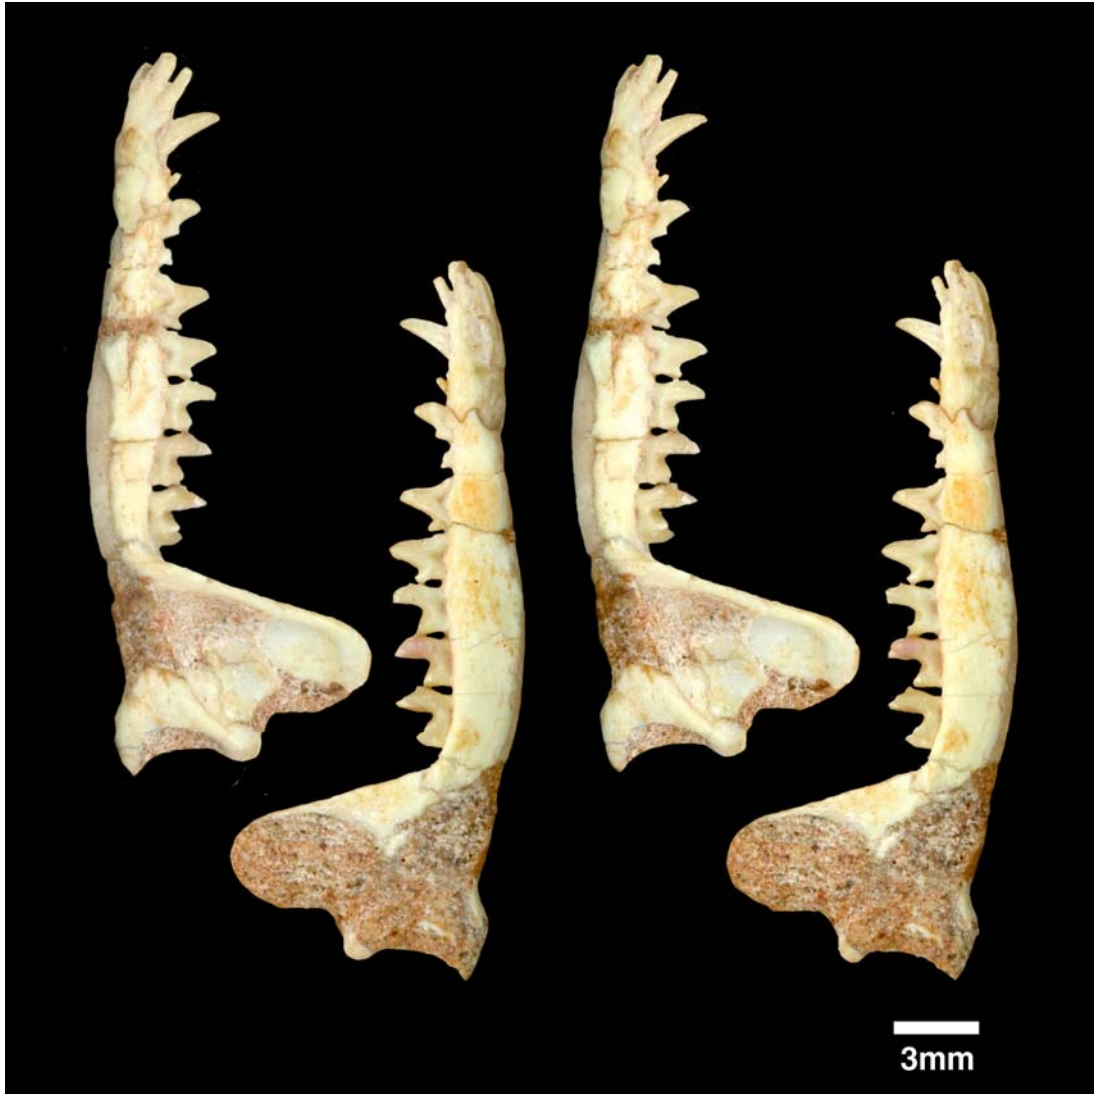

Supplementary Figure 2. *Maelestes gobiensis* PSS-MAE 607, stereophotographs of the left lower jaw in labial and lingual views.

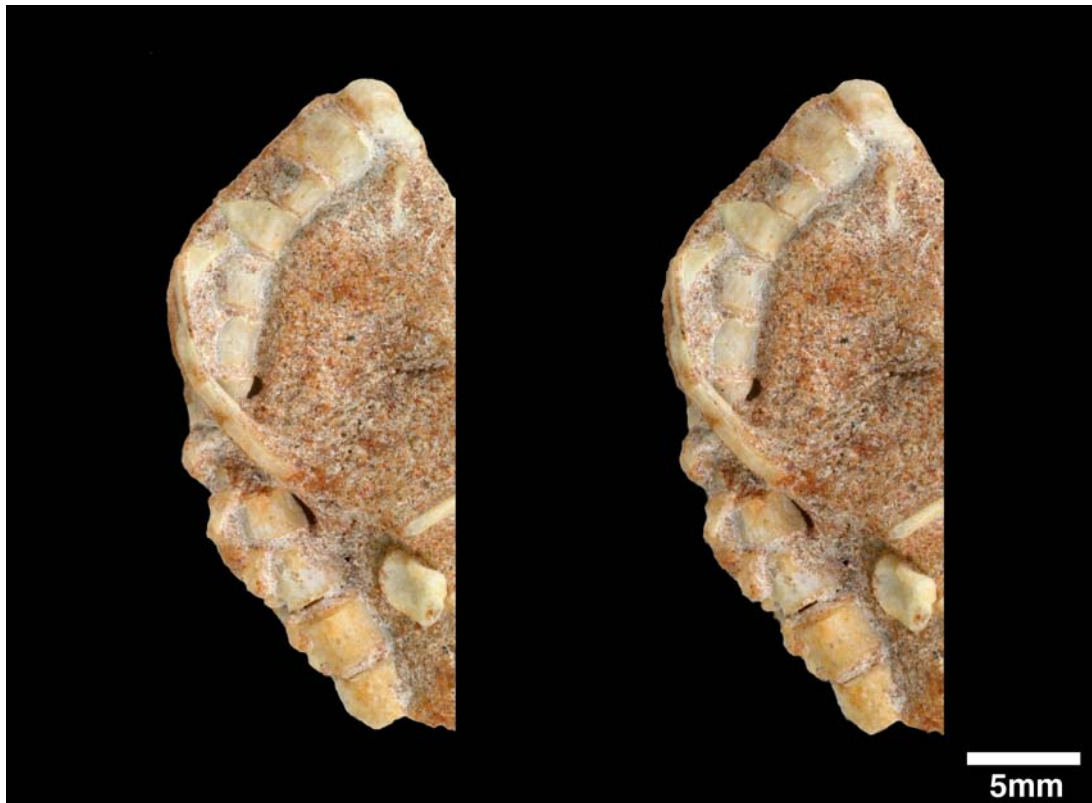

Supplementary Figure 3. *Maelestes gobiensis* PSS-MAE 607, stereophotograph of part of the main poscranial block showing on the left side of each pair the bodies of 12 thoracic vertebrae and several partial ribs, and on the bottom right of each pair part of the left clavicle and the proximal left ulna.

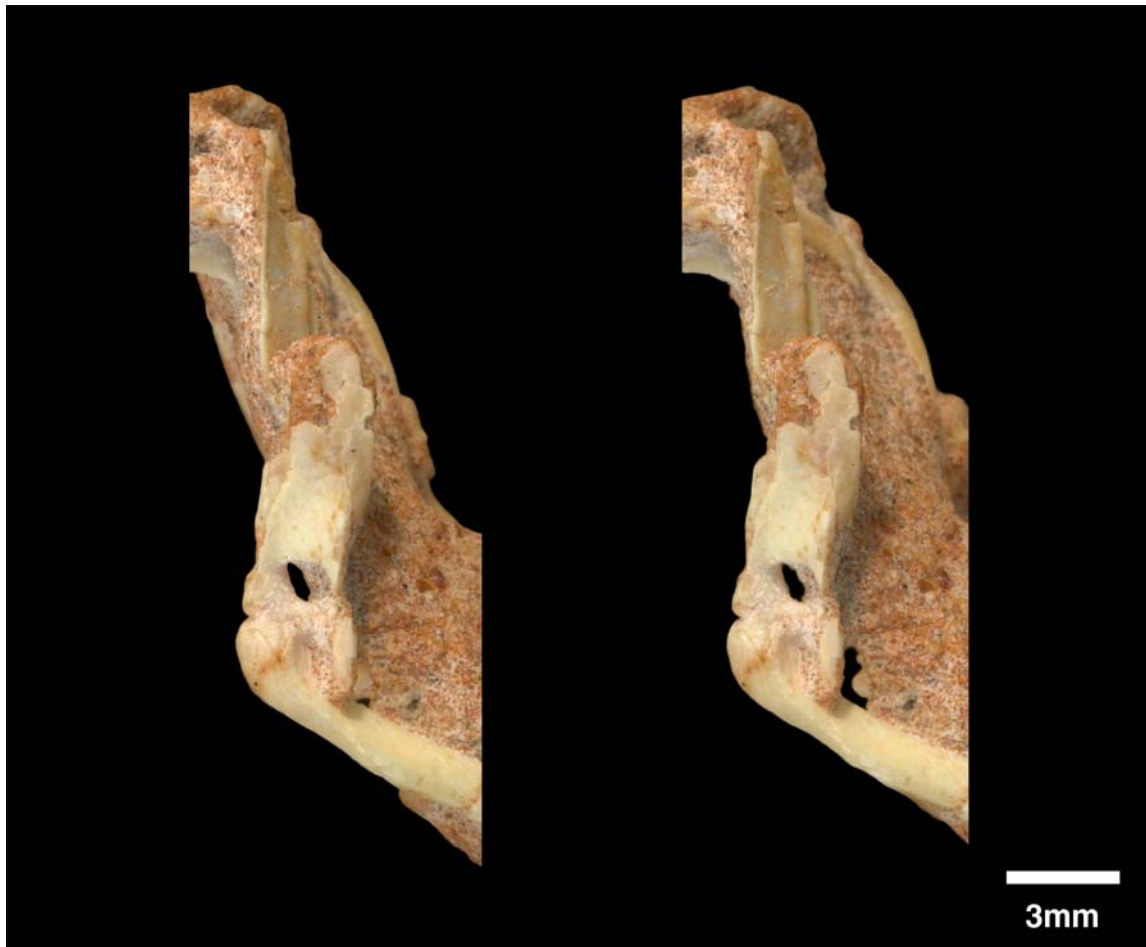

Supplementary Figure 4. *Maelestes gobiensis* PSS-MAE 607, stereophotograph of the broken left scapula and proximal humerus. Missing is the dorsal end of the supraspinous fossa, and the acromion and coracoid process are damaged. Matrix has not been removed from the ventral area of the infraspinous fossa to buttress the thin bone.



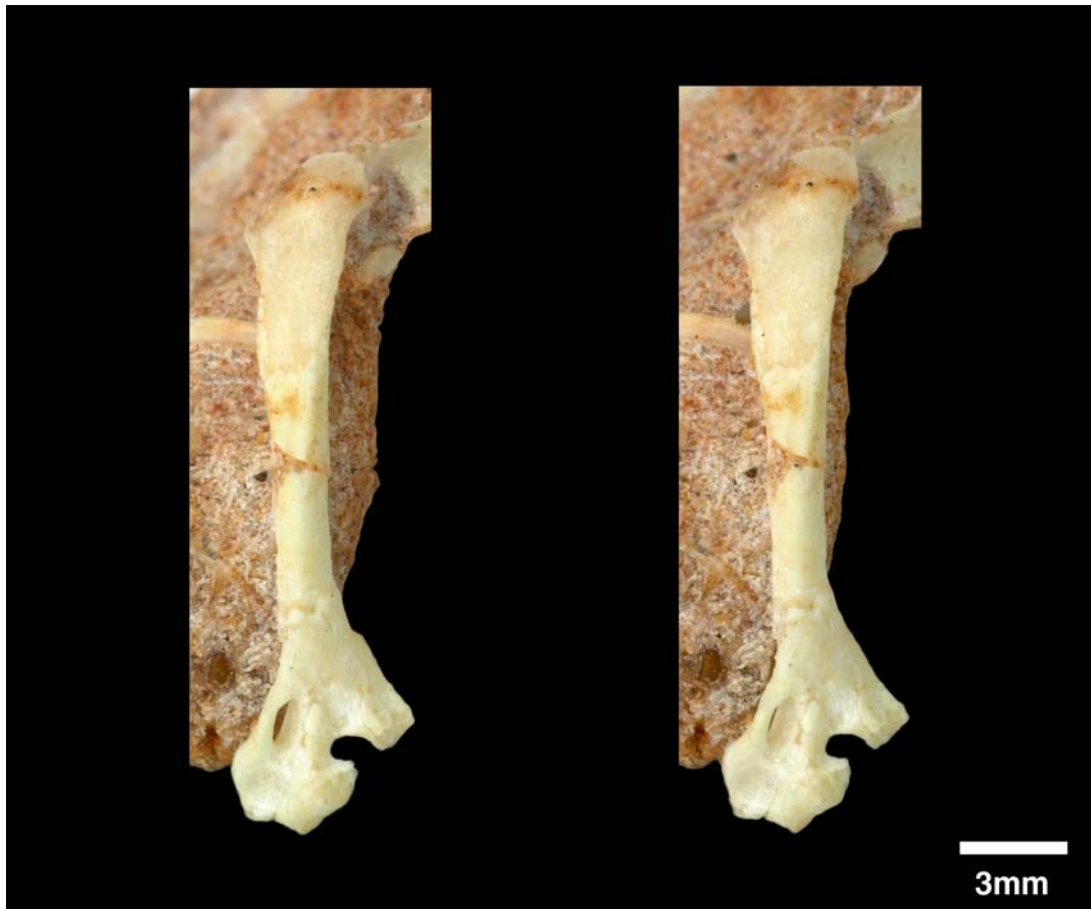

Supplementary Figure 5. *Maelestes gobiensis* PSS-MAE 607, stereophotograph of the nearly complete left humerus in anterior view. Distally, the lateral epicondyle and the capitulum are broken and preserved as an isolated piece (not shown) attached to the head and proximal body of the radius.

### Part III. Character list

Following most character descriptions is an appropriate reference to a phylogenetic analysis that employed that character, with the number after the colon representing the character number used in the reference. A character number with an asterisk denotes some modification to the cited source for the character. The character state for *Maelestes* is provided for each entry; numbers refer to the character state; “?” and “–” are unknown and non-applicable respectively; “/” is either/or and “+” is and.

#### Dentition – General

1. Teeth (Asher et al., 2003: 94\*) – present (0) or absent (1).

*Maelestes* (0).

*Tamandua* is the only taxon in the current matrix that completely lacks true teeth.

2. Teeth – differentiated into morphological types (incisors, canines, premolars, and molars) with enamel (0) or simple peg-like teeth without enamel (1).

*Maelestes* (0).

*Chaetophractus*, *Bradypus*, and *Orycteropus* have simple peg-like teeth without enamel. However, the Eocene armadillo *Utaetus* has enamel on some teeth (Simpson, 1932).

3. Number of postcanine tooth loci (Rougier et al., 1998: 7\*) – eight or more (0), seven (1), six (2), or five or less (3).

*Maelestes* (0).

4. Upper diastema – small, between incisors and canine (0), small, between canine and premolars (1), enlarged (2), or absent (3).

*Maelestes* (0/3): diastema is absent between canine alveolus and first premolar, but the condition anterior to the canine is unknown.

5. Lower diastema behind incisors (Meng et al., 2003: 84) – absent or small (0) or enlarged (1).

*Maelestes* (0).

#### Dentition – Incisors

6. Incisor shape (Asher et al., 2005: 3) – root and crown are straight and continuous in length (0) or form a continuous curve (1).

*Maelestes* (0).

7. Number of upper incisors (Luo and Wible, 2005: 136\*) – five (0), four (1), three (2), two (3), one (4), or none (5).

*Maelestes* (?).

8. Number of lower incisors (Luo and Wible, 2005: 135\*) – four (0), three (1), two, anterior positions (2), one (3), or none or posterior position(s) only (4).  
*Maelestes* (1).

9. Antermost upper incisor alveoli – approximating (0) or separated by a broad gap (1).  
*Maelestes* (?).

10. Antermost upper incisor size (Meng et al., 2003: 10\*) – small, subequal to subsequent (0), enlarged (1), or smaller than subsequent (2).  
*Maelestes* (?).

11. Antermost upper incisor shape – conical (0), mediolaterally compressed (1), anteroposteriorly compressed (2), cusped (one major and one minor) (3), or spatulate (4).  
*Maelestes* (?).

12. Antermost upper incisor growth (Asher et al., 2005: 52\*) – rooted (0), open rooted, in premaxilla only (1), or open rooted, extending into maxilla (2).  
*Maelestes* (?).

13. Antermost upper incisor enamel (Asher et al., 2005: 49) – surrounds tooth (0) or discontinuous posteriorly (1).  
*Maelestes* (?).

14. Ultimate upper incisor – in premaxilla (0), between maxilla and premaxilla (1), or in maxilla (2).  
*Maelestes* (?).

15. Antermost lower incisor size (Archibald et al., 2001: 28\*) – small, subequal to subsequent incisors (0), greatly enlarged (1), or tiny, smaller than subsequent (2).  
*Maelestes* (0).

Wible et al. (2004: 121) wrote: “Several authors have questioned the homologies of the enlarged lower incisors shared by *Zalambdalestes* and lagomorphs (and rodents). Both Lockett (1985) and Meng and Wyss (2001) have noted that the tooth in question in lagomorphs (and rodents) is the retained deciduous second incisor (Moss-Salentijn, 1978; Ooë, 1980; Lockett, 1985), whereas these authors scored the tooth in *Zalambdalestes* as the first incisor. The recent report of four lower incisors in [the zalambdalestid] *Kulbeckia* (Archibald et al., 2001; Archibald and Averianov, 2003) supports the latter interpretation. The primitive eutherian formula included four lower incisors (Rougier et al., 1998; Ji et al., 2002), the condition found in Early Cretaceous *Prokennalestes* (Sigogneau-Russell et al., 1992; personal obs.) and *Eomaia* (Ji et al., 2002) and in Late Cretaceous *Asioryctes* (Kielan-Jaworowska, 1975a) and *Ukhaatherium* (Novacek et al., 1997). *Zalambdalestes* (and *Barunlestes*) with a lower incisor count of three has lost one from the ancestral formula, but it is uncertain from which position. Consequently, the enlarged incisor in *Zalambdalestes* (and *Barunlestes*) could be either the first or second from the ancestral eutherian formula of four. However, *Kulbeckia* with four lower

incisors, with the enlarged one the first, supports that the enlarged tooth in *Zalambdalestes* (and *Barunlestes*) as [sic] the i1.” Despite this, we choose here to make no *a priori* assumptions regarding the homologies of the anteriormost lower incisor and code all mesialmost incisors for this character (and for characters 16-20).

16. Anteriormost lower incisor shape - conical (0), mediolaterally compressed (1), anteroposteriorly compressed (2), cuspsate (one major and one minor) (3) or spatulate (4). *Maelestes* (?).

17. Procumbent anteriormost lower incisor (Archibald et al., 2001: 29) – absent (0) or present (1). *Maelestes* (1).

18. Anteriormost lower incisor root (Asher et al., 2001: 32) – closed (0) or open (1). *Maelestes* (0).

19. Anteriormost lower incisor root length (Archibald et al., 2001: 32\*) – not extended posteriorly below p1 (0), extending posteriorly below p1 (1), extending posteriorly below penultimate or ultimate premolar (2), extending posteriorly below molars (3). *Maelestes* (0).

20. Anteriormost lower incisor enamel (Archibald et al., 2001: 30) – covers the whole incisor (0) or discontinuous posteriorly (1). *Maelestes* (?).

21. Procumbent posterior lower incisor(s) – absent (0) or present (1). *Maelestes* (1).

22. Staggered lower incisor (Rougier et al., 1998: 43) – absent (0) or present (1). *Maelestes* (?).

#### Dentition – Canine

23. Upper canine (Meng et al., 2003: 23) – present, large (0), present, small (1), or absent (2). *Maelestes* (0): based on the size of the alveolus.

24. Number of upper canine roots (Rougier et al., 1998: 10) – two (0) or one (1). *Maelestes* (0/1).

25. Lower canine (Meng et al., 2003: 25) – present, large (0), present, small (1), or absent (2). *Maelestes* (0).

26. Number of lower canine roots (Rougier et al., 1998: 44) – two (0) or one (1). *Maelestes* (1).

27. Procumbent lower canine – absent (0) or present (1).

*Maelestes* (0).

28. Deciduous canine (Rougier et al., 1998: 65) – present (0) or absent (1).

*Maelestes* (?).

#### Dentition – Premolars

29. Number of premolars (Luo and Wible, 2005: 145) – five or more (0), four (1), three (2), or two (3).

*Maelestes* (0).

This character is a simple count of premolar number and does not assume homology of tooth position. Several subsequent characters, however, assume homology of premolar tooth position. Our basis for assigning homologies follows:

It is now generally accepted (e.g., Novacek, 1986b; Cifelli, 2000; Archibald et al., 2001) that the primitive premolar count in eutherians is five. Among Early Cretaceous eutherians, five upper and lower premolars occur in *Eomaia*, at 125 million years the oldest eutherian (Ji et al., 2003), and five lowers are known for *Prokennalestes* (Kielan-Jaworowska and Dashzeveg, 1989; Sigogneau-Russell et al., 1992) and *Bobolestes* (Averianov and Archibald, 2005). Among Late Cretaceous eutherians, five upper and lowers are known for *Zhelestes* and *Aspanlestes*, although not in association (Nessov et al., 1998; Archibald et al., 2001; Archibald, pers. comm.), and five lowers are known for *Paranyctoides* (Archibald and Averianov, 2001), *Eozhelestes* (Averianov and Archibald, 2005), *Parazhelestes* (Archibald et al., 2001; Archibald, pers. comm.), *Zhangolestes* (Zan et al., 2005), and some *Gypsonictops* (Lillegraven, 1969; Clemens, 1973; Fox, 1979) with the small middle tooth missing in some mandibles. In addition, five upper premolars occur in a juvenile *Kennalestes*, but not in the adult (Kielan-Jaworowska, 1981) with the middle one missing.

In the Late Cretaceous taxa with five premolar loci, the usual pattern is to have the middle one the smallest and the first the next smallest. Because of this and the lost middle tooth in *Gypsonictops* and *Kennalestes*, it is generally held (e.g., Lockett, 1993; Archibald et al., 2001) that eutherians with four premolars have lost the middle one of the ancestral five. We follow that model of reduction here. In taxa with five, we identify the teeth as P1, P2, P3, P4, P5 for the uppers and p1, p2, p3, p4, p5 for lowers. In taxa with four, we identify the teeth as P1, P2, P4, P5 and p1, p2, p4, p5.

Because the first premolar of five is the next smallest and is usually the smallest in eutherians with four, we follow that model of reduction, i.e., the loss of the first, for most eutherians with three, identifying the teeth as P2, P4, P5 and p2, p4, p5. However, within zalambdalestids, the p2 is lost in *Barunlestes* and some *Zalambdalestes*, whereas the p1 is retained (Kielan-Jaworowska, 1975b; Wible et al., 2004).

The metatherians scored in our analysis, and nearly all metatherians, have three premolars and four molars. Reconciling this formula with the five premolars and three molars of Cretaceous eutherians is problematic, especially because deciduous dentitions are not known for the vast majority of fossils (Lockett, 1993). A possible transitional form from the Early Cretaceous with four upper premolars and three lowers, *Sinodelphys*, has been described (Luo et al., 2003), but the specimen was not available to us for study. Until we have the opportunity to study that form with regards to the homologies of postcanine loci, we have not attempted to homologize the metatherian and eutherian postcanine dentitions.

30. Replacement of dP1/dp1 and dP2/dp2 (Rougier et al., 1998: 66) – present (0) or absent (1).

*Maelestes* (?).

31. Tall, trenchant premolar (Rougier et al., 1998: 3) – ultimate premolar (0), penultimate premolar (1), or absent (2). [Upper dentition considered when possible]

*Maelestes* (1).

32. Procumbent first upper premolar (Luo and Wible, 2005: 151\*) – absent (0) or present (1).

*Maelestes* (0).

33. First upper premolar roots – two (0), one (1), or three (2).

*Maelestes* (1).

34. Diastema posterior to first upper premolar (Luo and Wible, 2005: 43) – absent (0) or present (1).

*Maelestes* (0).

35. Third upper premolar roots (only scored for taxa with five upper premolars) – two (0) or one (1).

*Maelestes* (1).

36. Penultimate upper premolar protocone (Rougier et al., 1998: 12) – absent (0), small lingual bulge (1), or with an enlarged basin (2).

*Maelestes* (1).

37. Penultimate upper premolar metacone – absent (0), swelling (1), or large (2).

*Maelestes* (0).

38. Penultimate upper premolar parastylar lobe – absent or small (0) or well developed (1).

*Maelestes* (0).

39. Penultimate upper premolar roots (Rougier et al., 1998: 13\*) – two (0), three (1), one (2), or four (3).  
*Maelestes* (1).
40. Ultimate upper premolar protocone (Rougier et al., 1998: 14\*) – absent or narrow cingulum (0), shorter than paracone (1), or approaches paracone in height (2).  
*Maelestes* (1).
41. Ultimate upper premolar metacone (Luo and Wible, 2005: 39) – absent (0), swelling (1), or large (2).  
*Maelestes* (0).
42. Ultimate upper premolar para- and metastylar lobes – absent or insignificant (0), subequal (1), parastylar lobe larger (2), or metastylar lobe larger (3).  
*Maelestes* (2).
43. Ultimate upper premolar precingulum – absent (0) or present (1).  
*Maelestes* (1).
44. Ultimate upper premolar postcingulum – absent (0), present, lower than protocone (1), or present, level with protocone (2).  
*Maelestes* (1).
45. Ultimate upper premolar conules – weak or absent (0) or prominent (1).  
*Maelestes* (0).
46. Ultimate upper premolar size (occlusal surface) relative to first upper molar (Meng et al., 2003: 41) – smaller or subequal (0) or larger (1).  
*Maelestes* (0).
47. First lower premolar orientation (Rougier et al., 1998: 45) – in line with jaw axis (0) or oblique (1).  
*Maelestes* (0).
48. First lower premolar roots – two (0) or one (1).  
*Maelestes* (1).
49. Diastema separating first and second lower premolars (Luo and Wible, 2005: 152\*) – absent (gap less than one tooth root for whichever is smaller of adjacent teeth) (0) or present, subequal to one tooth-root diameter or more (1).  
*Maelestes* (1).
50. Third lower premolar size to second (only scored for taxa with five lower premolars) – longer (0) or shorter (1).  
*Maelestes* (1).

51. Third lower premolar roots (only scored for taxa with five lower premolars) – two (0) or one (1).

*Maelestes* (1).

52. Penultimate lower premolar paraconid (Luo and Wible, 2005: 52) – indistinctive or absent (0) or present and distinctive (1).

*Maelestes* (0).

53. Penultimate lower premolar metaconid – absent (0), swelling (1), or separate from protoconid (2).

*Maelestes* (0).

54. Penultimate lower premolar talonid cusps – one (0), two (1), or three (2).

*Maelestes* (0).

55. Ultimate lower premolar paraconid (Luo and Wible, 2005: 45) – indistinctive or absent (0), distinctive but low (1), or distinctive and high (2).

*Maelestes* (0).

56. Ultimate lower premolar metaconid – absent (0), swelling (1), or large (2).

*Maelestes* (0).

57. Ultimate lower premolar talonid (Archibald and Averianov, 2006: 25) – narrower than anterior portion of crown (0) or as wide as anterior portion of crown (1).

*Maelestes* (0).

58. Ultimate lower premolar talonid cusps – one (0), two (1), or three (2).

*Maelestes* (0).

59. Length of ultimate lower premolar to penultimate (Archibald and Averianov, 2006: 24) – longer (0) or equal to or less (1).

*Maelestes* (1).

60. Ultimate lower premolar anterolingual cingulid – absent (0) or present (1).

*Maelestes* (0).

#### Dentition – Molars

Unless noted in the character description, molar features are scored for the penultimate molar when available.

61. Number of molars (Rougier et al., 1998: 4\*) – four or more (0), three (1), or two (2).

*Maelestes* (1).



62. Size of molar series (Rougier et al., 1998: 6\*) – subequal (0), posterior increase (1), or posterior decrease (1). [All molars considered in lower jaw, and all but the last considered in upper jaw]

*Maelestes* (0).

63. Molar cusp form (Rougier et al., 1998: 5\*) – sharp, gracile (0), inflated, robust (1), or crest-like (2).

*Maelestes* (0).

64. Upper molar shape (Rougier et al., 1998: 15\*) – as long as wide, or longer (0), wider than long (length more than 75% but less than 99% of width) (1), or much wider than long (length less than 75% of width) (2).

*Maelestes* (2).

65. Size (labiolingual width) of upper molar labial styler shelf at maximum – 50% or more of total transverse width (0), less than 50% but more than 25% (1), less than 25% (2), or absent (3).

*Maelestes* (2).

66. Labial extent of parastylar and metastylar lobes (Archibald and Averianov, 2006: 8\*) – parastylar lobe more labial (0), subequal (1), metastylar lobe more labial (2), or lobes absent (3).

*Maelestes* (2).

67. M1 parastylar lobe relative to paracone (Archibald and Averianov, 2006: 7) – parastylar lobe is anterolabial to paracone (0) or parastylar lobe is anterior to paracone (1). [Taxa scored with lobes absent on character 66 are scored inapplicable here.]

*Maelestes* (1).

68. Length of parastylar lobe (measured to stylocone or stylocone position) relative to total length on penultimate molar – more than 30% (0), less than 30% but more than 20% (1), or 20% or less (2).

*Maelestes* (0).

69. Preparastyle (Rougier et al., 1998: 21) – absent (0) or present (1).

*Maelestes* (0).

70. Stylar cusp A (Rougier et al., 1998: 20\*) – subequal to larger than B (0), distinct, but smaller than B (1), or vestigial to absent (2).

*Maelestes* (2).

71. Stylar cusp B relative to paracone (Rougier et al., 1998: 22) – smaller but distinctive (0), vestigial to absent (1), or subequal (2).

*Maelestes* (1).

72. Styolar cusp C, mesostyle (Rougier et al., 1998: 23) – absent (0) or present (1).  
*Maelestes* (0).
73. Styolar cusp D (Rougier et al., 1998: 24) – absent (0), smaller or subequal to B (1), or larger than B (2).  
*Maelestes* (0).
74. Styolar cusp E (Rougier et al., 1998: 25) – directly lingual to D or D-position (0), distal to D (1), or small to indistinct (2).  
*Maelestes* (2).
75. Preparacingulum (Rougier et al., 1998: 26\*) – absent (0), interrupted between styolar margin and paracone or paracone position (1), or continuous (2).  
*Maelestes* (1).
76. Deep ectoflexus (Rougier et al., 1998: 19) – present only on penultimate molar (0), on penultimate and preceding molars (1), or strongly reduced or absent (2).  
*Maelestes* (0).
77. Metacone size relative to paracone (Rougier et al., 1998: 27\*) – noticeably smaller (0), slightly smaller (1), subequal or larger (2), or absent or merged with paracone.  
*Maelestes* (0).
78. Metacone position relative to paracone (Rougier et al., 1998: 28) – labial (0), approximately at same level (1), or lingual (2).  
*Maelestes* (1).
79. Metacone and paracone bases (Rougier et al., 1998: 30) – adjoined (0) or separated (1).  
*Maelestes* (0).
80. Preparacrista – strong, from side of paracone to stylocone (0) or weak, from base of paracone, or absent (1).  
*Maelestes* (1).
81. Cuspate preparacrista – present (0) or absent (1).  
*Maelestes* (1).
82. Centrocrista (Rougier et al., 1998: 31\*) – straight (0), V-shaped (1), or absent (2).  
*Maelestes* (0).
83. Postmetacrista (Luo and Wible, 2005: 118\*) – prominent, from side of metacone to metastyle (0), salient (1), or weak, from base of metacone, or absent (2).

*Maelestes* (0).

84. Cuspate postmetacrista – present (0) or absent (1).

*Maelestes* (1).

85. Preprotocrista (Rougier et al., 1998: 33\*) – does not (0), does (1) extend labially passed base of paracone (double rank prevallum/postvallid shearing), or absent (2).

*Maelestes* (0).

86. Postprotocrista – extends to mid-lingual surface of metacone (0), extends distal to metacone (1), or absent (2).

*Maelestes* (1).

87. Development of postvallum shear (Luo and Wible, 2005: 57\*) - present but only by the first rank: postmetacrista (0), present, with the addition of a second rank (postprotocrista below postmetacrista) but the second rank does not reach labially below the base of the metacone (1), present, with second rank extending to metastylar lobe: metacingulum (2), or absent (3).

*Maelestes* (1).

88. Paraconule – weak or absent (0), prominent, closer to protocone (1), or prominent, midway or closer to paracone (2).

*Maelestes* (0).

89. Metaconule – weak or absent (0), prominent, closer to protocone (1), or prominent, midway or closer to metacone (2).

*Maelestes* (0).

90. Internal conular cristae (Luo and Wible, 2005: 107) – indistinct (0) or distinctive and wing-like (1). [Taxa without prominent conules are scored inapplicable.]

*Maelestes* (-).

91. Anteroposterior width of conular region (with or without conules) (Luo and Wible, 2005: 104) – narrow (anteroposterior distance less than 0.30 of total tooth length) (0), moderate development (distance = 0.31–0.50 of total tooth length) (1), or wide (distance greater than 0.51 of total tooth length) (2).

*Maelestes* (1).

92. Protocone (Rougier et al., 1998: 36\*) – lacking (0), small, without trigon basin (1), or with distinct trigon basin (2).

*Maelestes* (2).

93. Protocone antero-posterior expansion (Archibald et al., 2001: 23\*) – none, subequal to paracone (0) or expanded, larger than paracone (1).

*Maelestes* (0).

94. Protocone procumbency (Rougier et al., 1998: 37) – absent (0) or present (1).

*Maelestes* (1).

95. Degree of labial shift of protocone (distance from protocone apex to lingual border vs. total tooth width, in %) (Luo and Wible, 2005: 97\*) – no labial shift (10%-20%) (0), moderate labial shift (21%-30%) (1), or substantial labial shift ( $\geq$  31%) (2).

*Maelestes* (0).

96. Protocone height (Rougier et al., 1998: 38\*) – low (0), tall, approaching paracone and metacone (1), or subequal (2).

*Maelestes* (0).

97. Precingulum – absent or weak (0), present (1), or present, reaching labially passed the paraconule or paraconule position (2).

*Maelestes* (1).

98. Postcingulum (Luo and Wible, 2005: 58\*) – absent or weak (0), present, lingual to metaconule or metaconule position (1), present, reaching labially passed metaconule or metaconule position (2), or present, extending to labial margin (3).

*Maelestes* (1).

99. Hypocone on postcingulum – absent (0), present, lower than protocone (1), or present, subequal to protocone (2).

*Maelestes* (0).

100. Pre- and postcingulum – separated (0) or continuous lingually (1).

[Taxa without pre- and postcingulum are scored inapplicable.]

*Maelestes* (0).

101. Number of roots – three (0), four (1), or more (2).

*Maelestes* (0).

102. Number of roots on ultimate molar – three (0), two (1), one (2), or four or more (3).

*Maelestes* (0).

103. Lingual root position on upper molars (Rougier et al., 1998: 40) – supporting paracone (0) or supporting trigon (1).

*Maelestes* (1).

104. Ultimate upper molar width relative to penultimate molar (Rougier et al., 1998: 41) – subequal (0) or smaller (1).

*Maelestes* (0).

105. Metastylar lobe on ultimate molar – absent (0) or present (1).

*Maelestes* (0).

106. Paraconid (Meng et al., 2003: 77\*) – present (0) or absent (1).

*Maelestes* (0).

107. Paraconid height relative to metaconid (Rougier et al., 1998: 60) – shorter (0), subequal (1), or taller (2).

*Maelestes* (0).

108. Paraconid on lingual margin (Luo and Wible, 2005: 89\*) – absent (0) or present (1).

*Maelestes* (0).

109. Mesiolingual vertical crest of paraconid (Luo and Wible, 2005: 77) – rounded (0) or keeled (1).

*Maelestes* (0).

110. Paracristid – notched (0) or continuous curve without notch (1).

*Maelestes* (0).

111. Trigonid configuration (Rougier et al., 1998: 48\*) – open, with paraconid anteromedial, paracristid-protocristid angle more than 50° (0), more acute, with paraconid more posteriorly placed, paracristid-protocristid angle between 36 and 49° (1), or anteroposteriorly compressed, paracristid-protocristid angle 35° or less (2). [Taxa lacking a paraconid are scored inapplicable.]

*Maelestes* (2).

112. Protoconid height (Rougier et al., 1998: 59\*) – tallest cusp on trigonid (0), subequal to para- and/or metaconid (1), or smaller than para- and/or metaconid (2).

*Maelestes* (1).

113. Protocristid orientation (Rougier et al., 1998: 57\*) – oblique (0) or transverse (1).

*Maelestes* (1).

114. Anterior and labial (mesio-buccal) cingular cuspule (f) (Luo and Wible, 2005: 67\*) – present (0), present with a distinct cingular shelf posteroventrally directed from it (1), present with shelf continuing along buccal border (2), or absent (3).

*Maelestes* (1).

115. Talonid (Rougier et al., 1998: 49) – small heel (0) or multicusped basin (1).

*Maelestes* (1).

116. Cristid obliqua (Rougier et al., 1998: 51\*) – incomplete, with distal metacristid present (0), complete, attaching lingual to notch in protocristid (1), complete, attaching labial to notch in protocristid (2), complete, attaching below middle posterior of protoconid (3), or complete, labially placed (4).

*Maelestes* (1).

117. Trigonid height relative to talonid height (Archibald and Averianov, 2006: 28\*) – twice or more (0), less than twice (1), or subequal (2).

*Maelestes* (0).

118. Anteroposterior shortening at base of trigonid relative to talonid (Luo and Wible, 2005: 78) – trigonid long (more than 75% of tooth length) (0), some shortening (50-75% of tooth length) (1), or anteroposterior compression of trigonid (less than 50% of tooth length) (2).

*Maelestes* (2).

119. Talonid width relative to trigonid (Rougier et al., 1998: 50) – very narrow, subequal to base of metaconid (0), narrower (1), or subequal to wider (2).

*Maelestes* (1).

120. Hypoconulid (Rougier et al., 1998: 52\*) – absent (0), in posteromedial position (near the mid-point of transverse talonid width) (1), linguallly placed with slight approximation to entoconid (2), or close approximation to entoconid (3).

*Maelestes* (2).

121. Hypoconulid of ultimate molar (Rougier et al., 1998: 53\*) – short and erect (0), tall and sharply recurved (1), posteriorly procumbent (2), or absent (3).

*Maelestes* (1).

122. Entoconid (Rougier et al., 1998: 54) – absent (0), smaller than (1), or subequal to larger than hypoconid and/or hypoconulid (2).

*Maelestes* (2).

123. Postcristid (between entoconid and hypoconulid) taller than hypoconulid and nearly transverse – absent (0) or present (1).

*Maelestes* (1).

124. Mesoconid (Meng et al., 2003: 79) – absent (0) or present (1).

*Maelestes* (0).

125. Hypolophid (Meng et al., 2003: 82) – absent (0) or present (1).

*Maelestes* (0).

126. Labial postcingulid (Rougier et al., 1998: 55) – absent (0) or present (1).

*Maelestes* (0).

127. Ultimate lower molar size relative to penultimate lower molar (Rougier et al., 1998: 61) – subequal or larger (0) or smaller (1).

*Maelestes* (0).

#### Mandible

128. Number of mental foramina (Meng et al., 2003: 87) – two or more (0) or one (1).

*Maelestes* (0).

129. Anteriormost mental foramen (Archibald et al., 2001: 58\*) – below incisors (or anteriormost mandible) (0), below p1 (1), below p2 (2), or more posterior (3).

*Maelestes* (2).

130. Posteriormost mental foramen (Luo and Wible, 2005: 25\*) – in canine and anterior premolar (premolariform) region (in saddle behind canine eminence of mandible) (0), below penultimate premolar (under anterior end of functional postcanine row) (1), below ultimate premolar (2), or at ultimate premolar and first molar junction or more posterior (3). [Taxa with only one mental foramen are scored inapplicable]

*Maelestes* (3).

131. Depth of mandibular body (Meng et al., 2003: 86) – slender and long (0) or deep and short (1).

*Maelestes* (0).

132. Space between ultimate molar and coronoid process – absent (0) or present (1).

*Maelestes* (1).

133. Coronoid process height – higher than condyle (0) or even with condyle (1).

*Maelestes* (0).

134. Coronoid process width – broad, roughly two molar lengths (0), narrow, subequal to or less than one molar length (1).

*Maelestes* (0).

135. Tilting of coronoid process (measured as angle between anterior border of coronoid process and horizontal alveolar line of all molars) (Luo and Wible, 2005: 32) – strongly reclined and angle obtuse ( $\geq 150^\circ$ ) (0), less reclined ( $135^\circ$ - $145^\circ$ ) (1), less than vertical ( $110^\circ$ - $125^\circ$ ) (2), near vertical ( $95^\circ$  to  $105^\circ$ ) (3), or tilted anteriorly (4).

*Maelestes* (2).

136. Coronoid crest (Luo and Wible, 2005: 21\*) – absent or weakly developed (0) or present and laterally flaring (1).

*Maelestes* (0).

137. Ventral border of masseteric fossa (Luo and Wible, 2005: 20\*) – absent (0), present as a low and broad crest (more than half the height of mandibular ramus) (1), or present as a well-defined and thin crest (less than half the height of the mandibular ramus) (2).

*Maelestes* (2).

138. Anteroventral extension of masseteric fossa (Luo and Wible, 2005: 22\*) – absent (0) or extending anteriorly onto mandibular body (1).

*Maelestes* (0).

139. Labial mandibular foramen (Rougier et al., 1998: 70) – absent (0) or present (1).

*Maelestes* (1).

140. Condylloid crest – absent (0) or present (1).

*Maelestes* (1).

141. Posterior shelf of masseteric fossa (Rougier et al., 1998: 68) – absent (0) or present (1).

*Maelestes* (0).

142. Angular process – process on posterior aspect of mandibular ramus (0) or shelf along ventral border of mandibular ramus (1).

*Maelestes* (0).

143. Angular process orientation (Rougier et al., 1998: 73\*) – posteriorly directed (0), medially inflected (1), posteroventrally directed (2), or posterodorsally directed (3).

*Maelestes* (2).

144. Angular process length – less than mandibular ramus length (0) or equal or greater than mandibular ramus length (1).

*Maelestes* (0).

145. Angular process shape – tapers, base wider than tip (0) or rounded, base as wide as tip (1).

*Maelestes* (0).

146. Angular process vertical position (Luo and Wible, 2005: 9) – at posteroventral border of mandible (0) or posterodorsal, at or near the alveolar border (1).

*Maelestes* (0).



147. Root of angular process relative to condylar process (Luo and Wible, 2005: 8\*) – level with or posterior to (0) or anterior to (1).  
*Maelestes* (0).
148. Condylar process – with posteriorly directed peduncle (0) or not (1).  
*Maelestes* (1).
149. Condyle shape (Rougier et al., 1998: 71\*) – ovoid (0), cylindrical (1), or anteroposteriorly elongate (2).  
*Maelestes* (0).
150. Condyle position relative to tooth row (Luo and Wible, 2005: 31\*) – at about same level (0), slightly above (1), or above by more than molar length (2).  
*Maelestes* (2).
151. Mandibular symphysis shape (Meng et al., 2003: 86) – tapered (0) or deep (1).  
*Maelestes* (0).
152. Mandibular symphysis posterior extent – p1 or more anterior (0), p2 (1), or p3 or more posterior (2).  
*Maelestes* (0).
153. Mandibular symphysis (Luo and Wible, 2005: 36) – mobile (0) or fused (1).  
*Maelestes* (0).
154. “Meckelian” groove (Rougier et al., 1998: 75) – present (0) or absent (1).  
*Maelestes* (1).
155. Curvature of “Meckelian” groove (under tooth row) (applicable only to taxa with “Meckelian” groove) (Luo and Wible, 2005: 5) – parallel to (0) or convergent on ventral border of mandible (1).  
*Maelestes* (-).
156. “Coronoid” facet (Rougier et al., 1998: 76) – present (0) or absent (1).  
*Maelestes* (1).
157. Vertical position of mandibular foramen – anteriorly placed, near back of dentition (0), near ventral margin, at root of angle (1), recessed dorsally from ventral margin, but below alveolar plane (2), or recessed dorsally from ventral margin, at or above alveolar plane (3).  
*Maelestes* (?).
158. Mandibular foramen dorsal to prominent longitudinal ridge – present (0) or absent (1).

*Maelestes* (?).

#### Skull – Rostrum

159. Septomaxilla (Rougier et al., 1998: 78) – present (0) or absent (1).

*Maelestes* (?).

160. Premaxilla, facial process dorsal extent (Rougier et al., 1998: 80) – does not (0) or does reach nasal (1).

*Maelestes* (1).

161. Premaxilla, facial process posterior extent (Luo and Wible, 2005: 406) – does not extend beyond canine (0), extends beyond canine but does not contact frontal (1), or extends beyond canine and contacts frontal (2).

*Maelestes* (1).

162. Premaxilla, facial process with distinct finger-like posterodorsal process – present (0) or absent (1).

*Maelestes* (0).

163. Lateral margin of paracanine fossa (Rougier et al., 1998: 81) – formed by maxilla (0) or maxilla and premaxilla (1).

*Maelestes* (0).

164. Exit(s) of infraorbital canal (Rougier et al., 1998: 82\*) – multiple (0), single (1), or canal absent (2).

*Maelestes* (1).

165. Infraorbital foramen position (Geisler, 2001: 65\*) – dorsal to ultimate premolar (0), to penultimate premolar or more anterior (1), or to first molar or more posterior (2). [Taxa without an infraorbital canal are scored inapplicable.]

*Maelestes* (1).

166. Infraorbital canal length (Asher et al., 2005: 95\*) – long (more than one molar length) (0) or short (less than one molar length (1). [Taxa without an infraorbital canal are scored inapplicable.]

*Maelestes* (0).

167. Flaring of cheeks behind infraorbital foramen, as seen in ventral view (Rougier et al., 1998: 83) – present (0) or absent (1).

*Maelestes* (0).

168. Nasal (Asher et al., 2005: 110\*) – widest posteriorly (0), sides sub-parallel (1), or widest anteriorly (2).

*Maelestes* (?).

169. Nasal overhangs external nasal aperture – present (0) or absent (1).  
*Maelestes* (?).
170. Naso-frontal suture with medial process of frontals wedged between nasals (Rougier et al., 1998: 84) – present (0) or absent (1).  
*Maelestes* (0).
171. Naso-frontal suture position (Geisler, 2001: 67\*) – posterior to or even with (0) or anterior to anterior orbital rim (1).  
*Maelestes* (0).
172. Nasal foramina (Rougier et al., 1998: 85) – present (0) or absent (1).  
*Maelestes* (?).
173. Frontal-maxillary contact on rostrum (Rougier et al., 1998: 86) – absent (0) or present (1).  
*Maelestes* (?).
174. Maxillary process of frontal (anterior projection of frontal) (Asher et al., 2005: 109\*) – weak or absent (0) or elongate and thin (1).  
*Maelestes* (?).
175. Preorbital length relative to postorbital (Rougier et al., 1998: 90\*) – less than one third total length (0) or more than one third (1).  
*Maelestes* (1).
176. Lacrimal (Asher et al., 2005: 103) – present (0) or absent (1).  
*Maelestes* (0).
177. Facial process of lacrimal (Asher et al., 2005: 105) – large, triangular and pointed anteriorly (0) or small, rectangular or crescentic (1). [Taxa without lacrimal are scored inapplicable.]  
*Maelestes* (?).
178. Lacrimal tubercle (Rougier et al., 1998: 87) – present (0) or absent (1). [Taxa without lacrimal scored are inapplicable.]  
*Maelestes* (?).
179. Lacrimal foramen exposed on face (Rougier et al., 1998: 88) – present (0) or absent (1).  
*Maelestes* (1).
180. Lacrimal foramen number (Rougier et al., 1998: 89) – two (0) or one (1).  
*Maelestes* (0).
181. Lacrimal foramen within lacrimal (Asher et al., 2003: 100\*) – present (0) or absent, with maxillary contribution (1), or absent, with jugal contribution (2).  
*Maelestes* (0).

182. Translacrimal canal – absent (0) or present (1). [Taxa without lacrimal are scored inapplicable.]  
*Maelestes* (0).

#### Skull – Palate

183. Premaxilla, palatal process (Rougier et al., 1998: 79) – does not (0) or does reach nearly or to canine alveolus (1).  
*Maelestes* (?).

184. Premaxillary-maxillary suture on palate – transverse (0), wedge-shaped, pointing anteriorly (1), or wedge-shaped, pointing posteriorly (2).  
*Maelestes* (?).

185. Incisive foramina (Luo and Wible, 2005: 409) – small, length of 1 or 2 incisors (0), intermediate, length of 3 or 4 incisors (1), or elongate, more than half the palate length (2).  
*Maelestes* (?).

186. Incisive foramina composition – between premaxilla and maxilla (0) or within premaxilla (1).  
*Maelestes* (?).

187. Palatal vacuities (Rougier et al., 1998: 93) – absent (0) or present (1).  
*Maelestes* (1).

188. Major palatine foramen – within palatine (0), between palatine and maxilla (1), within maxilla (2), multiple small foramina (3), or absent (4).  
*Maelestes* (1).

189. Anterior extent of palatine on palate (Wible et al., 2005: 55\*) – to level of first molar (0), more posterior (1), or more anterior (2).  
*Maelestes* (0).

190. Palatal expansion with regard to ultimate molar (Rougier et al., 1998: 94\*) – even with (0), posterior (1), or anterior (2).  
*Maelestes* (2).

191. Postpalatine torus (Rougier et al., 1998: 95) – absent (0) or present (1).  
*Maelestes* (1).

192. Posterior nasal spine – weak or absent (0) or prominent (1).  
*Maelestes* (0).

193. Minor palatine foramen (Rougier et al., 1998: 97\*) – small (0), large, with thin, posterior bony bridge (1), multiple small foramina (2), or absent (3).  
*Maelestes* (1).

194. Minor palatine foramen composition – palatine or maxilla-palatine (0) or palatine-pterygoid (1).

*Maelestes* (1).

195. Maxilla with large shelf-like expansion posterior to ultimate molar – absent (0) or present (1).

*Maelestes* (0).

#### Skull – Zygoma

196. Posterior edge of anterior zygomatic root (Meng et al., 2003: 123\*) – aligned with last molar (0), with anterior molars (1), or with premolars (2).

*Maelestes* (0).

197. Zygomatic process of maxilla – present (0) or vestigial (1).

*Maelestes* (1).

Most therians have a large zygomatic process of the maxilla that forms the ventral part of the anterior zygoma root, with the jugal forming the dorsal part. In a few forms considered here, including *Maelestes*, the zygomatic process of the maxilla is insignificant and the jugal forms the bulk of the anterior zygoma root or the anterior zygoma root is absent.

198. Jugal – present (0) or absent (1).

*Maelestes* (0).

199. Jugal (Wible et al., 2005: 58\*) – contributes to anteroventral orbit and zygoma (0) or contributes to zygoma (1). [Taxa without jugal are scored inapplicable.]

*Maelestes* (0).

200. Maxillary-jugal contact bifurcated (Rougier et al., 1998: 91) – absent (0) or present (1).

*Maelestes* (0). [Taxa without jugal are scored inapplicable.]

201. Jugal-lacrimal contact (Meng et al., 2003: 137) – present (0) or absent (1).

*Maelestes* (0). [Taxa without jugal and/or lacrimal are scored inapplicable.]

202. Zygomatic arch (Rougier et al., 1998: 92\*) – stout (0), delicate (1), or incomplete (2).

*Maelestes* (1).

#### Skull – Orbit

203. Roots of molars exposed in orbit floor (Asher et al., 2005: 126) – absent (0) or present (1).

*Maelestes* (1).

Because the derived state is present in some recent forms (e.g., *Solenodon*) and is not artifactual, we consider the occurrence of similar openings in fossils to be real.

204. Palatine reaches infraorbital canal (Rougier et al., 1998: 98) – present (0) or absent (1).  
*Maelestes* (1).
205. Lacrimal contributes to maxillary foramen (Luo and Wible, 2005: 376\*) – present (0) or absent (1). [Taxa without lacrimal are scored inapplicable.]  
*Maelestes* (0).
206. Groove connects maxillary and sphenopalatine foramina (Asher et al., 2005: 97\*) – absent (0) or present (1).  
*Maelestes* (1).
207. Sphenopalatine foramen (Asher et al., 2005: 133\*) – within palatine (0), between palatine and maxilla (1), between palatine, maxilla, and frontal (2), or within maxilla (3).  
*Maelestes* (1).
208. Sphenopalatine foramen proximal to maxillary foramen – absent (0) or present (1).  
*Maelestes* (0).
209. Maxilla excluded from medial orbital wall – present (0) or absent (1).  
*Maelestes* (0).
210. Frontal and maxilla contact in medial orbital wall (Geisler, 2001: 52) – absent (0) or present (1).  
*Maelestes* (0).
211. Orbital process of palatine (Asher et al., 2005: 127\*) – present (0) or absent or with thin sliver in ventromedial wall of orbit (1).  
*Maelestes* (0).
212. Ethmoid exposure in medial orbital wall – absent (0) or present (1).  
*Maelestes* (0).
213. Ethmoid foramen – between frontal and orbitosphenoid (0) or within frontal (1).  
*Maelestes* (0).
214. Foramen for frontal diploic vein – absent (0) or present (1).  
*Maelestes* (1).
215. Frontal foramen on skull roof (Thewissen et al., 2001: 41) – absent (0) or present (1).  
*Maelestes* (?).
216. Postorbital process (Meng et al., 2003: 145\*) – present, prominent (0), present, weak (1), or absent (2).  
*Maelestes* (0/1): the base of the postorbital process is preserved, but the size is unknown.
217. Postorbital process composition (Wible et al., 2005: 67\*) – frontal (0) or parietal (1).

*Maelestes* (0).

218. Postorbital bar (Meng et al., 2003: 145\*) – absent (0) or present (1).

*Maelestes* (0).

219. Dorsal process of jugal (Meng et al., 2003: 142\*) – weak or absent (0) or strong (1).

*Maelestes* (0).

220. Optic foramen (Rougier et al., 1998: 102) – absent (0) or present (1).

*Maelestes* (?).

221. Optic foramen position – narrowly (0) or broadly (1) separated from sphenorbital fissure, or not visible in lateral view (2). [Taxa without optic foramen are scored inapplicable.]

*Maelestes* (?).

222. Orbitosphenoid – expanded anteriorly from optic foramen (or with anterior process for forms without optic foramen) (0), expanded dorsally from optic foramen (or with dorsal process for forms without optic foramen) (1), or not expanded anteriorly or dorsally (2).

*Maelestes* (?).

223. Suboptic foramen – absent (0) or present (1).

*Maelestes* (?).

224. Orbitotemporal canal (Rougier et al., 1998: 103) – present (0) or absent (1).

*Maelestes* (0).

225. Frontal/alisphenoid contact (Luo and Wible, 2005: 382) – dorsal plate of the alisphenoid contacting frontal at anterior corner (0), with more extensive contact with frontal (~50% of its dorsal border) (1), or absent (2).

*Maelestes* (?).

#### Skull – Braincase

226. Frontal length on midline – subequal to slightly smaller than parietal (0), less than half that of parietal (1), or more than 50% longer than parietal (2).

*Maelestes* (1).

227. Frontoparietal suture – transverse (0), with anterior process of parietal off the midline (1), or with anterior process of parietal on the midline (2).

*Maelestes* (1).

228. Temporal lines meet on midline to form sagittal crest (Geisler, 2001: 33\*) – present (0) or absent (1).

*Maelestes* (?).

229. Interparietal (Rougier et al., 1998: 155) – absent (0) or present (1).  
*Maelestes* (?).

230. Nuchal crest – level with or anterior to foramen magnum (0) or posterior to foramen magnum (1).  
*Maelestes* (?).

231. Anterior lamina exposure on lateral braincase wall (Rougier et al., 1998: 108\*) – present (0) or absent (1).  
*Maelestes* (1).

232. Squama of squamosal (Rougier et al., 1998: 113) – absent (0) or present (1).  
*Maelestes* (1).

233. Foramina for temporal rami (Rougier et al., 1998: 143) – on petrosal (0), on parietal and/or squama of squamosal (1), or absent (2).  
*Maelestes* (1).

#### Skull – Mesocranium

234. Choanae – as wide as posterior palate (0) or narrower (1).  
*Maelestes* (1).

235. Vomer contacts pterygoid – absent (0) or present (1).  
*Maelestes* (?).

236. Pterygoids contact on midline (Rougier et al., 1998: 99) – present (0) or absent (1).  
*Maelestes* (0).

237. Pterygopalatine crests (Rougier et al., 1998: 100) – present (0) or absent (1).  
*Maelestes* (?).

238. Midline crest in basipharyngeal canal – absent (0) or present (1).  
*Maelestes* (1).

239. Entopterygoid process – absent (0), ends at anterior basisphenoid (1), or approaches ear region (2).  
*Maelestes* (2).

240. Midline rod-shaped eminence on basisphenoid – absent (0) or present (1).  
*Maelestes* (1).

241. Ectopterygoid process of alisphenoid (Rougier et al., 1998: 101\*) – absent (0), ends at anterior basisphenoid (1), or approaches ear region (2).  
*Maelestes* (2).



242. Ectopterygoid process of alisphenoid extent – long crest (0) or narrow process (1). [Taxa without ectopterygoid process are scored inapplicable.]

*Maelestes* (0).

243. Transverse canal foramen (Rougier et al., 1998: 104) – absent (0) or present (1).

*Maelestes* (?).

244. Exit for maxillary nerve relative to alisphenoid (Rougier et al., 1998: 110) – behind (0), within (2), or in front (2).

*Maelestes* (?).

245. Number of exit(s) for the mandibular branch of the trigeminal nerve (Luo and Wible, 2005: 317) – two (0) or one (1).

*Maelestes* (?).

246. Foramen ovale composition (Rougier et al., 1998: 111\*) – in petrosal (anterior lamina) (0), between petrosal and alisphenoid (1), in alisphenoid (2), or between alisphenoid and squamosal (3).

*Maelestes* (2/3): foramen ovale is not in the petrosal or between the petrosal and alisphenoid.

247. Foramen ovale position (Rougier et al., 1998: 112) – on lateral wall of braincase (0) or on ventral surface of skull (1).

*Maelestes* (?).

248. Alisphenoid canal (Rougier et al., 1998: 107) – absent (0) or present (1).

*Maelestes* (?).

249. Posterior opening of alisphenoid canal – separated from foramen ovale (0) or in common depression with foramen ovale (1). [Taxa without alisphenoid canal are scored inapplicable.]

*Maelestes* (?).

#### Skull – Basicranium

250. Position of jaw articulation relative to fenestra vestibuli (Rougier et al., 1998: 114) – at same level (0) or in front (1).

*Maelestes* (1).

251. Glenoid fossa position – on zygoma (0) or partially on braincase (1).

*Maelestes* (1).

252. Glenoid fossa shape (Rougier et al., 1998: 115\*; Archibald et al., 2001: 137\*) – concave, open anteriorly (0), trough-like (1), anteroposteriorly elongate (2), anteroposteriorly short (3), or convex, open anteriorly (4).

*Maelestes* (0).

253. Glenoid fossa position relative to sphenoid on midline skull base – even with (0) or higher (1).

*Maelestes* (0).

254. Glenoid process of jugal (Rougier et al., 1998: 116) – present, with articular facet (0), present, without facet (1), or absent (2). [Taxa without jugal are scored inapplicable.]

*Maelestes* (?).

255. Glenoid process of alisphenoid (Rougier et al., 1998: 117) – absent (0) or present (1).

*Maelestes* (0).

256. Postglenoid process (Rougier et al., 1998: 118) – absent (0) or present (1).

*Maelestes* (1).

257. Postglenoid foramen – absent (0) or present (1).

*Maelestes* (1).

258. Postglenoid foramen position (Rougier et al., 1998: 120\*) – behind postglenoid process (0), medial or anterior to postglenoid process (1), or on lateral aspect of braincase (2). [Taxa without postglenoid foramen are scored inapplicable.]

*Maelestes* (0).

259. Postglenoid foramen composition – within squamosal (0) or behind squamosal (1).

*Maelestes* (0). [Taxa without postglenoid foramen are scored inapplicable.]

260. Suprameatal foramen – absent (0) or present (1).

*Maelestes* (1).

261. Entoglenoid process of squamosal (Luo and Wible, 2005: 284) – absent (0), present, separate from postglenoid process (1), or present, continuous with postglenoid process (2).

*Maelestes* (0).

262. Posttympanic crest of squamosal (see Wible et al., 2004) – absent (0) or present (1).

*Maelestes* (0).

263. Carotid foramen (Rougier et al., 1998: 105\*) – within basisphenoid (0), between basisphenoid and petrosal (1), or absent (2).

*Maelestes* (0).

264. Cavum epiptericum (Rougier et al., 1998: 109\*) – floored by petrosal (0), petrosal and alisphenoid (1), primarily or exclusively squamosal (2), or primarily open as piriform fenestra (3).

*Maelestes* (3).

265. Alisphenoid tympanic process (Rougier et al., 1998: 121\*) – absent (0) or present (1).

*Maelestes* (0).

266. Basisphenoid tympanic process – absent (0) or present (1).

*Maelestes* (0).

267. Basicochlear fissure (Thewissen et al., 2001: 59\*) – closed (0) or patent (1).

*Maelestes* (0).

268. Epitympanic wing medial to promontorium (Rougier et al., 1998: 122\*) – absent (0), flat (1), or thickened (2).

*Maelestes* (1).

269. Rostral tympanic process of petrosal, on posteromedial aspect of promontorium (Rougier et al., 1998: 130\*) – absent or low ridge (0), moderate ridge, contributing to posterodorsomedial bulla (1), or tall ridge, contributing to ventral bulla (2).

*Maelestes* (0).

270. Course of internal carotid artery – lateral (transpromontorial) (0), medial (perbullar or extrabullar) (1), or absent (2).

*Maelestes* (0).

271. Intratympanic vascular canal (for transpromontorial internal carotid) – absent (0) or present (1).

*Maelestes* (0).

272. Deep groove for internal carotid artery excavated on anterior pole of promontorium (Rougier et al., 1998: 148) – absent (0) or present (1).

*Maelestes* (0).

273. Perbullar carotid canal (for medial internal carotid) – absent (0) or present (1).

*Maelestes* (-): inapplicable because the artery is transpromontorial and not medial.

274. Stapedial artery on promontorium (Asher et al., 2005: 161) – sulcus (0), canal (1), or absent (2).

*Maelestes* (0).

275. Stapedial ratio (Rougier et al., 1998: 127) – rounded, less than 1.8 (0) or elliptical, more than 1.8 (1).

*Maelestes* (1).

276. Coiling of cochlea (Rougier et al., 1998: 129) – less than 360° (0) or 360° or greater (1).

*Maelestes* (1).

277. Pars cochlearis length – more than 13% of skull length (0) or less than 10% of skull length (1).

*Maelestes* (1).

278. Promontorium shape – flat (0) or globose (1).

*Maelestes* (1).

279. Promontorium depth relative to basioccipital – even with or ventral to (0) or dorsal to (1).

*Maelestes* (0).

280. Intratympanic course of facial nerve (Meng et al., 2003: 169\*) – open in sulcus (0), open anteriorly, canal posteriorly (1), or in canal (2).

*Maelestes* (0).

281. Tympanic aperture of hiatus Fallopii (Rougier et al., 1998: 123\*) – in roof through petrosal (0), at anterior edge of petrosal (1), absent (2), or via fenestra semilunaris (3).

*Maelestes* (2).

282. Prootic canal (Rougier et al., 1998: 124\*) – present (0) or absent (1).

*Maelestes* (0).

283. Prootic canal length and orientation (Rougier et al., 1998: 124\*) – long and vertical (0), short and vertical (1), or short and horizontal (2). [Taxa without prootic canal are scored inapplicable.]

*Maelestes* (2).

284. Lateral flange (Rougier et al., 1998: 126\*) – parallels length of promontorium (0) or greatly reduced or absent (1).

*Maelestes* (1).

285. Length of bony shelf lateral to promontorium (lateral trough or tegmen tympani) – extended anteriorly as far as promontorium (0), confined posterolaterally (1), or prolonged anterior to promontorium (2).

*Maelestes* (1).

286. Width of bony shelf lateral to promontorium (lateral trough or tegmen tympani) – uniform (0) or expanded anteriorly (1).

*Maelestes* (0).

287. Inflation of bony shelf lateral to promontorium (lateral trough or tegmen tympani) (Thewissen et al., 2001: 52\*) – absent (0) or present (1).

*Maelestes* (0).

288. Stapedial canal on bony shelf lateral to promontorium (lateral trough or tegmen tympani) – absent (0) or present (1).

*Maelestes* (0).

289. Tensor tympani fossa (Geisler, 2001: 14\*) – shallow (0) or deep circular pit (1).

*Maelestes* (0).

290. Medial process of squamosal in tympanic cavity (Rougier et al., 1998: 141) – absent (0) or present (1).

*Maelestes* (0).

291. Hypotympanic sinus (Rougier et al., 1998: 140\*) – absent (0), formed by squamosal, petrosal, and alisphenoid (1), formed by alisphenoid and petrosal (2), or formed by petrosal (3).

*Maelestes* (0).

292. Epitympanic recess/fossa incudis size – subequal (0), epitympanic recess larger (1), or no visible depression for epitympanic recess (2).

*Maelestes* (0).

293. Epitympanic recess lateral wall (Rougier et al., 1998: 138\*) – with small contribution to posterolateral wall by squamosal (0), with extensive contribution to lateral wall by squamosal (1), or with no squamosal contribution (2).

*Maelestes* (1).

294. Fossa incudis (Rougier et al., 1998: 137) – continuous with (0) or separated from epitympanic recess (1).

*Maelestes* (0).

295. Floor ventral to fossa incudis – absent (0), formed by squamosal (1), or formed by ectotympanic (2).

*Maelestes* (0).

296. Fossa incudis position relative to fenestra vestibuli – lateral (0) or anterior (1).

*Maelestes* (1).

297. Foramen for ramus superior of stapedial artery (Rougier et al., 1998: 145) – on petrosal (0), on petrosal-squamosal suture (1), or absent (2).

*Maelestes* (1/2): unclear if foramen is absent or in piriform fenestra.

298. Position of ramus superior foramen relative to fenestra vestibuli (Luo and Wible, 2005: 326) – posterior or lateral (0) or anterior (1). [Taxa without ramus superior are scored inapplicable.]

*Maelestes* (?).

299. Ascending canal (Rougier et al., 1998: 152) – intramural (0), intracranial (1), or absent (2).

*Maelestes* (1/2): canal is either absent or intracranial.

300. Stapedius fossa (Rougier et al., 1998: 139) – twice the size of fenestra vestibuli (0) or small and shallow (1).

*Maelestes* (0).

301. Cochlear canaliculus visible canal in middle ear space – absent (0) or present (1).

*Maelestes* (0).

302. Cochlear fossula – weak or absent (0) or distinct pit behind fenestra cochleae (1).  
*Maelestes* (1).
303. Fenestra cochleae position to fenestra vestibuli – posteromedial (0) or posterior (1).  
*Maelestes* (0).
304. Posterior septum shields fenestra cochleae – absent (0) or present (1).  
*Maelestes* (0).
305. Paroccipital process (sensu Wible and Hopson, 1993) (Rougier et al., 1998: 131) – vertical (0), slanted, projecting anteroventrally as flange towards back of promontorium (1), or indistinct to absent (2).  
*Maelestes* (0).
306. Caudal tympanic process of petrosal notched (Rougier et al., 1998: 132\*) – absent (0) or present (1).  
*Maelestes* (1).
307. Crista interfenestralis and caudal tympanic process of the petrosal connected by curved ridge (Rougier et al., 1998: 133) – absent (0) or present (1).  
*Maelestes* (1).
308. “Tympanic process” (Rougier et al., 1998: 134) – absent (0), present, low (1), or present, high.  
*Maelestes* (1).
309. “Tympanic process” composition – petrosal (0) or petrosal and exoccipital (1). [Taxa without “tympanic process” are scored inapplicable.]  
*Maelestes* (1).
310. Rear margin of auditory region (Rougier et al., 1998: 136) – marked by steep wall (0) or extended onto a flat surface (1).  
*Maelestes* (1).
311. Inferior petrosal sinus (Rougier et al., 1998: 151) – intrapetrosal (0), between petrosal, basisphenoid, and basioccipital (1), or endocranial (2).  
*Maelestes* (1/2): intrapetrosal course can be excluded because no appropriate foramina are present.
312. Jugular foramen size relative to fenestra cochleae (Rougier et al., 1998: 149) – subequal (0) or larger (1).  
*Maelestes* (0).
313. Jugular foramen (Rougier et al., 1998: 150) – confluent with (0) or separated from opening for inferior petrosal sinus (1).

*Maelestes* (0).

314. Hypoglossal foramen (Luo and Wible, 2005: 349) – two or more (0) or one (1).

*Maelestes* (0+1): right side has three and the left side one.

315. Hypoglossal foramen housed in opening larger than jugular foramen – absent (0) or present (1).

*Maelestes* (1).

316. Paracondylar (“paroccipital”) process of exoccipital (sensu Evans and Christensen, 1979) (Rougier et al., 1998: 135\*) – weak or absent (0), prominent, vertical (1), or prominent, posteriorly directed (2).

*Maelestes* (0).

317. Ectotympanic – phaneric or visible in ventral view (0) or aphaneric or hidden by auditory bulla (1).

*Maelestes* (0).

318. Ectotympanic shape (Rougier et al., 1998: 142) – ring-like (0), fusiform (1), or expanded (2).

*Maelestes* (?): the ectotympanic is insufficiently preserved to evaluate.

319. Anterior crus of ectotympanic broadly contacts facet on squamosal – absent (0) or present (1).

*Maelestes* (0).

320. Elongate ossified external acoustic canal – absent (0) or present (1).

*Maelestes* (?).

321. Roof of external acoustic meatus – petrosal (0) or squamosal (1).

*Maelestes* (0).

322. Entotympanic (Luo and Wible, 2005: 363) – absent (0) or present (1).

*Maelestes* (0).

323. Pit on ectotympanic for hyoid – absent (0) or present (1).

*Maelestes* (?): the ectotympanic is insufficiently preserved to evaluate.

324. Hyoid arch contributes to bulla – absent (0) or present (1).

*Maelestes* (?).

325. Dorsum sellae (Rougier et al., 1998: 106) – tall (0) or low (1).

*Maelestes* (1).

326. Posterior clinoid process contacts anterior pole of promontorium (see Wible et al., 2004) – absent (0) or present (1).

*Maelestes* (0).

327. Position of sulcus for anterior distributary of transverse sinus relative to subarcuate fossa (Rougier et al., 1998: 125) – anterolateral (0) or posterolateral (1).

*Maelestes* (0).

328. Wall separating cavum supracochleare from cavum epiptericum (Rougier et al., 1998: 128\*) – absent (0), incomplete, with fenestra semilunaris (1), or complete (2).

*Maelestes* (2).

329. Crista petrosa – vestigial or absent (0) or tall, thin crest (1).

*Maelestes* (1).

330. Subarcuate fossa aperture – not constricted (0), constricted (1), or fossa absent (2).

*Maelestes* (1).

331. Anterior semicircular canal – does (0) or does not form lateral wall of subarcuate fossa aperture (1).

*Maelestes* (1).

332. Internal acoustic meatus (Rougier et al., 1998: 153) – deep, with thick prefacial commissure (0) or shallow, with thin prefacial commissure (1).

*Maelestes* (1).

#### Skull – Occiput

333. Posttemporal canal (Rougier et al., 1998: 144) – large (0), small (1), or absent (2).

*Maelestes* (1).

334. Posttemporal canal composition – between petrosal and squamosal (0) or within petrosal (1).

*Maelestes* (1).

335. Posttemporal canal position – on occiput (0) or dorsal to external acoustic meatus (1).

*Maelestes* (0).

336. Mastoid foramen (Meng et al., 2003: 114\*) – absent (0), two in mastoid (1), one in mastoid (2), or between mastoid and supraoccipital (3).

*Maelestes* (0/3): foramen is either absent or between mastoid and supraoccipital.

337. Amastoidy or lack of occipital exposure of mastoid (Geisler, 2001: 38) – absent (0) or present (1).

*Maelestes* (0).



338. Dorsal margin of foramen magnum (Rougier et al., 1998: 156) – formed by exoccipitals (0) or by exoccipitals and supraoccipital (1).  
*Maelestes* (?).

#### Postcranium – Vertebrae

339. Atlantal foramen (Horovitz and Sánchez-Villagra, 2003: 1\*) – present (0) or absent (1).  
*Maelestes* (1).

340. Atlas neural hemiarches fused – absent (0) or present (1).  
*Maelestes* (0).

341. Atlas neural arch and intercentrum fused (Luo and Wible, 2005: 167) – absent (0) or present (1).  
*Maelestes* (0).

342. Axis (Luo and Wible, 2005: 169\*) – with (0) or without suture between atlantal and axial parts (1).  
*Maelestes* (0).

343. Axis with extra pair of transverse processes on ventral surface of body (Horovitz and Sánchez-Villagra, 2003: 11\*) – present (0) or absent (1).  
*Maelestes* (1).

344. Axis anterior facets (prezygopophyses) and dens connection (Horovitz and Sánchez-Villagra, 2003: 12\*) – not linked (0), linked (1), or facets extend ventral to dens (2).  
*Maelestes* (0).

345. Inferior lamellae on posterior cervical vertebrae – present (0) or absent (1).  
*Maelestes* (?).

346. C7 transverse foramen (Horovitz and Sánchez-Villagra, 2003: 21\*) – present (0) or absent (1).  
*Maelestes* (?).

347. Number of thoracic vertebrae (Luo and Wible, 2005: 172) – 13 or fewer (0) or 15 or more (1).  
*Maelestes* (?).

After submission of our paper, Sánchez-Villagra et al. (2007) reviewed the number of thoracolumbar vertebrae across a broad spectrum of mammals and reported that an increase from the plesiomorphic condition of 19 represents a synapomorphy of Afrotheria. In our analysis, we did not consider thoracolumbar vertebrae as a single unit, but retained separate characters for the number of thoracic versus lumbar vertebrae.

348. Number of lumbar vertebrae – 6 or more (0) or 5 or fewer (1).

*Maelestes* (?).

349. Xenarthrous articulations on lumbar vertebrae (Luo and Wible, 2005: 176) – absent (0) or present (1).

*Maelestes* (?).

350. Number of sacral vertebrae (Geisler, 2001: 131\*) – 2 (0), 3 (1), or 4 or more (2).

351. Sacral vertebrae fused to pelvis – absent (0) or present (1).

*Maelestes* (?).

#### Postcranium – Pectoral Girdle and Forelimb

352. Infraspinous fossa position to supraspinous fossa (Rougier, 1993: 13\*) – different planes (in part, medial to) (0) or coplanar (1).

*Maelestes* (0).

353. Suprascapular incisure (Luo and Wible, 2005: 196) – absent (0) or present (1).

*Maelestes* (0).

354. Acromion (Asher et al., 2005: 174\*) – reaches distal to glenoid articulation (0), is proximal (1), or absent (2).

*Maelestes* (0).

355. Metacromion – weak or absent (0) or well-developed process (1).

*Maelestes* (?).

356. Greater tubercle of humerus (Asher et al., 1998: 175) – ventral to (0) or even with or dorsal to humeral head (1).

*Maelestes* (1).

357. Extension of deltopectoral crest (Horovitz and Sánchez-Villagra, 2003: 50) – limited to proximal half of humerus (0) or reaches distal half (1).

*Maelestes* (0).

358. Sigmoidal shelf for supinator ridge extending proximally from ectepicondyle (Luo and Wible, 2005: 206) – weak or absent (0) or present (1).

*Maelestes* (0).

359. Medial epicondyle (Geisler, 2001: 134) – robust (0) or weak (1).

*Maelestes* (0).

360. Entepicondylar foramen (Geisler, 2001: 135) – present (0) or absent (1).

*Maelestes* (0).

361. Supratrochlear foramen (Asher et al., 1998: 178) – absent (0) or present (1).

*Maelestes* (1).

362. Ulnar articulation on humerus (Luo and Wible, 2005: 203\*) – cylindrical trochlea in posterior view with a vestigial ulnar condyle in anterior view (0) or cylindrical trochlea without an ulnar condyle (cylindrical trochlea extending to the anterior/ventral side) (1).

*Maelestes* (1).

363. Radial articulation on humerus (Luo and Wible, 2005: 204\*) – rounded radial condyle anteriorly but cylindrical posteriorly (0) or capitulum (forming a continuous synovial surface with the ulnar trochlea; cylindrical in both anterior and posterior aspects) (1).

*Maelestes* (1).

364. Humeral articulation on radius (Geisler, 2001: 141\*) – single fossa (0) or two fossae (1).

*Maelestes* (0).

365. Central process of radial head (Asher et al., 2005: 181) – small or absent (0) or present (1).

*Maelestes* (0).

366. Radius and ulna distal fusion (Thewissen et al., 2001: 81) – absent (0) or present (1).

*Maelestes* (?).

367. Radial articulation with carpals (Thewissen et al., 2001: 80) – single fossa (0) or two fossae (1).

*Maelestes* (?).

368. Scaphoid and lunate (Asher et al., 2005: 183) – separate (0) or fused (1).

*Maelestes* (?).

369. Os centrale (Asher et al., 2005: 184) – present (0) or absent (1).

*Maelestes* (?).

#### Postcranium – Pelvic Girdle and Hindlimb

370. Pubic symphysis (Meng et al., 2003: 22\*) – extensive (0) or narrow (1).

*Maelestes* (?).

371. Epipubic bone (Luo and Wible, 2005: 218) – present (0) or absent (1).

*Maelestes* (?).

372. Articular surface of femoral head (Asher et al., 2005: 186) – extended posterolaterally (0) or limited to sphere of head (1).

*Maelestes* (?).

373. Fovea for ligamentum teres (MacPhee, 1994: 27) – does not (0), or does (1) interrupt margin of articular surface of femoral head, or absent (2).

*Maelestes* (?).

374. Greater trochanter to femoral head (Horovitz and Sánchez-Villagra, 2003: 79) – lower (0) or higher (1).

*Maelestes* (?).

375. Size of lesser trochanter of femur (Luo and Wible, 2005: 228) – large (0) or small (1).

*Maelestes* (?).

376. Third trochanter of femur (Asher et al., 2005: 188) – absent (0) or present (1).

*Maelestes* (?).

377. Pectineal tubercle (see Lessertisseur and Saban, 1967b) – absent or vestigial (0) or distinct (1).

*Maelestes* (?).

378. Distal femur (Asher et al., 2005: 189) – similar in size in anteroposterior and mediolateral dimensions (0) or longer anteroposteriorly (1).

*Maelestes* (?).

379. Patellar facet ('groove') of femur (Luo and Wible, 2005: 230\*) – weakly developed (0), broad and shallow (1), or narrow and elevated (2).

*Maelestes* (?).

380. Ossified patella (Luo and Wible, 2005: 273) – absent (0) or present (1).

*Maelestes* (?).

381. Articulation between femur and fibula (Horovitz and Sánchez-Villagra, 2003: 84) – absent (0) or present (1).

*Maelestes* (?).

382. Tibia and fibula proximal fusion (Asher et al., 2005: 190) – absent (0) or present (1).

*Maelestes* (?).

383. Tibia and fibula distal fusion (Horovitz and Sánchez-Villagra, 2003: 87) – absent (0) or present (1).

*Maelestes* (?).

384. Depth of trochlear groove (Zack et al., 2005: 40\*) – shallow (0) or moderately deep (U-shaped) (1).

*Maelestes* (0).

385. Astragalus, angle between medial and lateral facets for tibia (Horovitz and Sánchez-Villagra, 2003: 94\*) – 180° (0), intermediate (1), or 90° (2).

*Maelestes* (1).

386. Astragalus, angle between facet for fibula and lateral facet for tibia (Horovitz and Sánchez-Villagra, 2003: 99) – 180° (0), intermediate (1), or 90° (2).

*Maelestes* (1).

387. Radius of curvature of lateral trochlear ridge (Zack et al., 2005: 41) – greater than (0) or subequal to medial trochlear ridge (1).

*Maelestes* (0).

388. Cotylar fossa (Zack et al., 2005: 44\*) – absent (0) or present (1).

*Maelestes* (0).

389. Sustentacular and navicular facets of astragalus contact (Asher et al., 2005: 204) – absent (0) or present (1).

*Maelestes* (?).

390. Astragalar sustentacular facet medial extent (Horovitz and Sánchez-Villagra, 2003: 102) – does not (0) or does reach medial edge of neck (1).

*Maelestes* (?).

391. Astragalar medial planar tuberosity (ampt) (Horovitz and Sánchez-Villagra, 2003: 98\*) – weak or absent (0) or protruding (1).

*Maelestes* (?).

392. Astragalar neck (Horovitz and Sánchez-Villagra, 2003: 100) – absent (0), present, shorter than body width (1), or present, similar in length to body width (2).

*Maelestes* (1).

393. Convex astragalar head (Thewissen et al., 2001: 92\*) – absent (0) or present (1).

*Maelestes* (1).

394. Facet on astragalus for cuboid (Asher et al., 2005: 208) – absent (0) or present (1).

*Maelestes* (?).

395. Astragalar canal (Horovitz and Sánchez-Villagra, 2003: 104\*) – present (0), dorsal foramen only (1), or absent (2).

*Maelestes* (?).

396. Posterior trochlear shelf of astragalus (Asher et al., 2005: 198) – weak or absent (0) or strong (1).

*Maelestes* (0).

397. Calcaneal width (Asher et al., 2005: 210) – broad with sustentacular and ectal facets extending from body (0) or narrow with sustentacular and ectal facets in line with long axis (1).

*Maelestes* (?).

398. Ectal (or posterior calcaneoastagalus facet) longest dimension (Horovitz and Sánchez-Villagra, 2003: 113) – anteromedial to posterolateral (0), straight (1), or posteromedial to anterolateral (2).

*Maelestes* (?).

399. Anteroposterior overlap between calcaneal ectal and sustentacular facets (Zack et al., 2005: 32\*) – no overlap (0), partial overlap (1), or nearly complete overlap (2).

*Maelestes* (?).

400. Calcaneal sustentacular facet mesiolateral orientation (Horovitz and Sánchez-Villagra, 2003: 118) – medial (0) or dorsal (1).

*Maelestes* (?).

401. Calcaneal sustentacular facet expanded onto body – absent (0) or present (1).

*Maelestes* (?).

402. Calcaneal anterior peroneal tubercle position (Horovitz and Sánchez-Villagra, 2003: 117) – protruding anteriorly beyond calcaneocuboid facet (0), anterior, non-protruding (1), or at a distance from anterior end of calcaneum (2).

*Maelestes* (?).

403. Calcaneal plantar tubercle (Horovitz and Sánchez-Villagra, 2003: 122\*) – absent (0), present, at distal margin (1), or present, more proximal (2).

*Maelestes* (?).

404. Tuber calcis ventral curvature (Horovitz, 2000: 3\*) – present (0) or absent (1).

*Maelestes* (?).

405. Calcaneal facet for fibula (Horovitz and Sánchez-Villagra, 2003: 125\*) – present (0) or absent (1).

*Maelestes* (?).

406. Orientation of ML axis of cuboid facet on calcaneum relative to long axis of calcaneum (Zack et al., 2005: 37) –  $\sim 90^\circ$  (0),  $\sim 70\text{-}80^\circ$  (1), or less than  $\sim 70^\circ$  (2).

*Maelestes* (?).

407. Proportions of cuboid facet on calcaneum (Zack et al., 2005: 38) – facet much deeper (dorsoventral) than wide (mediolateral) (0), facet depth and width subequal (1), or facet much wider (mediolateral) than deep (dorsoventral) (2).

*Maelestes* (?).

408. Deep groove for tendon of flexor fibularis on calcaneum – absent (0) or present (1).

*Maelestes* (?).

#### Part IV. List of Taxa and Sources

- Nanolestes drescherae*, *N. krusati* – Martin (2002)
- Peramus tenuirostris* – Simpson (1928); Mills (1964); Clemens and Mills (1971); Rougier et al. (1998); Sigogneau-Russell (1999); Butler and Clemens (2001)
- Vincelestes neuquenianus* – Rougier et al. (1992, 1998); Rougier (1993); Horovitz (2000); Horovitz and Sánchez-Villagra (2003)
- Kielantherium gobiensis* – Crompton and Kielan-Jaworowska (1978); Kielan-Jaworowska and Dashzeveg (1984); Lopatin and Averianov (2006)
- Deltatheridium pretrituberculare* – Kielan-Jaworowska (1975c); Rougier et al. (1998, 2004); Horovitz (2000); Horovitz and Sánchez-Villagra (2003)
- Mayulestes ferox* – Muizon (1998); Rougier et al. (1998); Horovitz (2000); Argot (2002); Horovitz and Sánchez-Villagra (2003)
- Pucadelphys andinus* – Marshall et al. (1995); Rougier et al. (1998); Horovitz (2000); Argot (2002); Horovitz and Sánchez-Villagra (2003)
- Eomaia scansoria* – Ji et al. (2002)
- Prokennalestes trofimovi*, *P. minor* – Kielan-Jaworowska and Dashzeveg (1989); Sigogneau-Russell et al. (1992); Rougier et al. (1998); Wible et al. (2001)
- Murtoilestes abramovi* – Averianov and Skutschas (2000, 2001)
- Bobolestes zenge* – Nessov et al. (1994); Averianov and Archibald (2005)
- Montanalestes keebleri* – Cifelli (1999); OMNH 60793
- Sheikhdzheilia rezvyii* – Averianov and Archibald (2005)
- Alostera saskatchewanensis* – Fox (1989); Storer (1991)
- Lainodon orueetxebarriai* – Gheerbrant and Astibia (1994, 1999)
- Avitotherium utahensis* – Cifelli (1990, pers. comm.)
- Gallolestes pachymandibularis*, *G. agujaensis* – Lillegraven (1972, 1976); Clemens (1980); Butler (1990); Cifelli (1994)
- Parazhelestes robustus*, *P. mynbulakensis* – Nessov et al. (1998); Archibald et al. (2001); Ekdale et al. (2004); Archibald and Averianov (2005); Archibald (pers. comm.)
- Aspanlestes aptap* – Nessov et al. (1994, 1998); Archibald et al. (2001); Averianov and Archibald (2003); Ekdale et al. (2004); Archibald (pers. comm.)
- Zhelestes temirkaysk* – Nessov et al. (1994, 1998); Archibald et al. (2001); Ekdale et al. (2004); Archibald and Averianov (2005); Archibald (pers. comm.)
- Paranyctoides sternbergi*, *P. maleficus*, *P. megakeros*, *P. aralensis*, *P. spp.* – Fox (1979, 1984); Lillegraven and McKenna (1986); Cifelli (1990); Archibald and Averianov (2001); Archibald et al. (2001)
- Eozhelestes mangit* – Averianov and Archibald (2005)
- Cimolestes incisus*, *C. simpsoni*, *C. propalaeoryctes*, *C. stirtoni*, *C. magnus* – Reynolds (1936); Clemens and Russell (1965); Van Valen (1966); Lillegraven (1969); Clemens (1973)
- Maelestes gobiensis* – this report
- Batodon tenuis* – Lillegraven (1969); Clemens (1973); Storer (1991); Wood and Clemens (2001)
- Bulaklestes kezbe* – Archibald and Averianov (2006)
- Daulestes kulbeckensis*, *D. inobservabilis* – Nessov et al. (1994); Archibald and Averianov (2006)



- Uchkudukodon nessovi* – McKenna et al. (2000); Archibald and Averianov (2006); Archibald (pers. comm.)
- Kennalestes gobiensis* – Kielan-Jaworowska (1969, 1977, 1981); Crompton and Kielan-Jaworowska (1978); Rougier et al. (1998)
- Asioryctes nemegtensis* – Kielan-Jaworowska (1975b, 1977, 1981); Rougier et al. (1998); Horovitz (2000); Horovitz and Sánchez-Villagra (2003)
- Ukhaatherium nessovi* – Novacek et al. (1997); Horovitz (2000, 2003); Rougier et al. (1998); Horovitz and Sánchez-Villagra (2003)
- Deccanolestes hislop*, *D. robustus* – Prasad and Sahni (1988); Godinot and Prasad (1994); Prasad and Godinot (1994); Prasad et al. (1994); Rana and Wilson (2003)
- Kulbeckia kulbecke* – Archibald and Averianov (2003); Ekdale et al. (2004)
- Zhangolestes jiliensis* – Zan et al. (2006)
- Alymlestes kielanae* – Averianov and Nessov (1995)
- Zalambdalestes lechei* – Kielan-Jaworowska (1978, 1984a); Kielan-Jaworowska and Trofimov (1981); Novacek et al. (1997); Fostowicz-Frelik and Kielan-Jaworowska (2002); Wible et al. (2004); Archibald and Averianov (2006)
- Barunlestes butleri* – Kielan-Jaworowska (1975a, 1975b, 1978); Kielan-Jaworowska and Trofimov (1980); Fostowicz-Frelik and Kielan-Jaworowska (2002); Wible et al. (2004); Archibald and Averianov (2006)
- Gypsonictops hypoconus*, *G. illuminatus*, *G. lewisi* – Lillegraven (1969); Sahni (1972); Clemens (1973); Crompton and Kielan-Jaworowska (1978); Fox (1979)
- Leptictis* spp. – Lillegraven (1969); Novacek (1986a); Cavigelli (1997); Rougier et al. (1998); Rose (1999, in press); Asher et al. (2005)
- Purgatorius unio*, *P. janisae* – Van Valen and Sloan (1965); Clemens (1974, 2004); Van Valen (1994)
- Protungulatum donnae*, *P. mckeeveri*, *P. gorgon* – Sloan and Van Valen (1965); MacIntyre (1972); Szalay and Decker (1974); Kielan-Jaworowska et al. (1979); Archibald (1982, 1998); Luo (1991); Lofgren (1995)
- Oxyprimus erikseni* – Archibald (1982); Luo (1991); Lofgren (1995)
- Vulpavus profectus*, *V. ovatus*, *V. canavus* – Matthew (1909, 1915); Cifelli (1982); Gingerich (1983); Wang and Tedford (1994); Heinrich and Rose (1997); Geisler (2001); AMNH 11498 cast of skull
- Miacis parvivorus*, *M. sylvestris* – Matthew (1909); AMNH 129284
- Gujaratia pakistanensis* – Thewissen et al. (1983, 2001); Russell et al. (1983); Geisler and Luo (1998); Thewissen and Hussain (1990); Geisler (2001); Bajpai et al. (2005)
- Hyopsodus* spp. – Gazin (1968); West (1979); Cifelli (1982); Geisler (2001); Thewissen et al. (2001); Asher et al. (2005); Zack et al. (2005)
- Phenacodus* spp. – Osborn (1898); Kitts (1956); Radinsky (1966); Cifelli (1982); Thewissen (1990); Geisler (2001); Thewissen et al. (2001)
- Meniscotherium* spp. – Gazin (1965); Cifelli (1982); Williamson and Lucas (1992); MacPhee (1994); Geisler (2001); Thewissen et al. (2001)
- Ptilocercus lowii* – Le Gros Clark (1926); Szalay and Drawhorn (1980); Butler (1980); Sargis (2001, 2002a, b, c); USNM 483068, 488052, 488058
- Plesiadapis tricuspidens*, *P. gidleyi* – Simpson (1935); Russell (1964); Szalay and Decker (1974); Szalay et al. (1975); Gingerich (1976)

- Notharctus osborni*, *N. venticolus*, *N. tenebrosus*, *N. robustior*, *N. crassus* – Gregory (1920); Gazin (1958); Decker and Szalay (1974)
- Adapis parisiensis*, *A. magnus* – Stehlin (1912); Gregory (1920); Decker and Szalay (1974); Gingerich (1981); Gingerich and Martin (1981); MacPhee and Cartmill (1986)
- Tribosphenomys minutus*, *T. secundus* – Meng and Wyss (2001); Lopatin and Averianov (2004)
- Paramys delicatus*, *P. copei*, *P. taurus* – Matthew (1910); Wood (1962); Wahlert (1974, 2000); Rose and Chinnery (2004)
- Rhombomylus turpanensis* – Meng et al. (2003)
- Gomphos elkema* – Meng et al. (2004); Asher et al. (2005)
- Mimotona wana* – Li and Ting (1993); Asher et al. (2005)
- Blarina brevicauda* – CM 261, 24287, 50523, 102792; Gaughran (1954)
- Erinaceus europaeus* – CM 1692, 89002, 92138, 107856, 107857; Gould (1995, 2001)
- Solenodon paradoxus* – AMNH 185012, 212912
- Eoryctes melanus* – Thewissen and Gingerich (1989)
- Potamogale velox* – CM 3931, 6129, 9501, 16034, 40781, 42297, 42298; AMNH 34881, 51344
- Orycteropus afer* – CM 1758, 20920, 57994; Le Gros Clark and Sonntag (1926); Colbert (1941); Lessertisseur and Saban (1967a, 1967b); MacPhee (1994)
- Rhynchocyon cirnei* – CM 86641, 86642, 86643, 86644, 86645 *R. petersi* CM 18067; Evans (1942)
- Procavia capensis* – CM 47320, 48676, 48677, 51880, 51881, 51882; Lessertisseur and Saban (1967a, 1967b); Cifelli (1982)
- Moeritherium trigodon* – Andrews (1906); Tassy (1981); Court (1994)
- Chaetophractus villosus* – CM 2369
- Bradypus variegatus*, *Bradypus* sp. – CM 1365, 2180, 21006, 22556; Wible and Gaudin (2004)
- Tamandua tetradactyla*, *T. mexicana* – CM 683, 649, 91944; Patterson et al. (1992); Wible and Gaudin (2004)

### Part V. Taxon-Character Matrix

The taxon-character matrix is presented in two forms. The first is in reader friendly format, facilitating comparisons; the second is in a format facilitating importation to a parsimony computer program, such as TNT (Goloboff et al., 2003) or PAUP (Swofford, 2002).

Each of the 69 taxa in Part II are scored for the 408 characters in Part I. Numbers (0-5) refer to states of those characters. “?” and “-“ are unknown and non-applicable respectively. Letters are explained below: “/” is either/or and “+” is and, both of which are treated as either/or in the phylogenetic analysis; true polymorphisms are noted here for the sake of completeness.

A = 0/1  
 B = 0+1  
 C = 0/2  
 D = 0+2  
 E = 0/3  
 F = 0+3  
 G = 0/1/2  
 H = 0+1+2  
 J = 0/1/3  
 K = 1/2  
 L = 1+2  
 M = 1/3  
 N = 1+3  
 P = 1/2/3  
 R = 1+2+3  
 S = 2/3  
 T = 2+3

#### *Nanolestes*

```
000?0 ??0?? ?????0 ?1?0? 00000 0??00 000?0 00000 01000 ?0000
00000 00010 0?000 0?010 20110 A0000 0000- -000- -0--- -----
0?0?? 00000 00010 00010 ?0--- 0?002 0?000 1???? 00200 00?1?
02000 ?00?? ?????? ?????? ?????? ?????? ?????? ?????? ??????
?????? ?????? ?????? ?????? ?????? ?????? ?????? ?????? ??????
?????? ?????? ?????? ?????? ?????? ?????? ?????? ?????? ??????
?????? ?????? ?????? ?????? ?????? ?????? ?????? ?????? ??????
?????? ????
```

#### *Peramus*

```
000E0 ??G?? ?????? ?????0? 00010 1??0? 10000 00000 01000 00000
00001 10001 10000 00002 00000 10100 0000- -000- -0--- -----
0?00? 00000 00010 00001 00--- 0002L 01011 110?1 00200 010?1
01000 01???? ?????? 0????? ?????? ?????? ?????? ?????? ??????
?????? ?????? ?????? ?????? ?????? ?????? ?????? ?????? ??????
?????? ?????? ?????? ?????? ?????? ?????? ?????? ?????? ??????
?????? ?????? ?????? ?????? ?????? ?????? ?????? ?????? ??????
?????? ????
```

*Vincelestes*

00300 01100 00000 00000 00000 10?30 0---- 00000 00000 1----  
 -0000 0--00 10100 00102 00100 22101 10010 0000- 01000 000--  
 02110 01000 00030 01001 00--- 01032 11001 12011 00001 01101  
 0201- 01100 0000B 00000 000-0 00010 00000 00000 00000 00000  
 00000 00000 00000 00000 -0000 00000 00000 001-0 0-000 000-0  
 00000 00--0 00000 00000 00-00 00000 00000 00000 00000 00000  
 00000 000-0 00000 0??0? 00000 00100 00000 00000 0?020 0?000  
 0000? 00000 00000 00000 00000 00?00 ?0000 0-000 00000 00000  
 01000 000

*Kielantherium*

000?? ?????? ?????? ???0? ?????? ???1? ?????? ?????? ?????? ?000-  
 -????? ?????? 00011 10112 00022 A1100 00011 1100- 02000 000--  
 0?1?? 02000 00011 00101 00--- 01A?1 01??? ?001? ?????? ??????  
 ?????01 0????? ?????? ?????? ?????? ?????? ?????? ?????? ??????  
 ?????? ?????? ?????? ?????? ?????? ?????? ?????? ?????? ??????  
 ?????? ?????? ?????? ?????? ?????? ?????? ?????? ?????? ??????  
 ?????? ?????? ?????? ?????? ?????? ?????? ?????? ?????? ??????  
 ?????? ?????? ?????? ?????? ?????? ?????? ?????? ?????? ??????  
 ?????? ?????? ?????? ?????? ?????? ?????? ?????? ?????? ??????  
 ?????? ???

*Deltatheridium*

00100 01100 00000 00?0? 01010 10121 0010- 00000 00000 0101-  
 -0000 00000 01011 10100 00022 11100 10101 11220 12000 000--  
 01110 02100 00011 00101 110-0 01013 01001 11000 01100 01011  
 0001- 11111 00001 000?0 010-0 01000 00100 ?0000 001?0 10000  
 00000 0??10 ?????? ???01 ?????? ?????? 1121? ?????? ?????? ??????  
 ?1?A0 1100? ???1? ???10C -0-20 111?0 20211 0000? 0??00 02-20  
 00001 000-0 101?? ?????? 1?0?? 012?? ?01?0 ?0??0 ?????? ??????  
 ?????? ?????? ?????? ?????? ?????? ?????? ?????? ?????? ??????  
 0??00 ??0

*Mayulestes*

00100 00000 00000 00000 01010 10?2? 0100- 00000 00000 0100-  
 -?000 00000 01011 10100 20122 12210 10111 11220 12110 000--  
 00110 00110 10111 30113 11000 10013 01?0? ?00?? ?????? ??????  
 00011 ??111 10111 00001 010-0 01000 00101 00011 10100 00000  
 00000 ?0000 00?00 10-00 -?0?1 10000 11110 01010 0-011 110-1  
 01001 1100? 00010 00101 -1-20 11100 11-10 00001 11000 02-21  
 00001 000-0 11100 0??0? 1000? 0????? ?????? 20110 0100? ??????  
 ?1100 11100 01100 00??0 10001 10010 ?0000 0-010 0110? 00100  
 01100 000

*Pucadelphys*

00100 00000 00000 00000 01010 10?2? 0100- 00000 00000 0101-  
 -0000 00000 01011 10100 20121 12210 11011 11220 22110 100--  
 00110 00010 11111 30123 12000 10013 01002 11000 11100 01111  
 0001- 11111 00011 00000 01100 01000 00101 0????1 11100 00000  
 00000 00000 00010 10-00 -2011 000?0 1120? ?1?10 0-111 110-1  
 01001 11001 00010 00101 -1-20 11100 10210 00001 01000 02-21  
 00000 000-0 11100 0??0? 1000? 0120? 01??? 20110 00000 100??  
 ?1100 10100 01100 0????0 00001 10000 ?0000 ?-0?0 ?1100 00100

01100 000

*Eomaia*

00010 00000 000?0 00?00 00010 10?0? 10010 10001 01??? ?010  
 01001 0?00? 100C1 0?1?0 ?002? A0100 ?00?? 11110 12??? 0?0--  
 001?1 010?0 10?01 ?02?? 01?00 00021 01011 12011 00200 01001  
 02001 01011 00011 ?00?? 010-1 00?1? ?0??? ???? ???? 0?000  
 01??? ????? ????? ????? ????? 0?0?0 ????? ????? ????? ?????  
 ????? 1???? 0???? ????? ????? ????? 11??? ????? ????? ????? ?????  
 ????? ????? ????? ????? ????? ????? ????? ????? ????? ?0???  
 ?00?0 ?00?? ?110? 000?? 0???? 1?0?1 1?0?? ????? 11?0? ?0??1  
 0?00? ???

*Prokennalestes*

000?0 0?0?? ????? ????0? 0???? 0??0? 1???? 10001 B1000 00000  
 0B00B 000B0 100L1 00110 00102 00100 00001 11110 12000 000--  
 00100 00000 10011 00211 11000 00011 01011 12011 00200 010?1  
 00001 010?? ?0011 ?1??? ????? ????? ???? ???? ???? ?0?0  
 ????? ????? ????? ????? ????? ????? 11B?? ????? ????? ?????  
 ????? ????? ????? ?1100 00?00 111?0 00111 0000? ?1100 00100  
 00000 ?00-0 00??? ????? 1?00? ?02?? ?11?0 ????? ????? ?????  
 ????? ????? ????? ????? ????? ????? ????? ????? ????? ?????  
 ????? ???

*Murtoilestes*

00??? ????? ????? ???? ???? ???? ???? ???? ???? ????  
 -???? ????? ?0011 1?210 00102 11100 00001 11120 12000 000--  
 0?1?? 00010 1?011 10211 11000 0???? ????? ???? ???? ????  
 ????? ????? ????? ????? ????? ????? ???? ???? ???? ????  
 ????? ????? ????? ????? ????? ????? ???? ???? ???? ????  
 ????? ????? ????? ????? ????? ????? ???? ???? ???? ????  
 ????? ????? ????? ????? ????? ????? ???? ???? ???? ????  
 ????? ????? ????? ????? ????? ????? ???? ???? ???? ????  
 ????? ???

*Bobolestes*

000?0 0?0?? ????? ????0? 0???? 1?0?0? 1???? ????? ???? ?0000  
 00001 20000 10011 0?200 10022 A1100 10011 11221 12010 100--  
 00100 00000 10011 10211 11000 0002L 01?00 1?01? ????? ?????  
 01000 021?? ????? ????? ????? ???? ???? ???? ???? ????  
 ????? ????? ????? ????? ????? ????? ???? ???? ???? ????  
 ????? ????? ????? ????? ????? ????? ???? ???? ???? ????  
 ????? ????? ????? ????? ????? ????? ???? ???? ???? ????  
 ????? ????? ????? ????? ????? ????? ???? ???? ???? ????  
 ????? ???

*Montanalestes*

00A?? ??G?? ????? ????? ???? ????A? 1???? ????? ???? ????  
 ?1001 10001 110?? ????? ????? ???? ???? ???? ????  
 ????? 01000 10011 10211 11000 000K3 01002 12011 00201 01011  
 0C01- 021?? ????? ????? ????? ???? ???? ???? ???? ????  
 ????? ????? ????? ????? ????? ????? ???? ???? ???? ????  
 ????? ????? ????? ????? ????? ????? ???? ???? ???? ????  
 ????? ????? ????? ????? ????? ????? ???? ???? ???? ????  
 ????? ???

????? ?????? ?????? ?????? ?????? ?????? ?????? ?????? ?????? ??????  
?????? ???

*Sheikhdzheilia*

00???? ?????? ?????? ?????? ?????? ?????? ?????? ??????K ?????? ??????  
?????1 010?1 10012 10102 00021 01111 10210 11221 22010 200-0  
0?1?? 000?0 10011 K1223 ?2000 0?A?2 0????? ?????? ?????? ??????  
?????? ?????? ?????? ?????? ?????? ?????? ?????? ?????? ?????? ??????  
?????? ?????? ?????? ?????? ?????? ?????? ?????? ?????? ?????? ??????  
?????? ?????? ?????? ?????? ?????? ?????? ?????? ?????? ?????? ??????  
?????? ?????? ?????? ?????? ?????? ?????? ?????? ?????? ?????? ??????  
?????? ?????? ?????? ?????? ?????? ?????? ?????? ?????? ?????? ??????  
?????? ???

*Alostera*

00???? ?????? ?????? ?????? ?????? ?????? ?????? ?????? ?????? ??????  
?????? ?????? ??012 1?202 10022 22111 10211 11221 22110 22200  
0?1?? 0?0?0 1?011 31223 ?2000 0????? ?????? ?????? ?????? ??????  
?????? ?????? ?????? ?????? ?????? ?????? ?????? ?????? ?????? ??????  
?????? ?????? ?????? ?????? ?????? ?????? ?????? ?????? ?????? ??????  
?????? ?????? ?????? ?????? ?????? ?????? ?????? ?????? ?????? ??????  
?????? ?????? ?????? ?????? ?????? ?????? ?????? ?????? ?????? ??????  
?????? ?????? ?????? ?????? ?????? ?????? ?????? ?????? ?????? ??????  
?????? ???

*Lainodon*

00???? ?????? ?????? ?????? ?????? ?????? ?????? ?????? ?????? ??????  
?????? ?????? ??0?? ?????? ?????? ?????? ?????? ?????? ?????? ??????  
?????? 00100 10011 31223 ?2000 0????? ?????? ?????? ?????? ??????  
?????? ?????? ?????? ?????? ?????? ?????? ?????? ?????? ?????? ??????  
?????? ?????? ?????? ?????? ?????? ?????? ?????? ?????? ?????? ??????  
?????? ?????? ?????? ?????? ?????? ?????? ?????? ?????? ?????? ??????  
?????? ?????? ?????? ?????? ?????? ?????? ?????? ?????? ?????? ??????  
?????? ?????? ?????? ?????? ?????? ?????? ?????? ?????? ?????? ??????  
?????? ???

*Avitotherium*

00???? ?????? ?????? ?????0? ??????0 1??1? ?????? ?????? ?????? ?????0-  
-000? ?????? ??012 1?202 10022 C2111 10211 11221 22010 K1100  
0?1?? 00100 21001 31221 ?2000 1????? ?????? ?????? ?????? ??????  
?????? ?????? ?????? ?????? ?????? ?????? ?????? ?????? ?????? ??????  
?????? ?????? ?????? ?????? ?????? ?????? ?????? ?????? ?????? ??????  
?????? ?????? ?????? ?????? ?????? ?????? ?????? ?????? ?????? ??????  
?????? ?????? ?????? ?????? ?????? ?????? ?????? ?????? ?????? ??????  
?????? ?????? ?????? ?????? ?????? ?????? ?????? ?????? ?????? ??????  
?????? ???

*Gallolestes*

00???? ?????? ?????? ?????? ?????? ?????? ?????? ?????? ?????? ??????  
??001 2????? ?10?? ?????? ?????? ?????? ?????? ?????? ?????? ??????  
??1?? 00000 21001 30223 12000 10??2 ?????? ?????? ?????? ??????  
?????? ?????? ?????? ?????? ?????? ?????? ?????? ?????? ?????? ??????  
?????? ?????? ?????? ?????? ?????? ?????? ?????? ?????? ?????? ??????  
?????? ?????? ?????? ?????? ?????? ?????? ?????? ?????? ?????? ??????  
?????? ???

????? ????? ????? ?????? ?????? ?????? ?????? ?????? ?????? ??????  
 ?????? ?????? ?????? ?????? ?????? ?????? ?????? ?????? ?????? ??????  
 ?????? ???

*Parazhelestes*

000?? ?????? ??????0 ?0?00 ?????? B0?0? 1????? 10001 11000 01001  
 00100 21?0? 10012 21212 10022 22111 10211 11221 22111 22200  
 00100 00000 21111 21223 02000 10012 01??? 1201? ?????? ??????  
 ???1- 121?? ?????? ?????? ?????? ?????? ?????? ?????? ?????? ??????  
 ?????? ?????? ?????? ?????? ?????? ?????? ?????? ?????? ??????  
 ?????? ?????? ?????? ??10K -0?20 1?1?? 00210 0100? ?????? 0A?0?  
 0000? 000-? K????? ?????? ??00? ?020? 111?0 ?0??? ?????? ??????  
 ?????? ?????? ?????? ?????? ?????? ?????? ?????? ?????? ??????  
 ?????? ???

*Aspanlestes*

000?0 ??G?? ?????? ?????? ?????? ???0? 1?1?0 1???01 11110 01000  
 00100 21001 10022 21212 10022 02111 10211 11221 22110 22200  
 001?? 000?0 11111 21223 02000 100L1 01??1 1201? ?????? ??????  
 ???1- 121?? ?????? ?????? ?????? ?????? ?????? ?????? ?????? ??????  
 ?????? ?????? ?????? ?????? ?????? ?????? ?????? ?????? ??????  
 ?????? ?????? ?????? ??10K -0?20 1?1?? 00210 0100? ?????? 0A?0?  
 0000? 000-? K????? ?????? ??00? ?020? 111?0 ?0??? ?????? ??????  
 ?????? ?????? ?????? ?????? ?????? ?????? ?????? ?????? ??????  
 ?????? ??

*Zhelestes*

00010 ?????? ?????? ?????? ??010 10?0? 1?101 10001 1111? 01001  
 00100 21??? 10022 21212 1002K 22111 1021A 11??? 22110 KK200  
 00100 00000 11111 21223 02000 10012 0?0?1 120?1 00200 01001  
 ???1- 121?? ???11 ?????? ?????? ?????? ?????? ?????? ?????? ??????  
 ?????? ?????? ?????? ?????? ?????? ?????? ?????? ?????? ??????  
 ?????? ?????? ?????? ??10K -0?20 1?1?? 00210 0100? ?????? 0A?0?  
 0000? 000-? K????? ?????? ??00? ?020? 111?0 ?0??? ?????? ??????  
 ?????? ?????? ?????? ?????? ?????? ?????? ?????? ?????? ??????  
 ?????? ???

*Paranyctoides*

000?0 ?????? ?????? ??????0? ??????1 1??0? 1????? 1A001 L2000 ?0001  
 01000 0B001 10011 10110 10D22 A1111 10011 11121 12111 11100  
 0?1?? 00000 10011 31221 12000 100N2 01??1 1?0?? ?????? ??????  
 ???1? 1????? ?????? ?????? ?????? ?????? ?????? ?????? ??????  
 ?????? ?????? ?????? ?????? ?????? ?????? ?????? ?????? ??????  
 ?????? ?????? ?????? ?????? ?????? ?????? ?????? ?????? ??????  
 ?????? ?????? ?????? ?????? ?????? ?????? ?????? ?????? ??????  
 ?????? ?????? ?????? ?????? ?????? ?????? ?????? ?????? ??????  
 ?????? ???

*Eozhelestes*

000?? ??0?? ?????? ??????0? ??????1 1??0? ?????? ?????? ?????? ?000B  
 ?1??? ?????? 1?0?? ?????? ?????? ?????? ?????? ?????? ??????  
 ?????? 00000 10011 10223 02000 1?0?2 ?????? ?????? ?????? ??????  
 0B0?? ?????? ?????? ?????? ?????? ?????? ?????? ?????? ??????  
 ?????? ?????? ?????? ?????? ?????? ?????? ?????? ?????? ??????

????? ???? ???? ???? ???? ???? ???? ???? ???? ????  
 ????? ???? ???? ???? ???? ???? ???? ???? ???? ????  
 ????? ???? ???? ???? ???? ???? ???? ???? ???? ????  
 ????? ??

*Cimolestes*

001E0 0?1?? ?????0 21?00 10010 10?1? 1?10- 10012 BB000 0010-  
 -0000 00000 10011 00102 10022 00101 10011 11221 12010 1BB00  
 00100 00000 00011 10211 120B0 0001L 01001 12001 0???? 000?0  
 0B01- 121?? ?11B ?10?? 0???? 01?11 0???? ????20 10??0 1????  
 ????? ???? ???? 10-?? ????? ???? ???? ???? ???? ????  
 ????? ???? ???? ???? ???? ???? ???? ???? ???? ????  
 ????? ???? ???? ???? ???? ???? ???? ???? ???? ????  
 ????? ???? ???? ???? ???? ???? ???? ???? ???? ????  
 ????? ??

*Maelestes*

000E0 0?1?? ?????0 ?100? 1?0A0 10?0? 10101 10011 02110 00111  
 10000 00010 10022 21202 10021 00101 10010 1100- 12010 11100  
 00100 00000 21111 10212 12100 00023 01002 12011 00200 00102  
 0001- 1???1 10011 00??? 0???1 0??10 00??? ?1102 10110 01000  
 01110 11000 0001? A000? ???0? 11??? 1111? 01121 20??? S???1  
 100?0 11001 00030 00100 00-01 11100 20211 00000 00100 1K?K0  
 01000 11111 K00B1 00?0? 00??1 00211 11110 E0110 0010? ?????  
 ?000? 10000 11100 ????? ???? ???? ????01 100?? ?11?? 0????  
 ????? ??

*Batodon*

001?? ?????? ?????? ????0? ?????0 1??1? 1???? 100?1 12000 ?010-  
 -0001 10001 10022 1?102 10021 21101 10011 11221 12010 11100  
 00100 00000 10111 K0212 1K000 00022 ?1??? ?????? ?????? ??????  
 0001- ?????? ?????? ?????? ?????? ?????? ?????? ?????? ??????  
 ?????? ?????? ?????? ?????? ?????? ?????? ?????? ?????? ??????  
 ?????? ?????? ?????? ?????? ?????? ?????? ?????? ?????? ??????  
 ?????? ?????? ?????? ?????? ?????? ?????? ?????? ?????? ??????  
 ?????? ?????? ?????? ?????? ?????? ?????? ?????? ?????? ??????  
 ?????? ??

*Bulaklestes*

001?? ?????? ?????? ????0? 0????0 0??1? 1???? 1000? ?????? ?000-  
 -0001 00001 10011 21112 10022 CA101 10011 11121 12001 100--  
 001?0 000?0 10011 10211 21000 00002 ?1??? ????1? ?????? ??????  
 0001- ?21?? ?????? ?????? ?????? ?????? ?????? ?????? ??????  
 ?????? ?????? ?????? ?????? ?????? ?????? ?????? ?????? ??????  
 ?????? ?????? ?????? ?????? ?????? ?????? ?????? ?????? ??????  
 ?????? ?????? ?????? ?????? ?????? ?????? ?????? ?????? ??????  
 ?????? ?????? ?????? ?????? ?????? ?????? ?????? ?????? ??????  
 ?????? ??

*Daulestes*

001?? ?????? ?????? ????0? ?????0 0??1? 1???- 10001 12000 0000-  
 -0001 01011 10011 1B100 00022 00101 10011 11121 12000 1BB00  
 0?1?? 000?0 20011 10211 ?1000 0?0?2 ????? ????1? ?????? ??????  
 ???1- ?????? ???1? ?????? ?????? ?????? ?????? ?????? ??????



????? ???? ???? ???? ???? ???? ???? ???? ???? ????  
 ????? ???? ???? ???? ???? ???? ???? ???? ???? ????  
 ????? ???? ???? ???? ???? ???? ???? ???? ???? ????  
 ????? ???? ???? ???? ???? ???? ???? ???? ???? ????  
 ????? ???

*Uchkudukodon*

001E0 0?A?? ?????A ???0? 000?0 00010 1???- 10001 02000 0??0-  
 -000? 0101? 10011 01110 00022 00101 10011 11121 12000 1BB00  
 0?100 00000 20011 10211 21000 0001T 01011 12011 00200 01001  
 0201- 121?? 0?011 000?1 110-1 00111 000?? ?0A02 10110 ?1000  
 01100 1J?00 000?0 2--01 0?002 10??? 1111? ??1?0 0-021 S00-1  
 ?00?0 11101 2?1?0 00100 00000 11100 ?1-1? 0000? ????? 1?????  
 ??00? ????? ????? ?00?0 ?000? ????? ????? ?0?10 0???? ??????  
 ????? ????? ????? ????? ????? ????? ????? ????? ????? ?????  
 ????? ???

*Kennalestes*

00100 0G1?0 00010 00?0? 00000 00010 1000- 10011 12110 0001-  
 -0000 01010 10021 20212 00022 00101 10011 11121 12001 11200  
 00100 00000 10111 10211 11000 00012 01002 12001 00200 00??1  
 0001- 12111 00011 010?0 ?10-1 01111 000?? ?0000 10110 0?000  
 0110? 10000 000?? 2--?1 0100? ??000 1111? 01?2? 20?11 300-1  
 000?0 11101 21?30 00101 -0001 11100 ?1-10 00000 0?1?1 1??A0  
 01002 11101 10011 0?1?0 0000? 00211 112-- 20?11 0???? ??????  
 ????? ????? ????? ????? ????? ????? ????? ????? ????? ?????  
 ????? ???

*Asioryctes*

00100 00000 00010 00?00 00000 00?1? 1000- 20011 22000 0001-  
 -1001 01010 10021 00102 10022 00101 10011 111D1 12001 100--  
 00100 00000 20111 10211 11000 00001 01002 12001 00200 01001  
 0001- 12111 00011 010?0 010-1 00111 00000 00??0 10110 00001  
 0110? 10000 000?? 2--01 0100C 10000 1111? 01110 20011 300-1  
 00010 11101 21?30 00101 -0001 11100 01-10 00000 0?111 1??A0  
 01002 11101 10011 001?0 0000? 0???? ?2-- 10111 00110 1?????  
 ????? ????? ????? 000?? ????? ????? ?0001 1?0?1 1111? 00??1  
 00000 0?0

*Ukhaatherium*

00100 00000 00010 00000 00010 10?1? 1001- 20011 22000 0001-  
 -1001 01010 10021 00102 10022 00101 10011 11101 12001 100--  
 00100 00000 20?11 10211 11000 00002 01002 12001 00200 01001  
 0001- ?2111 00011 01000 010-1 01111 00000 00??0 10110 00001  
 011?0 1?0?? 00??0 2--01 010?? 1?000 1111? 01110 200?1 ?00-1  
 00010 11101 21030 00101 -0001 11100 ?1-10 00000 0?1?1 1A1A0  
 01002 111?1 10001 00110 ?0001 002?? ?12-- 2011? ????? ??????  
 ?1000 10000 011?0 0?0?0 0??01 ?00?1 1?001 10011 12100 00101  
 0200? 220

*Deccanolestes*

00??? ?????? ?????? ???0? ?????0 1??1? 1????? 1011? ?????? ?001-  
 -000? 2100? ??021 10102 10022 A2111 10011 11220 12011 200-0  
 001?0 001?0 10011 112L1 11000 0?012 ?????? ?????? ?????? ??????

000?? ????? ?????? ?????? ?????? ?????? ?????? ?????? ?????? ??????  
 ?????? ?????? ?????? ?????? ?????? ?????? ?????? ?????? ?????? ??????  
 ?????? ?????? ?????? ?????? ?????? ?????? ?????? ?????? ?????? ??????  
 ?????? ?????? ?????? ?????? ?????? ?????? ?????? ?????? ?????? ??????  
 ?????? ?????? ?????? ?????? ?????? ?????? ?????? ?????? ?????? ??????  
 00111 100

*Kulbeckia*

00110 0G0?? ?????21 ?1?11 10000 0??1? 1000- 2?111 02000 0000-  
 -?001 211?1 10022 00202 10022 21111 10211 11121 22001 200--  
 001?0 00000 22111 L1222 11000 000L1 01??? 1210? ?????? ??????  
 0001- 12111 00011 0000? 0?0-? 00??? ?101? ??G?? ?????0 01000  
 0????? ?????? ???1? 10-?? ?????? ?????? 1???? ?????? ??????  
 ?????? ?????? ?????? ??10K -0?0B 1?1?0 11-11 0000? ???1? 011A0  
 0100? 111?1 1????? ?????? ??00? ??2?? ?11?0 ?0??? ?????? ??????  
 ?????? ?????? ?????? ?????? ?????? ?????? ?????? ?????? ??????  
 ?????? ???

*Zhangolestes*

000?0 0?1?? ?????1 ?1?21 1????1 11?0? ?????? ?????? ?????? ?0001  
 1????1 21??0 100?? ?????? ?????? ?????? ?????? ?????? ??????  
 ?????? 00000 1?011 31222 ??000 0?A?1 01??? ?????? ?????? ??????  
 0?0?? ?????? ?????? ?????? ?????? ?????? ?????? ?????? ??????  
 ?????? ?????? ?????? ?????? ?????? ?????? ?????? ?????? ??????  
 ?????? ?????? ?????? ?????? ?????? ?????? ?????? ?????? ??????  
 ?????? ?????? ?????? ?????? ?????? ?????? ?????? ?????? ??????  
 ?????? ?????? ?????? ?????? ?????? ?????? ?????? ?????? ??????  
 ?????? ???

*Alymlestes*

00??? ?????? ?????? ?????? ?????? ?????? ?????? ?????? ?????? ??????  
 ?????? ?????? ??0?? ?????? ?????? ?????? ?????? ?????? ??????  
 ?????? 00100 22101 31223 ??000 0????? ?????? ?????? ?????? ??????  
 ?????? ?????? ?????? ?????? ?????? ?????? ?????? ?????? ??????  
 ?????? ?????? ?????? ?????? ?????? ?????? ?????? ?????? ??????  
 ?????? ?????? ?????? ?????? ?????? ?????? ?????? ?????? ??????  
 ?????? ?????? ?????? ?????? ?????? ?????? ?????? ?????? ??????  
 ?????? ?????? ?????? ?????? ?????? ?????? ?????? ?????? ??????  
 ?????? ???

*Zalambdalestes*

00LB0 0T111 10?21 21121 10001 11?L? 1000- 21111 12000 1000-  
 -0001 21000 10022 00202 10021 21111 10210 1100- 22001 200--  
 00110 00100 22111 31223 12100 00011 01011 120A1 00200 00101  
 0001- 12111 00011 00000 110-1 00010 01010 00200 A0110 10000  
 01110 12001 10100 00001 01001 01B00 11110 01111 20011 300-1  
 000K0 11101 21030 00101 -0001 11100 11-10 00000 00101 111A0  
 01002 11111 K0000 00110 1000? 102?? ?1100 101?? ?00?1 1?????  
 ?11?? 100?0 ?????0 ?????? 01??? 100?? 0??K2 200?1 ?110K 01201  
 ?3011 2?0

*Barunlestes*

002B0 0?1?? ?????1 21121 10111 11?2? 1---- 20111 1200? 000--  
 -0??1 21000 10022 00202 10021 21111 10210 1100- 22001 200--

00110 00100 22111 31223 12100 001-1 01011 12001 00200 00101  
 0101- 121?? ?0?11 000?? ??0-1 00?11 0?0?? ?0220 10100 1?00?  
 ???1? 1M011 00??0 ????1 0?0?? ????0 11?1? ?1111 20011 30??1  
 000?0 11101 21030 00101 -0?01 11100 11-10 00000 0?1?1 1???0  
 01002 11111 ?0000 0????? 1?0?? 1????? ?????? ?0111 00?0? ??0?0  
 ?1??? 10000 1110? 00100 01211 1001? 0????? ?????? ?????? ??????  
 ?????? ???

*Gypsonictops*

00B?0 0?G?? ?????? ???0? 0????0 10?B? 1????? 2B112 22111 00001  
 0B1L1 21101 10022 10102 10022 21111 10011 11221 22011 22200  
 00100 00000 2L111 312L1 12000 00022 01??? 1200? ?0200 00???  
 ???1- 121?? ???11 ?????? ?????? ?????? ?????? ?????? ??????  
 ?????? ?????? ?????? ?????? ?????? ?????? ?????? ?????? ??????  
 ?????? ?????? ?????? ?????? ?????? ?????? ?????? ?????? ??????  
 ?????? ?????? ?????? ?????? ?????? ?????? ?????? ?????? ??????  
 ?????? ?????? ?????? ?????? ?????? ?????? ?????? ?????? ??????  
 ?????? ???

*Leptictis*

00130 03110 00000 00000 00011 10?10 1001- 11112 22111 0010-  
 -0001 21201 10022 00202 10022 21111 10211 11221 12011 21200  
 00110 00000 2L111 31221 12000 00012 01011 12001 00200 00112  
 0?01- 12111 00112 11101 11101 01011 00100 00020 11100 00001  
 01011 00000 00010 2--01 10001 00100 11111 11020 10121 20101  
 10020 11001 10011 00100 00001 11100 11-10 00000 1?100 01?10  
 01002 100-1 11110 00010 11001 00211 012-- 301?1 11??? ?0002  
 01111 00000 1110? 00010 10011 1002? 00102 20001 02102 00201  
 01111 210

*Purgatorius*

001?0 0?1?? 300?0 ?1?0? 0????0 1??1? ????- ?????2 K1000 0010-  
 -0002 00101 10022 K0202 10022 22K11 10211 11121 12112 22200  
 0?1?? 001?0 11011 11221 11000 00032 00??? ?????? ?????? ??????  
 ?????? ?????? ?????? ?????? ?????? ?????? ?????? ?????? ??????  
 ?????? ?????? ?????? ?????? ?????? ?????? ?????? ?????? ??????  
 ?????? ?????? ?????? ?????? ?????? ?????? ?????? ?????? ??????  
 ?????? ?????? ?????? ?????? ?????? ?????? ?????? ?????? ??????  
 ?????? ?????? ?????? ?????? ?????? ?????? ?????? ?????? ??????  
 ?????? ???

*Protungulatum*

001?? 0????? ?????0 ?0?00 0?010 10?1? 2???- 10112 B1110 0010-  
 -1001 10001 11022 10202 10022 22211 10211 12110 22102 22200  
 00110 00B00 11011 11L13 12000 100LL 01002 12001 00201 00102  
 0001- 121?? ?????? ?????? ?????? ?????? ?????? ?????? ??????  
 ?????? ?????? ?????? ?????? ?????? ?????? ?????? ?????? ??????  
 ?????? ?????? ?????? ??000 00?01 1?1?0 01-10 ???0? ?211? 0K?K0  
 01002 10101 1????? ?????? 1?00? ?0201 112-- ?0??? ?????? ??????  
 ?????? ?????? ?????? ?????? ?????? ?????? ?????? ?????? ??????  
 01110 120

*Oxyprimus*

001?? ?????? ?????? ?????? ?????? ???1? ????- ?????? ?????? ?????-

-1001 20001 11022 10202 10022 22211 10211 12110 22102 22200  
 001?0 00000 11011 11L12 12000 10A?1 01002 12001 00??? 00???  
 ????? ????? ????? ????? ????? ????? ????? ????? ????? ?????  
 ????? ????? ????? ????? ????? ????? ????? ????? ????? ?????  
 ????? ????? ????? ????? ????? ????? ????? ????? ????? ?????  
 ????? ????? ????? ????? ????? ????? ????? ????? ????? ?????  
 ????? ????? ????? ????? ????? ????? ????? ????? ????? ?????  
 ????? ???

*Vulpavus*

00L00 02100 00000 00000 00010 10?L? 0111- 00011 23000 0011-  
 -0000 0000? 12022 00202 10022 22111 10211 1100- 22101 111B1  
 00110 01100 21011 11221 31000 010LL 0?001 1?00? 00000 01112  
 ??01- 1??11 B0110 01L01 01100 01111 001?0 ?01D? ????? 1?001  
 0A?0? ????? ?????0 00011 0?01? 01001 111?? 110?0 ???21 20111  
 000?0 1100? 01130 00000 00-0? 11010 ?1-12 00010 2A1A0 010A0  
 00000 100-1 K1010 2???? 1?00? ????? ?????? ?0??? ?????? ??00?  
 ?1?00 1?000 01100 00B?? ?1011 1001? ??002 20001 02101 00201  
 02011 100

*Miacis*

00100 02100 00000 00000 0?010 10?1? 0111- 00001 23000 101?-  
 -0001 00000 12022 00202 10022 21011 10211 1100- 22100 1DB01  
 00110 01100 10011 11102 31000 01A?1 0100? 10000 ?0??? ?1111  
 ???1- 1P1?? ?????10 012?1 0?10? ?????? ?????? ?????2 0???0 ??????  
 ??10? 10000 00110 000?1 0?010 010?1 11111 ?1010 11?21 T0111  
 000?0 11000 111N0 00000 00-01 11010 ?1-12 00011 11100 0????0  
 00000 10101 K1000 2???? 1?00? ?????? ?????? ?0??? ?????? ??001  
 0???? 10?00 0???? 0?00? ?????? 1???? ?000? ?????? ??1?1 ?0???  
 ?????1 ???

*Gujaratia*

00100 021?0 000?0 40000 00011 10?1? 2001- 20012 00110 0011-  
 -0002 01001 11112 00202 10022 22111 10211 11221 22102 22300  
 00100 000?0 21011 12222 12000 1002L 01001 10000 00300 001A2  
 000?? ?????11 10111 010?0 01101 01011 00??? ?????? 103-0 30000  
 00?0? 02001 00111 00001 00000 00001 1111? ?1?10 10021 200-1  
 00010 1100? ??130 00000 00-?? ?1?1? ?1-?? 0?01? ?????? ??????  
 ???02 ?????? ?11A0 102?0 1000? ?????? ??2-- 30??? ??????1 ???01  
 0???? 10011 ??11? 01010 1??11 1?121 00012 21001 02012 01101  
 01210 110

*Hyopsodus*

00130 02101 00000 00000 00111 10?10 2110- 10012 00110 0010-  
 -0B12 21100 11112 00202 10022 22111 10211 20220 22101 2232B  
 00110 B0000 21011 12222 21000 100H2 01011 10100 00C01 00111  
 0?01- 12111 10111 00001 11100 01011 ?0120 00G00 103-0 00000  
 0000? ?00?0 00??? 2--01 1?0?1 11001 11101 11010 10021 201-1  
 00020 11000 10110 01000 00-0? 11010 11-10 01010 02A?0 02-?0  
 01002 00101 K101? 10???? 1?00? 00201 ?11?? ?0??? 111?0 ?1?02  
 00101 11000 11111 01010 1100? 10021 00001 21001 02112 00201  
 01110 100

*Meniscotherium*

00110 02100 40000 40000 00111 10?10 2001- 20012 20111 0011-  
 -0002 21100 11212 00201 11022 22111 11212 20201 22101 22321  
 00110 00000 11011 12220 31-00 00002 11012 10000 00001 00112  
 0011- 12111 1011L 0100B 01100 01011 00121 ?0A02 00000 0?000  
 0001? 00010 00??0 00001 100?2 10001 1110? ?1010 10?K1 20111  
 00?20 11000 10130 01000 00-01 11010 11-10 01000 01100 02-??  
 0?002 10101 K0?11 1???? 1?00? 0????1 ??1?? ?0?01 11101 11002  
 01111 10010 11111 01010 11111 10021 00001 20000 02100 00201  
 01111 120

*Phenacodus*

00100 02110 40000 40000 00011 10?1? 2010- 210?2 20111 0?11-  
 -0H02 21L00 1B112 00201 11022 22211 11212 20220 22102 22321  
 00110 00100 21011 12222 11000 10002 0100B 1000? 00001 00112  
 0?0?? ????11 1011L 0000? 01100 01011 00121 00220 ?03-0 0000B  
 0000? 00000 00101 2--01 1?002 1??01 1110? ???10 10?21 20111  
 00?20 11000 10130 0100? -002K 11010 11-10 01000 0?1?? 02-?1  
 0?002 100-1 2100A 10??? 1?00? 0???? ??100 F0?01 111?? ?1002  
 0111? 10010 11111 01010 10111 10121 00002 2?001 021?0 00201  
 01?11 2?0

*Ptilocercus*

00200 03110 00002 11000 10101 10020 0000- 10011 02010 0-----  
 -0002 21001 10012 20202 10022 12211 10011 0100- 22111 12201  
 00100 00010 11021 31223 12000 10031 01001 12000 00200 00102  
 0001- 13111 20010 11200 01110 01101 00100 00000 11300 10001  
 11111 10010 00110 00111 01002 01110 11101 11010 10021 20101  
 00000 11001 10110 00000 10-11 11102 11-12 10100 21110 0A111  
 00002 000-1 20110 01010 11001 00211 112-- 30101 111?1 1A101  
 01111 00100 01100 00001 11000 10011 00002 21011 02102 00101  
 12111 100

*Plesiadapis*

00TB1 03101 30001 01020 -0L12 -0?T- 20B0- 2B012 L011B 0-----  
 -0000 B1L00 11122 B0202 1B022 22L11 10211 01220 22102 22320  
 001B0 01000 21021 31221 02000 10032 10002 12000 00200 01102  
 1101- 13111 20112 00201 11101 00101 00000 00000 113-0 10000  
 00010 ?0011 001?0 2--01 0?01? 12000 1111? 1112? 20011 200-1  
 10020 11000 10110 00020 00-21 11100 11-12 10000 31??C 02-21  
 11112 00201 K1110 01101 1000? ????? ??2-- 30?11 1???? ??001  
 01??? 00000 01100 00??? 110B0 1?01? ??002 20011 01100 10201  
 12111 101

*Northarctus*

00100 03200 40000 40000 00010 10010 2011- 20002 L0110 0010-  
 -0B02 21100 11122 10202 10022 22111 10211 01221 22101 22320  
 00110 1----- -1021 22222 02000 10012 1B00L 12000 00200 00102  
 1B11- 13111 10110 00111 01100 01101 10100 00000 013-0 00000  
 1001? 000?? 0???0 00111 0?0?A 12000 1110? 11110 200?1 200-1  
 100?0 11000 00110 00020 10-11 11102 11-12 10100 3111? 0A11?  
 11112 00201 K1110 01001 1000? ?????1 1?2-- 30?11 111?? ?0001  
 0??0? 00100 01100 0010? 10?00 10021 00002 21010 0210? 11101  
 12211 221

*Adapis*

00130 03200 40000 40000 00B11 10010 2010- L0002 20110 0010-  
 -0002 21100 11122 B0202 10022 22L11 10211 01200 22101 22320  
 00100 1----- -1021 22220 02-00 10012 10001 10000 00300 10102  
 1B11- 13111 101BB 00211 01100 01101 10100 00010 113-0 0000B  
 00011 00011 011?0 00111 0?010 12000 1110? 11010 20011 210-1  
 10010 11000 00110 00020 10-11 11102 11-12 10100 311?? 0A11?  
 11112 00201 K1110 01001 10001 0??0? ??2-- 30?? ???? ????  
 ????? ???? ?10? 00??? 1???? ???? ???? 21010 02101 11101  
 12211 121

*Tribosphenomys*

00321 14301 221-1 21131 -02-2 --?3- 2----- 0002? ????? ?-----  
 --?0 210-0 10122 00202 10022 22211 122-1 01220 22102 2031-  
 00111 1----- -2131 31221 02010 001-2 100?1 02100 ?02?? 0??1  
 0101- 131?1 ??-11 10??? ?????? ?????? ??-?? ?????? ?????? 10???  
 ??1?? ?????? ?????? ?????? ?????? ?????? ?????? ?????? ??????  
 ?????? ?????? ?????? ?????? ?????? ?????? ?????? ?????? ??????  
 ?????? ?????? ?????? ?????? ?????? ?????? ?????? ?????? ??????  
 ?????? ?????? ?????? ?????? ?????? ?????? ?????? ?????? ??????  
 ?????? ?????? ?????? ?????? ?????? ?????? ?0002 21001 01102 00201  
 01111 1?0

*Paramys*

00321 14301 221-1 21131 -02-2 --?T- 2----- 00022 20111 0-----  
 ----0 211-0 101B3 3----- -1--2 22211 -22-2 2-220 22102 22320  
 00111 1----- -2131 32221 01010 00B32 10011 02100 00C?? 01022  
 0101- 13111 20-11 10200 01100 01111 10-01 00002 113-0 20000  
 0001? ?3011 001?0 2--01 01000 01000 11101 11020 20020 20111  
 02120 01200 00130 00100 00-01 11100 01-10 10000 01200 00111  
 01002 100-1 11110 20?00 1000? 0???? ?2-- ?0?01 1110? ?0001  
 0??0? 0000B 011?1 0?00? 11211 10021 00002 20001 01102 00201  
 01111 210

*Rhombomylus*

00321 14301 221-1 21131 -02-2 --?3- 2----- 2B0?2 B1020 0-----  
 -0112 20200 11123 3----- -0--0 21201 -22-2 0100- 22102 2032-  
 1?111 1----- -1101 31211 12000 0003L 10001 12100 00210 00002  
 0101- 12111 20-11 10200 01100 01111 10-01 00002 003-0 10000  
 10111 01011 00100 00011 01012 12000 11111 11120 20021 20A01  
 02120 01100 002M0 00102 ---21 1110L 11-12 10010 31202 02-2?  
 01002 000-1 210B0 20211 10000 00201 012-- 201?? ?1?? ?0?1  
 ?1?01 10000 11101 0???? 11011 10121 00002 21001 01102 00211  
 01110 120

*Gomphos*

00T21 13201 21101 21131 102-2 --?T- 2----- 210?2 10000 0-----  
 -0220 21200 10123 3----- -1--0 22211 -22-2 01020 22102 2032-  
 0?111 1----- -1131 31221 02010 00032 10001 12100 00210 01002  
 0101- 12111 20-11 10100 01?01 ??111 10-?1 00?02 003?0 10000  
 1011? 010?? 00??0 2--01 ??0?? 0???? 1111? 11010 10??1 201?1  
 03110 01200 00210 ?0002 ---?? ?1??? ?????? ?????? ??????  
 ?????? ?????? ?1??0 ?0210 1000? ?????? ?????? 30??1 11??? ?????0  
 0110? 001?0 11??? ?????? 10?11 1?1?1 00002 20001 02102 01111  
 01111 100

*Mimotona*

00T21 13201 21101 21131 102-2 --?T- 2---- 20002 00000 0----  
 -0000 21000 10123 3---- -B--0 22211 -22-2 0100- 22102 2032-  
 0?101 1---- -11?1 31221 02000 0003? 1???? ?10? ????? ?????  
 01??? ?????11 K0-11 10??? ?1?? 01?1? ??-?1 ????? ?????? 00000  
 0?1?? ?????? ?????? ?????? ?????? ?????? ?????? ?????? ??????  
 ?????? ?????? ?????? ?????? ?????? ?????? ?????? ?????? ??????  
 ?????? ?????? ?????? ?????? ?????? ?????? ?????? ?????? ??????  
 ?????? ?????? ?????? ?????? ?????? ?????? ?????? ?????? ??????  
 ?????? ???

*Blarina*

00T30 02S11 201A1 11031 0011K ?1?T? 0---- 10021 20020 1----  
 -0002 22-00 10011 00200 11020 22211 11010 0100- 12110 1022-  
 11110 00110 11121 31123 32000 011-3 01002 00000 00000 10111  
 0101- 13111 10112 01111 01111 01101 ?0??0 ?0201 10100 011--  
 -21?0 0?1?? ?????10 2--1 2?00? 10000 11111 11010 10021 S00-1  
 100-? 10-?? 11130 00010 00-01 11100 31-12 00000 01101 00010  
 00002 11201 21010 00100 10010 0?101 012-- 00?01 11100 1A000  
 01001 10000 01100 00011 10010 10011 00102 20001 12100 00201  
 01110 1?1

*Erinaceus*

00T00 02211 000B1 01000 10101 110T0 0---- B00B1 00010 0----  
 -0002 20000 10012 00202 10002 22211 -0210 0100- 22010 22320  
 11110 00100 21121 31220 32-00 11B3T 01012 10000 00300 10102  
 0101- 13111 20010 01111 11111 1?-01 10120 01001 11100 10010  
 1111- 01011 10B00 2--01 00100 02000 11111 11010 10021 200-1  
 04020 111?1 10011 10010 00-01 11100 11-10 10100 21000 00110  
 01000 11101 21010 20100 B0001 00201 ?1110 T0101 11110 11001  
 01101 10011 01100 00111 10201 10011 00102 21011 01112 01201  
 01010 110

*Solenodon*

00230 02101 30012 00000 00101 10?2? 1000- 10011 02010 0----  
 -0001 20000 10020 00202 00122 13--1 12011 1100- 12010 0011-  
 00100 00000 20100 10000 30-00 00013 01002 11000 00301 11101  
 0101- 13111 1011D 11111 11111 01111 00120 00011 11100 001--  
 -2111 01011 10000 2--1 00000 00001 11110 11010 0-021 20111  
 100-0 110?1 21130 00000 00-01 11100 11-11 00000 01100 01110  
 01002 11201 21100 00110 10011 0???? ?2-- 30101 11010 11102  
 01101 01000 01101 01001 10010 10011 00002 21001 0211? 00201  
 01010 211

*Eoryctes*

002?0 0?S?? ?????? ????0? ?????0 1??2? 1????? 10011 22000 1----  
 -0001 000?0 10022 00202 10022 A0101 10211 2000- 120?0 100--  
 0?100 000?0 20001 10203 ?2000 0?0T2 ?????? ?????? ?????? ??????  
 010?? ?????? ????10 01??? 0?10? 11?11 0????? ?0?22 10100 ?0???  
 ?2???? ?????0 0?0?? 2--?1 0?00? 00?00 1111? 11??0 ???21 20111  
 100?0 110?1 K0111 101?0 10-1? 1110? ????12 10100 21100 0A110  
 01000 11101 ?1000 ?01?0 1???? ?????? ?????? ?0???? ?????? ??????  
 ?????? ?????? ?????? ?????? ?????? ?????? ?????? ?????? ??????

????? ???

*Potamogale*

00230 02101 20002 30000 10101 10020 2000- 20012 21000 0----  
 -1101 20011 10021 10202 21022 12001 10011 1100- 22000 100--  
 00100 00000 21111 10200 32-00 00013 01002 00000 00000 00101  
 0201- 13111 10112 10111 01111 1--11 1-100 00321 00000 001--  
 -210- 00100 00100 2---1 00110 11010 11110 11010 0-021 20111  
 100-0 110?0 21121 11010 00-01 11000 11-11 00001 11101 01110  
 01000 10201 21010 00110 10011 00201 11100 00101 11110 11100  
 01010 11011 01100 00011 11001 0?021 00101 200?1 11102 01??1  
 ?0010 2?0

*Orycteropus*

01T-- -54-- ----- -2-2 --?T? 2----- ---0- ----- 0-----  
 ----- ---0- 10-0- ----- -100R 01011 00100 00300 10102  
 ----- ----- -----  
 0201- 13110 01-B2 01011 11101 00101 20-20 00401 10101 00000  
 01000 00100 00010 00001 01000 00000 11100 11010 0-021 200-1  
 04120 10--0 20110 00200 00-01 11010 11-10 00000 01110 01101  
 01002 100-1 11110 00110 10001 02202 -12-- R01?1 1110? ?0002  
 01101 11100 11100 01010 10111 1102? 11012 20101 11100 002?1  
 01?11 2??

*Rhynchocyon*

00210 051-- ---10 31000 11001 00010 2001- 12011 22020 1001-  
 -11B2 21200 22203 3----- -0--0 21211 -02-1 0100- 22101 100--  
 0-1-- 00001 11031 22220 -2-00 0-012 01110 00000 00300 10102  
 0201- 13111 00110 01101 11101 00111 00120 00021 01001 00001  
 01000 00100 00010 01001 01110 20000 11210 11010 11021 200-1  
 04020 01010 10111 10?10 10-11 11000 31-10 10100 11202 ?011?  
 0????1 0?201 K?100 00111 11011 00211 112-- 20101 11110 10001  
 01111 11010 11100 01010 10011 10121 11112 21101 12112 01221  
 01010 201

*Procapra*

00121 B4201 221-0 31000 102-2 --?1? 2020- 22032 20120 0000-  
 -1212 21100 10203 3----- -1--0 21211 -12-1 2300- 22101 12320  
 23101 00001 01111 11220 32-01 00001 11112 00100 00301 10102  
 0211- 12111 11-11 10001 11100 01011 00-20 00B0B B1001 B0000  
 00011 01011 000B0 01011 01012 00010 11211 11010 11021 21101  
 04100 10--0 20110 01001 -0021 11100 11-10 00000 01200 02-21  
 00002 000-0 21010 10211 11001 02100 112-- 01101 11100 11002  
 01120 10011 11110 01010 10111 1B121 01102 20111 11012 01221  
 03010 220

*Moeritherium*

00211 B2202 00010 21000 10112 --??? 2----- 22012 20110 0-----  
 -1212 21110 11103 3----- -0--0 22211 -02-0 2300- 22101 22321  
 00101 1----- -1121 42221 02001 001-1 10113 10101 00001 00102  
 0011- 1??11 10111 ?0100 01100 1--?? ?-000 001B1 10000 20010  
 10?1- 1?001 10100 2--01 0?010 00100 11100 11010 00011 ?1101  
 04000 00-?0 001?0 0????? ?????? ??01? ?????? ?????? ??????  
 0??02 ?????? ?102- 0???? 1?0?? ?0?12 -0???? ?1?01 11100 ?1102



01120 11011 011?? ????? ?0011 0001? ????? ?????? ?????? ??????  
 ?????? ???

*Chaetophractus*

01130 054-- ---0- ----- --111 1-?-- -----  
 -----  
 ----- --000 00012 00101 00300 10112  
 0201- 13111 0111- 10100 10101 01001 00100 103-1 00200 -0000  
 00011 01011 00110 2--01 02001 20100 11111 11020 0-121 200-1  
 03120 11111 20110 00101 -0121 11101 21-11 00000 12210 02-20  
 01002 000-1 10111 00211 11001 00200 01010 00101 11101 11112  
 11100 10100 01100 01011 10110 10021 01102 20000 01102 00201  
 01110 010

*Bradypus*

0133- -54-- ----- --112 --?-- -----  
 -----  
 ----- --003 10012 00101 00000 00102  
 1211- 13110 0102- -011B 01100 01101 00020 003-0 00200 -0000  
 02011 00011 00110 2--01 02010 00100 11201 11020 0-021 T00-1  
 10020 10--0 00110 00001 -0120 11100 21-11 00001 11210 02-20  
 01002 000-1 200B0 00210 11101 00102 -1101 00101 11101 01112  
 11010 00001 01100 00011 11201 00021 00003 20001 01002 01121  
 01001 000

*Tamandua*

1-----  
 -----  
 ----- --1-0 0-0-0 00-01 00000 11102  
 0201- 13111 -1-1- 01101 11101 0110B 00-20 003-1 0020- -0010  
 02-00 00000 00010 2--01 02010 20100 1120? 11120 0-021 200-1  
 10020 10--0 10010 00000 00-21 1110? ?1-1? 0000? ?????? ?2-2?  
 0?002 000-1 21011 00210 11001 00201 01L01 00?01 11100 11112  
 11000 00100 01100 01011 11001 00021 00002 20011 01002 00221  
 01011 000

```

*****
#NEXUS

BEGIN DATA;
  DIMENSIONS  NCHAR=408 NTAX=69;
  FORMAT SYMBOLS= " 0 1 2 3 4 5" MISSING=? GAP=- ;
  CHARSTATELABELS
    1 Teeth / present absent,
    2 Teeth_types /
'differentiated_into_morphological_types_(incisors,_canines,_premolars,
_molars)_with_enamel'
'simple_peg-like_teeth',
    3 Postcanine_loci / 8_or_more 7 6 5_or_less,
    4 Upper_diastema / 'narrow,_between_I/C' 'narrow,_between_C/P'
enlarged absent,
    5 'Lower diastema behind i''s' / absent_or_narrow enlarged,
    6 Incisor_shape /
root_and_crown_are_straight_and_continous_in_length
root_and_crown_form_a_continous_curve,
    7 Upper_incisors / 5 4 3 '2_(anterior)' '1_(anterior)'
'none_or_1-2_small_posterior',
    8 Lower_incisors / 4 3 2 1 none_or_small_posterior,
    9 Upper_anteriormost_incisors_aveoli / approximating
separated_by_broad_gap,
    10 Anteriormost_upper_incisor_size / subequal_to_subsequent
greatly_enlarged smaller_than_subsequent,
    11 Anteriormost_upper_incisor / conical 'medio-
laterally_compressed'
'antero-posteriorly_compressed' 'cusplate_(one_major_and_one_minor)'
spatulate,
    12 Upper_anteriormost_incisor_root / rooted
'hypsodont,_in_premaxilla' 'hypsodont,_in_maxilla',
    13 Enamel_distribution_on_upper_anterior_dentition /
surrounds_tooth
discontinuous_posteriorly,
    14 Ultimate_upper_incisor / in_premaxilla
between_premaxilla_and_maxilla in_maxilla,
    15 Lower_anteriormost_incisor_size /
'small,_subequal_to_subsequent'
greatly_enlarged 'tiny,_smaller_than_subsequent',
    16 Anteriormost_lower_incisor_shape / conical
mediolaterally_compressed anteroposteriorly_compressed
'cusplate_(subequal_cusps)' spatulate,
    17 Lower_anteriormost_incisor_procumbency / absent present,
    18 Lower_anteriormost_incisor_growth / determinate_ 'ever-
growing_',
    19 Lower_anteriormost_incisor_root_length /
not_extended_posteriorly_below_p1 extending_posteriorly_below_p1
extending_posteriorly_below_penultimate_or_ultimate_premolar
extending_posteriorly_below_molars,
    20 Lower_anteriormost_incisor_enamel / covers_the_tooth
discontinuous_posteriorly,
    21 Lower_post._incisors_procumbency / absent present,
    22 Staggered_lower_incisor / absent_present_,
    23 Upper_canine / present_and_enlarged_present_and_small_absent,
    24 Upper_canine_roots / two_one_,

```

25 Lower\_canine / present\_and\_enlarged\_ present\_and\_small\_ absent,  
 26 Lower\_canine\_roots / two\_ one\_,  
 27 Lower\_canine\_procumbency / absent present,  
 28 Deciduous\_canine / present absent,  
 29 Premolars / five\_ four\_ three two\_or\_less,  
 30 P1p1\_P2p2\_replacement / present absent,  
 31 'Tall, trenchant premolar' / in\_ultimate\_premolar\_position  
 in\_penultimate\_premolar\_position absent,  
 32 P1\_procumbency / absent present,  
 33 P1\_roots / double single three,  
 34 P1\_posterior\_diastema / absent present,  
 35 'P c roots (only for taxa with five)' / two one,  
 36 Penult\_upper\_premolar\_protocone / absent 'small,\_lingual\_bulge'  
 with\_enlarged\_basin,  
 37 Penult\_upper\_premolar\_metacone / absent swelling large,  
 38 'Penult upper premolar para/metastyle' / absent\_or\_weak  
 well\_developed,  
 39 Penult\_upper\_premolar\_roots / two three one four,  
 40 Ult\_upper\_premolar\_protocone / absent\_or\_narrow\_cingulum  
 smaller\_than\_paracone approaches\_paracone\_in\_height,  
 41 Ult\_upper\_premolar\_metacone / absent swelling large,  
 42 'Ult upper premolar para/metastylar lobe' / absent\_or\_vestigial  
 subequal\_parastylar\_larger metastylar\_larger,  
 43 Ult\_upper\_premolar\_precingulum / absent present,  
 44 Ult\_upper\_premolar\_postcingulum / absent  
 'present,\_but\_lower\_than\_protocone' forming\_hypoconal\_shelf,  
 45 Ult\_upper\_premolar\_conules / weak\_or\_absent prominent,  
 46 Ult\_upper\_premolar\_size\_to\_M1 / smaller\_or\_subequal larger,  
 47 p1\_orientation / in\_line\_with\_jaw\_axis oblique,  
 48 First\_lower\_premolar\_roots / two one,  
 49 'p1-p2 diastema' / absent\_  
 'present,\_subequal\_to\_one\_tooth\_root\_diameter',  
 50 'p c size (only for taxa with 5 premolars)' / longer\_than\_p2  
 shorter\_than\_p2,  
 51 'p c roots (only for taxa with 5)' / two one,  
 52 Penult\_lower\_premolar\_paraconid / vestigial\_or\_absent\_  
 distinctive\_,  
 53 Penult\_lower\_premolar\_metaconid / absent swelling separate,  
 54 'Penult lower premolar "talonid" cusps' / one two three,  
 55 Ult\_lower\_premolar\_paraconid / vestigial\_or\_absent  
 distinctive\_and\_low distinctive\_and\_high,  
 56 Ult\_lower\_prem\_metaconid / absent swelling separate,  
 57 Ultimate\_lower\_premolar\_talonid / narrower\_than\_anterior\_crown  
 as\_wide\_as\_anterior\_crown absent,  
 58 Ult\_lower\_premolar\_talonid\_cusps / one two three,  
 59 Length\_of\_ultimate\_lower\_premolar / longer\_than\_penultimate  
 equal\_or\_less\_than\_penultimate,  
 60 Ultimate\_lower\_premolar\_anterolingual\_cingulid / absent present,  
 61 Molars / four\_or\_more\_three\_two,  
 62 Molar\_size\_increasing\_posteriorly / absent  
 moderate\_posterior\_increase marked\_posterior\_decrease,  
 63 Molar\_cusp\_form / 'sharp,\_gracile' 'inflated,\_robust' 'crest-  
 like',  
 64 Upper\_molar\_shape / as\_long\_as\_wide  
 'wider\_than\_long\_(length\_more\_than\_75\_and\_less\_than\_99%\_width)'  
 'wider\_than\_long\_(length\_less\_than\_75%\_width)',  
 65 Upper\_molar\_stylar\_shelf / 50%\_or\_more\_of\_width\_

less\_than\_50%\_but\_more\_than\_25%\_less\_than\_25% absent,  
 66 Metastylar\_and\_parastylar\_lobe\_labial\_extent /  
 parastylar\_more\_labial subequal metastylar\_more\_labial lobes\_absent,  
 67 Upper\_first\_molar\_parastylar\_lobe\_position\_to\_paracone /  
 anterolabial anterior,  
 68 Parastylar\_lobe\_width / more\_than\_30%\_total\_width  
 less\_than\_30\_but\_more\_than\_20 20\_or\_less,  
 69 Preparastyle / absent present,  
 70 Stylar\_cusp\_A / subequal\_to\_larger\_than\_B  
 'distinct,\_but\_smaller\_than\_B' vestigial\_to\_absent,  
 71 Stylar\_cusp\_B\_to\_paracone / smaller\_but\_distinctive  
 vestigial\_to\_absent subequal,  
 72 'Stylar cusp C (mesostyle)' / absent present,  
 73 Stylar\_cusp\_D / absent smaller\_or\_subequal\_to\_B larger\_than\_B,  
 74 Stylar\_cusp\_E / 'directly\_lingual\_to\_D\_or\_D-position'  
 distal\_to\_D  
 small\_to\_indistinct,  
 75 Preparacingulum / absent  
 interrupted\_between\_stylar\_margin\_and\_paraconule  
 continuous\_with\_preprotocrista,  
 76 Deep\_ectoflexus / present\_only\_on\_penultimate\_molar  
 on\_penultimate\_and\_succeeding\_molars strongly\_reduced\_or\_absent,  
 77 Metacone\_size\_to\_paracone / noticeably\_smaller slightly\_smaller  
 subequal\_or\_larger absent,  
 78 Metacone\_position\_to\_paracone / labial  
 approximately\_at\_same\_level lingual,  
 79 Paracone\_and\_metacone\_bases / adjoined separate,  
 80 Preparacrista / strong weak\_or\_absent,  
 81 Preparacrista / cusplate not\_cusplate,  
 82 Centrocrista / straight 'V-shaped' absent,  
 83 Postmetacrista / extends\_from\_side\_of\_metacone\_to\_metastyle  
 salient 'weak,\_from\_base\_of\_metacone,\_or\_absent',  
 84 Postmetacrista / cusplate not\_cusplate,  
 85 Preprotocrista / does\_not\_does\_extend\_labially\_beyond\_paracone  
 absent,  
 86 Postprotocrista / 'extends\_to\_mid-lingual\_surface\_of\_metacone'  
 extends\_to\_distal\_surface\_of\_metacone absent,  
 87 Postvallum\_wear /  
 'Present\_but\_only\_by\_the\_first\_rank:\_postmetacrista'  
 'second\_rank,\_does\_not\_extend\_labially\_passed\_metacone'  
 extends\_to\_metastyle absent,  
 88 Paraconule / weak\_or\_absent 'prominent,\_closer\_to\_protocone'  
 'prominent,\_midway\_or\_closer\_to\_paracone',  
 89 Metaconule / weak\_or\_absent 'prominent,\_closer\_to\_protocone'  
 'prominent,\_midway\_or\_closer\_to\_metacone',  
 90 Internal\_conular\_cristae / indistinctive 'distinctive\_and\_wing-  
 like',  
 91 Conular\_region\_width / 'narrow\_(less\_than\_.3\_total\_tooth\_width)'  
 'moderate\_(.31-.50\_total\_tooth\_width)'  
 'wide\_(more\_than\_.51\_total\_tooth\_width)',  
 92 Protocone / lacking 'small,\_without\_trigon\_basin'  
 'small,\_with\_distinct\_trigon\_basin' somewhat\_expanded\_anteroposteriorly  
 posterior\_portion\_expanded,  
 93 'Protocone antero-posterior expansion' / subequal\_to\_paracone  
 larger\_than\_paracone,  
 94 Procumbent\_protocone / absent present,  
 95 Protocone\_labial\_shift / 'no\_shift\_(10-20%)'

'moderate\_shift\_(21-30%)' 'substantial\_labial\_shift\_(more\_than\_31%)',  
 96 Protocone\_height / low 'tall,\_approaching\_paracone\_and\_metacone'  
 subequal,  
 97 Precingulum\_on\_upper\_molars / absent present  
 present\_and\_reaching\_labially\_passed\_paraconule,  
 98 Postcingulum\_on\_upper\_molars / absent present  
 present\_and\_reaching\_labially\_passed\_metaconule  
 extends\_to\_labial\_margin,  
 99 Hypocone\_on\_postcingulum / absent  
 'present,\_lower\_than\_protocone'  
 'present,\_subequal\_to\_protocone',  
 100 'Pre- and postcingulum' / separated continuous,  
 101 Upper\_molar\_roots / three four more,  
 102 Last\_upper\_molar\_roots / three two one four\_or\_more,  
 103 Lingual\_root\_on\_upper\_molars / supporting\_paracone  
 supporting\_trigon,  
 104 Last\_upper\_molar\_width\_to\_penultimate / subequal smaller,  
 105 Last\_upper\_molar\_metastylar\_lobe / absent present,  
 106 Paraconid / distinctive vestigial\_or\_absent,  
 107 Paraconid\_height\_to\_metaconid / shorter subequal taller,  
 108 Paraconid\_on\_lingual\_margin / absent present,  
 109 Mesiolingual\_vertical\_crest\_of\_paraconid / rounded  
 forming\_a\_keel,  
 110 Paracristid / notched continuous\_curve,  
 111 Trigonid\_configuration /  
 'open,\_paracristid-protocristid\_angle\_more\_than\_50\_degrees'  
 'more\_acute,\_angle\_between\_36\_and\_49\_degrees'  
 'anteroposteriorly\_compressed,\_angle\_less\_than\_35' paraconid\_absent,  
 112 Protoconid\_height / tallest\_cusp\_on\_trigonid  
 'subequal\_to\_paraconid\_and/or\_metaconid' smaller\_than,  
 113 Protocristid\_orientation / oblique transverse,  
 114 Mesio Buccal\_cingular\_cusp\_f / present  
 'present,\_with\_distinct\_posteroventrally\_directed\_cingular\_shelf'  
 'present,\_with\_shelf\_continuing\_along\_buccal\_border' absent,  
 115 Talonid / small\_heel multicuspidated\_basin,  
 116 Cristid\_obliqua / 'incomplete,\_with\_distal\_metacristid\_present'  
 'complete,\_attaching\_lingual\_to\_notch\_in\_protocristid'  
 'complete,\_attaching\_at\_or\_labial\_to\_notch\_in\_protocristid'  
 'complete,\_attaching\_below\_middle\_posterior\_of\_protoconid'  
 'complete,\_labially\_placed' absent,  
 117 Trigonid\_height / twice\_or\_more\_the\_height\_of\_talonid  
 less\_than\_twice\_the\_height\_of\_talonid subequal\_to\_trigonid,  
 118 Trigonid\_to\_talonid\_length /  
 'long\_(more\_than\_75%\_of\_total\_length)'  
 'some\_shortening\_(51-75%\_of\_total\_length)'  
 'anteroposterior\_compression\_of\_trigonid\_(50\_%\_or\_less\_of\_total\_length  
 )',  
 119 Talonid\_width\_to\_trigonid /  
 'very\_narrow,\_subequal\_to\_base\_of\_metaconid' narrower  
 subequal\_to\_wider,  
 120 Hypoconulid / absent\_in\_posteromedial\_position  
 lingually\_placed\_with\_slight\_approximation\_to\_entoconid  
 close\_approximation\_to\_entoconid,  
 121 Hypoconulid\_of\_last\_molar / short\_and\_erect  
 tall\_and\_sharply\_recurved\_posteriorly\_procumbent absent,  
 122 Entoconid / absent smaller\_than  
 'subequal\_to\_larger\_than\_hypoconid\_and/or\_hypoconulid',

123 'Postcristid (between entoconid and hypoconulid) taller than  
 hypoconulid and nearly transverse' / absent present,  
 124 Mesoconid / absent present,  
 125 Hypolophid / absent present,  
 126 Labial\_postcingulid / absent present,  
 127 Last\_lower\_molar\_size\_to\_penultimate / subequal\_or\_larger  
 smaller,  
 128 Number\_of\_mental\_foramina / two\_or\_more one,  
 129 Antermost\_mental\_foramen /  
 'below\_incisors\_(or\_antermost\_mandible)' below\_p1 below\_p2  
 more\_posterior,  
 130 Posteriormost\_mental\_foramen /  
 in\_canine\_and\_anterior\_premolar\_region below\_penultimate\_premolar  
 below\_ultimate\_premolar  
 at\_ultimate\_premolar\_and\_first\_molar\_junction\_or\_more\_posterior,  
 131 Depth\_of\_mandibular\_body / shallow\_and\_long deep\_and\_short,  
 132 Space\_between\_ultimate\_molar\_and\_coronoid\_process / absent  
 present,  
 133 Coronoid\_process\_height / higher\_than\_condyle  
 even\_with\_condyle,  
 134 Coronoid\_process\_width / 'broad\_(roughly\_2\_molar\_lengths)'  
 'narrow\_(subequal\_to\_or\_less\_than\_molar\_length)',  
 135 Tilting\_of\_coronoid\_process / '135-145' '110-125' 95\_to\_105  
 tilted\_anteriorly,  
 136 Coronoid\_crest / absent\_or\_weakly\_developed  
 present\_and\_laterally\_flaring,  
 137 Ventral\_border\_of\_masseteric\_fossa / absent\_or\_weakly\_developed  
 'present\_as\_low,\_broad\_crest\_more\_than\_half\_the\_height\_of\_the\_body'  
 'present\_as\_well\_defined\_crest,\_less\_than\_half\_the\_height\_of\_the\_body',  
 138 Anteroventral\_extension\_of\_masseteric\_fossa / absent  
 extending\_anteriorly\_onto\_body below\_ultimate\_premolar,  
 139 Labial\_mandibular\_foramen / absent present,  
 140 Condylod\_crest / absent present,  
 141 Posterior\_shelf\_of\_masseteric\_fossa / absent present,  
 142 Lower\_jaw\_angle / process\_on\_posterior\_ramus  
 medially\_inflected\_shelf\_on\_ventral\_ramus,  
 143 Lower\_jaw\_angle / posteriorly\_directed medially\_inflected  
 posteroventrally\_directed posterodorsally\_directed,  
 144 Lower\_jaw\_angle\_length / length\_less\_than\_ramus\_length  
 equal\_or\_greater\_than\_ramus\_length,  
 145 Lower\_jaw\_angle\_shape / 'tapers,\_base\_wider\_than\_tip'  
 'rounded,\_base\_as\_wide\_as\_tip',  
 146 Angular\_process\_vertical\_position / posteroventral\_border  
 'posterodorsal,\_near\_or\_above\_alveolar\_plane',  
 147 Angular\_process\_to\_condylar\_process /  
 level\_with\_or\_posterior\_to  
 anterior,  
 148 Condylar\_process / peduncle\_posteriorly\_directed\_absent\_,  
 149 Condyle\_shape / ovoid cylindrical anteroposteriorly\_elongate,  
 150 Condyle\_position\_to\_tooth\_row / at\_about\_same\_level  
 slightly\_above above\_by\_more\_than\_molar\_length,  
 151 Mandibular\_symphysis / tapered deep,  
 152 Mandibular\_symphysis\_posterior\_extent / p2\_  
 p3\_or\_more\_posterior  
 p1\_or\_more\_anterior,  
 153 Mandibular\_symphysis\_fused / absent present,  
 154 '"Meckel''s" sulcus' / present absent,

155 'Curvature of "Meckel"'s sulcus' / parallel\_to  
 convergent\_on\_ventral\_border\_of\_body,  
 156 '"Coronoid" facet' / present absent,  
 157 Mandibular\_foramen /  
 'anteriorly\_placed,\_near\_back\_of\_dentition'  
 'near\_ventral\_margin,\_at\_root\_of\_angle'  
 recessed\_dorsally\_from\_ventral\_margin near\_or\_above\_alveolar\_plane,  
 158 'Mandibular foramen dorsal to prominent, oblique subpterygoid  
 ridge' / present absent,  
 159 Septomaxilla / present absent,  
 160 'Premaxilla, posterodorsal process dorsal extent' / does\_not  
 does\_reach\_nasal,  
 161 'Premaxilla, posterodorsal process posterior extent' /  
 does\_not\_extend\_beyond\_canine extends\_beyond\_canine  
 contacts\_frontal\_posteriorly absent,  
 162 'Posterodorsal process of premaxilla with distinct finger-like  
 extension' / present absent,  
 163 Lateral\_margin\_of\_paracanine\_fossa / formed\_by\_maxilla  
 maxilla\_and\_premaxilla,  
 164 'Exit(s) of infraorbital canal' / multiple single canal\_absent,  
 165 Infraorbital\_foramen / dorsal\_to\_ult\_premolar  
 to\_penult\_premolar\_or\_more\_anterior to\_first\_molar\_or\_more\_posterior,  
 166 Infraorbital\_canal\_length / 'long\_(more\_than\_one\_molar\_length)'  
 'short\_(subequal\_or\_less\_than\_one\_molar\_length)',  
 167 Flaring\_of\_cheeks\_behind\_infraorbital\_foramen / present absent,  
 168 Nasal / widest\_posteriorly 'sides\_sub-parallel'  
 widest\_anteriorly,  
 169 Nasal\_overhangs\_external\_nasal\_aperture / present absent,  
 170 'Naso-frontal suture with medial process of frontals wedged  
 between nasals' / present absent,  
 171 Nasofrontal\_suture\_position /  
 posterior\_to\_or\_even\_with\_anterior\_orbital\_rim anterior\_to\_orbital\_rim,  
 172 Nasal\_foramina / present absent,  
 173 'Fronto-maxillary contact on rostrum' / absent present,  
 174 Maxillary\_process\_of\_frontal / vestigial\_or\_absent  
 elongate\_and\_thin,  
 175 Preorbital\_length\_relative\_to\_postorbital\_length /  
 'less\_than\_one-third' 'more\_than\_one-third',  
 176 Lacrimal / present absent,  
 177 Facial\_process\_of\_lacrimal /  
 'large,\_triangular\_and\_pointed\_anteriorly'  
 'small,\_rectangular\_or\_crescentic',  
 178 Lacrimal\_tubercle / present absent,  
 179 Lacrimal\_foramen\_exposed\_on\_face / present absent,  
 180 Lacrimal\_foramen\_number / two one,  
 181 Lacrimal\_foramen\_within\_lacrimal / yes  
 'no,\_with\_maxillary\_contribution' 'no,\_with\_jugal\_contribution',  
 182 Translacrimal\_canal / absent present,  
 183 'Premaxilla, palatal process' / does\_not  
 does\_reach\_nearly\_to\_canine\_alveolus,  
 184 'Premaxillary-maxillary suture on palate' / transverse  
 'wedge-shaped,\_pointing\_anteriorly' 'wedge-  
 shaped,\_pointing\_posteriorly',  
 185 Incisive\_foramen / 'small,\_length\_of\_1\_or\_2\_incisors'  
 'intermediate,\_length\_of\_3\_or\_4\_incisors'  
 'elongate,\_more\_than\_half\_the\_palate\_length',  
 186 Incisive\_foramen\_composition / between\_maxilla\_and\_premaxilla

within\_premaxilla,  
 187 Palatal\_vacuities / absent present,  
 188 Major\_palatine\_foramen / within\_palatine\_  
 between\_palatine\_and\_maxilla\_ within\_maxilla multiple\_small\_foramina  
 absent,  
 189 Anterior\_extent\_of\_palatine\_on\_palate / first\_molar\_  
 more\_posterior\_ more\_anterior,  
 190 Palatal\_expansion\_to\_last\_molar / even posterior anterior,  
 191 Postpalatine\_torus / absent\_ present\_,  
 192 Posterior\_nasal\_spine / weak\_or\_absent prominent,  
 193 Minor\_palatine\_foramen / small\_  
 'large,\_with\_thin,\_posterior\_bony\_bridge\_' multiple\_small\_foramina  
 absent,  
 194 Minor\_palatine\_foramen\_composition /  
 'palatine\_(or\_palatine-maxilla)' palatine\_and\_pterygoid,  
 195 Maxilla\_expanded\_posterior\_to\_last\_molar / absent present,  
 196 Posterior\_edge\_of\_anterior\_zygomatic\_root /  
 aligned\_with\_last\_molar\_ with\_anterior\_molars\_ with\_premolars  
 posterior\_to\_last\_molar,  
 197 Zygomatic\_process\_of\_maxilla / present\_ vestigial\_,  
 198 Jugal / present absent,  
 199 Jugal / contributes\_to\_anteroventral\_orbit\_and\_zygoma  
 contributes\_to\_zygoma,  
 200 'Maxillary-jugal contact bifurcated' / absent present,  
 201 'Jugal-lacrimal contact' / present absent,  
 202 Zygomatic\_arch / stout delicate incomplete,  
 203 Molar\_roots\_exposed\_in\_orbit\_floor / absent present,  
 204 Palatine\_reaches\_infraorbital\_canal / present absent,  
 205 Lacrimal\_contributes\_to\_maxillary\_foramen / present absent,  
 206 Groove\_connects\_maxillary\_and\_sphenopalatine\_foramina / absent  
 present,  
 207 Sphenopalatine\_foramen / within\_palatine  
 between\_palatine\_and\_maxilla 'between\_palatine,\_maxilla,\_and\_frontal'  
 within\_maxilla,  
 208 Sphenopalatine\_foramen\_proximal\_to\_maxillary\_foramen / absent  
 present,  
 209 Maxilla\_excluded\_from\_medial\_orbital\_wall / present absent,  
 210 Frontal\_and\_maxilla\_contact\_in\_medial\_orbital\_wall / absent  
 present,  
 211 Orbital\_process\_of\_palatine / present  
 'absent\_(palatine\_excluded\_from\_medial\_wall)\_or\_thin\_sliver\_in\_ventrome  
 dial\_wall',  
 212 Ethmoid\_exposure\_in\_orbit / absent present,  
 213 Ethmoid\_foramen / between\_frontal\_and\_orbitosphenoid  
 within\_frontal,  
 214 Foramen\_for\_frontal\_diploic\_vein / absent present,  
 215 'Frontal\_foramen (on skull roof)' / absent present,  
 216 Postorbital\_process / 'present,\_prominent' 'present,\_weak'  
 absent,  
 217 Postorbital\_process\_composition / frontal parietal,  
 218 Postorbital\_bar / absent present,  
 219 Dorsal\_process\_of\_jugal / weak\_or\_absent strong,  
 220 Optic\_foramen / absent present,  
 221 Optic\_foramen\_position /  
 narrowly\_separated\_from\_sphenorbital\_fissure  
 broadly\_separated\_from\_sphenorbital\_fissure  
 not\_visible\_in\_lateral\_view,



222 Orbitosphenoid / expanded\_anteriorly expanded\_dorsally  
 confined\_to\_optic\_foramen\_and\_vicinity,  
 223 Suboptic\_foramen / absent present,  
 224 Orbitotemporal\_canal / present absent,  
 225 'Frontal/alisphenoid contact' /  
 alisphenoid\_contacting\_frontal\_at\_anterior\_corner  
 'with\_more\_extensive\_contact\_(50%\_of\_dorsal\_border)' absent,  
 226 Frontal\_length\_on\_midline\_skull\_roof /  
 subequal\_to\_slightly\_smaller\_than\_parietal less\_than\_half\_parietal  
 more\_than\_.5\_longer\_than\_parietal,  
 227 Frontoparietal\_suture / transverse  
 with\_anterior\_process\_of\_parietal\_off\_the\_midline  
 with\_anterior\_process\_of\_parietal\_on\_the\_midline,  
 228 Temporal\_lines\_meet\_to\_form\_sagittal\_crest / present absent,  
 229 Interparietal / absent present,  
 230 Nuchal\_crest / level\_with\_or\_anterior\_to\_foramen\_magnum  
 extends\_posteriorly,  
 231 Anterior\_lamina\_on\_side\_wall / present absent,  
 232 Squama\_of\_squamosal / absent\_present\_,  
 233 Foramina\_for\_temporal\_rami / on\_petrosal\_  
 on\_parietal\_and\_or\_squamosal\_ absent,  
 234 Choanae / as\_wide\_as\_posterior\_palate narrower,  
 235 Vomer\_contacts\_pterygoid / present absent,  
 236 Pterygoids\_contact\_on\_midline\_in\_roof\_of\_basipharyngeal\_canal /  
 present\_ absent\_,  
 237 Pterygopalatine\_crests / present\_ absent\_,  
 238 Midline\_crest\_in\_basipharyngeal\_canal / absent\_ present\_,  
 239 Entopterygoid\_process / absent\_ends\_at\_anterior\_basisphenoid  
 approaches\_ear\_region,  
 240 Midline\_cordiform\_eminence\_on\_basisphenoid / absent\_ present\_,  
 241 Ectopterygoid\_process\_of\_alisphenoid / absent\_  
 ends\_at\_anterior\_basisphenoid approaches\_ear\_region,  
 242 Ectopterygoid\_process / Long\_crest small\_process,  
 243 Transverse\_canal\_foramen / absent\_ present\_,  
 244 Exit\_for\_maxillary\_nerve\_to\_alisphenoid / behind\_ within\_  
 in\_front,  
 245 Number\_of\_mandibular\_nerve\_exits / two\_or\_more one\_,  
 246 Foramen\_ovale\_composition / in\_petrosal  
 between\_petrosal\_and\_alisphenoid in\_alisphenoid  
 between\_alisphenoid\_and\_squamosal,  
 247 Foramen\_ovale\_position / on\_lateral\_wall\_of\_braincase  
 on\_ventral\_surface\_of\_skull,  
 248 Alisphenoid\_canal / absent present,  
 249 Posterior\_opening\_of\_alisphenoid\_canal /  
 separated\_from\_foramen\_ovale in\_common\_depression\_with\_foramen\_ovale,  
 250 Position\_of\_jaw\_articulation\_to\_fenestra\_vestibuli /  
 at\_same\_level in\_front,  
 251 Glenoid\_fossa / on\_zygoma partially\_on\_braincase,  
 252 Glenoid\_fossa\_shape / 'concave,\_open\_anteriorly' 'trough-like'  
 'anteroposteriorly\_elongate,\_concave' anteroposteriorly\_short  
 'convex,\_open\_anteriorly',  
 253 Glenoid\_fossa\_vertical\_position / even\_with\_central\_stem  
 significantly\_higher,  
 254 Glenoid\_process\_of\_jugal / 'present,\_with\_articular\_facet'  
 'present,\_without\_facet' absent,  
 255 Glenoid\_process\_of\_alisphenoid / absent present,  
 256 Postglenoid\_process / absent present,

257 Postglenoid\_foramen / absent\_or\_vestigial present,  
 258 Postglenoid\_foramen\_position /  
 'present,\_behind\_postglenoid\_process'  
 'present,\_medial\_to\_postglenoid\_process,\_within\_glenoid\_fossa'  
 on\_lateral\_aspect\_of\_braincase,  
 259 Postglenoid\_foramen\_composition / within\_squamosal  
 behind\_squamosal,  
 260 Suprameatal\_foramen / absent present,  
 261 Entoglenoid\_process\_of\_squamosal / absent  
 'present,\_separate\_from\_postglenoid\_process'  
 'present,\_continuous\_with\_postglenoid\_process',  
 262 Posttympanic\_crest\_of\_squamosal / absent present,  
 263 Carotid\_foramen / within\_basisphenoid\_  
 between\_basisphenoid\_and\_petrosal\_ absent,  
 264 Cavum\_epiptericum / floored\_by\_petrosal\_  
 petrosal\_and\_alisphenoid\_ primarily\_or\_exclusively\_squamosal  
 open\_as\_piriform\_fenestra,  
 265 Alisphenoid\_tympanic\_process / absent\_ 'present,\_low',  
 266 Basisphenoid\_tympanic\_process / vestigial\_or\_absent  
 'present,\_contributing\_to anteromedial\_bulla',  
 267 Basicochlear\_fissure / closed patent,  
 268 Epitympanic\_wing\_medial\_to\_promontorium / absent\_ flat\_  
 thickened,  
 269 RTPP / vestigial\_or\_absent  
 'low\_ridge,\_contributing\_to posteromedial\_bulla'  
 'tall\_ridge,\_contributing\_to ventral\_bulla',  
 270 Course\_of\_internal\_carotid\_artery /  
 'lateral\_(transpromontorial)' 'medial\_(perbullar\_or\_extrabullar)'  
 artery\_absent,  
 271 'Intratympanic vascular canal for internal carotid (in lateral  
 position)' / absent present,  
 272 Deep\_groove\_for\_internal\_carotid\_on\_anterior\_pole / absent\_  
 present\_,  
 273 'Perbullar carotid canal (for medial course)' / absent present,  
 274 Stapedial\_artery / sulcus canal\_ absent,  
 275 Stapedial\_ratio / 'rounded,\_less\_than\_1.8\_'  
 'elliptical,\_more\_than\_1.8\_',  
 276 Coiling\_of\_cochlea / less\_than\_360\_ 360\_or\_greater\_,  
 277 Pars\_cochlearis\_length / greater\_than\_13%\_skull\_length  
 less\_than\_10%\_skull\_length,  
 278 Promontorium\_shape / flat globose,  
 279 Promontorium\_depth / even\_with\_or\_lower\_than\_basioccipital  
 higher\_than\_basioccipital,  
 280 Facial\_nerve\_intratympanic\_course / open\_in\_sulcus  
 'open\_anteriorly,\_in\_canal\_posteriorly' in\_canal,  
 281 Tympanic\_aperture\_of\_hiatus\_Fallopia /  
 in\_roof\_through\_petrosal\_  
 at\_anterior\_edge\_of\_petrosal\_ absent semilunar\_hiatus,  
 282 Prootic\_canal / present absent,  
 283 Prootic\_canal / long\_and\_vertical\_ short\_and\_vertical\_  
 short\_and\_horizontal,  
 284 Lateral\_flange / parallels\_length\_of\_promontorium\_  
 greatly\_reduced\_or\_absent,  
 285 Bony\_shelf\_lateral\_to\_promontorium / extended\_anteriorly  
 confined\_posterolaterally prolonged\_anterior\_to\_promontorium,  
 286 Tegmen\_tympani\_width / uniform expanded\_anteriorly,  
 287 tegmen\_tympani\_inflation / absent present,

288 Stapedial\_canal\_on\_tegmen\_tympani / absent present,  
 289 Tensor\_tympani\_fossa / shallow\_or\_vestigial circular\_pit,  
 290 Medial\_process\_of\_squamosal\_in\_tympanic\_cavity / absent\_  
 present\_,  
 291 Hypotympanic\_sinus / absent\_  
 'formed\_by\_squamosal,\_petrosal,\_and\_alisphenoid\_'  
 formed\_by\_alisphenoid\_and\_petrosal formed\_by\_petrosal,  
 292 'Epitympanic\_recess/fossa\_incudis\_size' / subequal  
 epitympanic\_recess\_larger no\_visible\_depression\_for\_epitympanic\_recess,  
 293 Epitympanic\_recess /  
 with\_small\_contribution\_to\_posterolateral\_wall\_by\_squamosal\_  
 with\_extensive\_contribution\_to\_lateral\_wall\_by\_squamosal\_  
 with\_no\_squamosal\_contribution,  
 294 Fossa\_incudis / continuous\_with\_  
 separated\_from\_epitympanic\_recess\_,  
 295 Fossa\_incudis / open\_ventrally floored\_by\_squamosal  
 floored\_by\_ectotympanic,  
 296 Fossa\_incudis\_position\_relative\_to\_fenestra\_vestibuli / lateral  
 anterior,  
 297 Foramen\_for\_ramus\_superior / on\_petrosal\_  
 'on\_petrosal-squamosal\_suture\_' absent,  
 298 Foramen\_for\_ramus\_superior\_to\_f.\_vestibuli /  
 posterior\_or\_lateral\_ anterior\_,  
 299 Ascending\_canal / intramural\_ intracranial\_ absent,  
 300 Stapedius\_fossa / twice\_size\_of\_fenestra\_vestibuli\_  
 small\_and\_shallow\_,  
 301 Cochlear\_canaliculus\_visible\_canal\_in\_middle\_ear / absent  
 present,  
 302 Cochlear\_fossula / vestigial\_or\_absent  
 distinct\_pit\_behind\_fenestra\_cochleae,  
 303 Fenestra\_cochleae / posteromedial\_to\_fenestra\_vestibuli  
 posterior\_to\_fenestra\_vestibuli,  
 304 Posterior\_septum\_shields\_fenestra\_cochleae / absent present,  
 305 Paroccipital\_process\_orientation / vertical\_  
 'slanted,\_towards\_back\_of\_promontorium\_' indistinct\_to\_absent,  
 306 CTPP\_notched / absent present,  
 307 Crista\_interfenestralis\_and\_CTPP\_connected\_by\_curved\_ridge /  
 absent\_ present\_,  
 308 '"Tympanic\_process"' / absent\_ 'present,\_low'  
 inflated\_into\_bulla\_wall,  
 309 '"Tympanic\_process" composition' / petrosal  
 petrosal\_and\_exoccipital,  
 310 Rear\_margin\_of\_auditory\_region / marked\_by\_steep\_wall\_  
 extended\_onto\_flat\_surface\_,  
 311 Inferior\_petrosal\_sinus / intrapetrosal\_  
 'between\_petrosal,\_basisphenoid,\_and\_basioccipital\_' endocranial,  
 312 Jugular\_foramen\_size\_to\_f.\_cochleae / subequal\_ larger\_,  
 313 Jugular\_foramen / confluent\_with\_  
 separated\_from\_opening\_for\_inferior\_petrosal\_sinus\_,  
 314 Hypoglossal\_foramen / two\_or\_more\_ one\_ absent,  
 315 Hypoglossal\_foramen\_size / smaller\_than\_jugular\_foramen  
 housed\_in\_large\_opening subequal\_to\_larger\_than\_jugular\_foramen,  
 316 Paracondylar\_process / weak\_or\_absent\_ 'prominent,\_vertical'  
 'prominent,\_posteriorly\_directed',  
 317 Ectotympanic / phaneric aphaneric,  
 318 Ectotympanic\_shape / 'ring-like\_' fusiform\_  
 'expanded,\_contributing\_to\_bullar\_floor',

319 Ant\_crus\_ectotympanic\_broadly\_contacts\_squamosal / absent\_ present\_,  
 320 Elongate\_ossified\_external\_acoustic\_meatus / absent present,  
 321 Roof\_of\_external\_acoustic\_meatus / petrosal squamosal,  
 322 Entotympanic / absent\_ present\_,  
 323 Hyoid\_pit / absent present,  
 324 Hyoid\_contributes\_to\_bullar\_floor / absent present,  
 325 Dorsum\_sellae / tall\_ low\_,  
 326 Post\_clinoid\_process\_contacts\_promontorium / absent\_ present\_,  
 327 Position\_of\_ant\_distrib\_of\_transverse\_sinus\_to\_subarcuate\_fossa / anterolateral\_ posterolateral\_ absent,  
 328 Wall\_separating\_cavum\_supracochleare\_and\_eptericum / absent\_ incomplete complete,  
 329 Crista\_petrosa / vestigial\_or\_absent 'tall,\_thin\_crest',  
 330 Subarcuate\_fossa\_aperture / not\_constricted constricted absent,  
 331 Anterior\_semicircular\_canal / does\_ does\_not\_form\_lateral\_wall\_of\_subarcuate\_fossa,  
 332 Internal\_acoustic\_meatus / 'deep,\_with\_thick\_prefacial\_commissure\_' 'shallow,\_with\_thin\_prefacial\_commissure\_',  
 333 Posttemporal\_canal / large small absent,  
 334 Posttemporal\_canal\_composition / posterior\_opening\_between\_petrosal\_and\_squamosal within\_petrosal,  
 335 Posttemporal\_canal\_position / on\_occiput dorsal\_to\_external\_acoustic\_meatus,  
 336 Mastoid\_foramen / absent\_ two\_in\_mastoid\_ one\_in\_mastoid between\_mastoid\_and\_supraoccipital,  
 337 Amastoidy / absent present,  
 338 Dorsal\_margin\_of\_foramen\_magnum / formed\_by\_exoccipitals\_ by\_exoccipitals\_and\_supraoccipital\_,  
 339 Atlantal\_foramen / present\_ absent\_,  
 340 Atlas\_neural\_arch\_fused / absent\_ present\_,  
 341 Atlas\_neural\_arch\_and\_intercentrum\_fused / absent\_ present\_,  
 342 Axis / with\_suture\_between\_atlantal\_and\_axial\_parts without\_suture,  
 343 Axis\_with\_extra\_pair\_of\_transverse\_processes\_on\_ventral\_surface / present\_ absent\_,  
 344 Axis\_anterior\_facets\_and\_dens\_connection / not\_linked\_ linked\_ facets\_extend\_ventral\_to\_dens,  
 345 Cervical\_inferior\_lamellae / present absent,  
 346 'C7 (or last) transverse foramen' / present\_ absent\_,  
 347 Thoracic\_vertebrae / 13\_or\_fewer 15\_or\_more,  
 348 Number\_of\_lumbar / six\_or\_more five\_or\_fewer,  
 349 'Xenarthrous articulation in addition to the pre- and post-zygapophyses of lumbar vertebrae' / absent present,  
 350 Sacral\_vertebrae / two three four\_or\_more,  
 351 Sacral\_vertebra\_fused\_to\_pelvis / absent present,  
 352 Infraspinous\_fossa\_position\_and\_size\_to\_supraspinous / different\_planes\_and\_larger\_ coplanar\_and\_subequal\_,  
 353 Suprascapular\_incisure / absent\_ present\_,  
 354 Acromion / reaches\_distal\_to\_glenoid\_articulation\_with\_humerus remains\_proximal absent,  
 355 Metacromion / weak\_or\_absent distinct\_process,  
 356 Greater\_tubercle\_of\_humerus / ventral\_to\_humeral\_head even\_or\_dorsal\_to\_humeral\_head,  
 357 Deltpectoral\_crest / proximal\_half\_of\_humerus\_ distal\_half\_of\_humerus\_,

358 Supinator\_ridge / weak\_or\_absent\_ 'shelf-like',  
 359 Medial\_epicondyle / robust weak,  
 360 Entepicondylar\_foramen / present absent,  
 361 Supratrochlear\_foramen / absent\_ present\_,  
 362 Ulnar\_articulation\_on\_humerus / spherical\_ cylindrical\_,  
 363 Radial\_articulation\_on\_humerus /  
 rounded\_radial\_condyle\_anteriorly\_but\_cylindrical\_posteriorly  
 capitulum,  
 364 Radius\_articulation\_with\_distal\_humerus / single\_fossa  
 two\_fossae,  
 365 Central\_process\_of\_radial\_head / small\_or\_absent present,  
 366 Radius\_and\_ulna\_distal\_fusion / absent present,  
 367 Radius\_articulation\_with\_carpals / single\_fossa two\_fossae,  
 368 Scaphoid\_and\_lunate / separate fused,  
 369 Centrale / present absent,  
 370 Pubic\_symphysis / extensive narrow,  
 371 Epipubic\_bone / present\_ absent\_,  
 372 Articular\_surface\_of\_femoral\_head / extended\_posterolaterally  
 limited\_to\_sphere\_of\_femoral\_head,  
 373 Fovea\_for\_ligamentum\_teres /  
 does\_not\_interrupt\_margin\_of\_articular\_surface does absent,  
 374 Greater\_trochanter\_to\_femoral\_head / lower higher,  
 375 Size\_of\_lesser\_trochanter\_of\_femur / large\_ small\_,  
 376 Third\_trochanter / absent present,  
 377 Pectineal\_tubercle / absent\_or\_vestigial distinct,  
 378 Distal\_femur /  
 similarly\_sized\_in\_anteroposterior\_and\_mediolateral\_dimensions  
 longer\_anteroposteriorly\_than\_mediolaterally,  
 379 Patellar\_facet\_of\_femur / 'shallow,\_weakly\_developed\_'  
 broad\_and\_shallow narrow\_and\_elevated,  
 380 Ossified\_patella / absent\_ present\_,  
 381 Articulation\_betw\_femur\_and\_fibula / absent\_ present\_,  
 382 Tibia\_and\_fibula\_proximal\_fusion / absent present,  
 383 Tibia\_and\_fibula\_distal\_fusion / absent present,  
 384 Depth\_of\_trochlear\_groove / absent\_or\_shallow  
 'moderately\_deep\_(U-shaped)' 'deep\_(V-shaped)',  
 385 'Astragalus, angle bet med and lat tib facets' / 180\_  
 intermediate\_ 90 lateral\_tibial\_facet\_absent,  
 386 'Astragalus, angle betw fib facet and lat tib facet' / 180  
 intermediate\_ 90,  
 387 Radius\_of\_curvature\_of\_lateral\_trochlear\_ridge /  
 greater\_than\_medial subequal,  
 388 Cotylar\_fossa / absent present,  
 389 Sustentacular\_and\_navicular\_facets\_of\_astragalus\_contact /  
 absent present,  
 390 Astragalar\_sustentacular\_facet\_medial\_extent / does\_not\_  
 does\_reach\_medial\_edge\_of\_neck\_,  
 391 'Astragalar medial plantar tubercle (ampt)' /  
 vestigial\_or\_absent protruding,  
 392 Astragalar\_neck / absent\_ present\_ present\_long,  
 393 Astragalar\_head\_convexity / absent present,  
 394 Facet\_on\_astragalus\_for\_cuboid / absent present,  
 395 Astragalar\_canal / present dorsal\_foramen\_only absent,  
 396 Posterior\_trochlear\_shelf\_of\_astragalus / reduced strong,  
 397 Calcaneal\_width /  
 'broad,\_with\_sustentacular\_and\_ectal\_facets\_extending\_away\_from\_body'

```
'narrow,_with_sustentacular_and_ectal_facets_in_line_with_long_axis_of_
body',
  398 'Ectal (post calcaneostragalar facet) longest dimension' /
anteromedial_to_posterolateral_ straight_
posteromedial_to anterolateral,
  399 Overlap_between_ectal_and_sustentacular_facets /
partial_overlap
complete_overlap absent,
  400 Calcaneal_sustentacular_facet_mesiolateral_orientation /
medial_
dorsal_,
  401 Calcaneal_sustentacular_facet_expanded_onto_body / absent
present,
  402 Calcaneal_anterior_peroneal_tubercle_position /
protruding_anteriorly_beyond_calcaneocuboid_facet_
'anterior,_non-protruding_'
at_a_distance_from_anterior_end_of_calcaneum
absent,
  403 Calcaneal_plantar_tubercle / absent_ at_distal_margin
more_proximal,
  404 Tuber_calcis_ventral_curvature / present_ absent_,
  405 Calcaneal_facet_for_fibula / present absent,
  406
Orientation_of_ML_axis_of_cuboid_facet_relative_to_long_axis_of_calcane
um
/ less_than_70_degrees 70_to_80_degrees approximately_90_degrees,
  407 Proportions_of_cuboid_facet / depth_and_width_subequal
deeper_than_wide wider_than_deep,
  408 Deep_groove_for_tendon_of_flexor_fibularis / absent present
;
```

MATRIX

```
[
      10      20      30      40      50
    60      70      80      90     100     110     120
  130     140     150     160     170     180     190
  200     210     220     230     240     250     260
  270     280     290     300     310     320     330
  340     350     360     370     380     390     400
]
[
      .      .      .      .      .
    .      .      .      .      .
  .      .      .      .      .
.      .      .      .      .
]

```

Nanolestes

```
000?0??0?????0?1?0?000000??00000?00000001000?000000000000100?0000?0102
0110{01}00000000--000--0-----0?0??000000001000010?0---
0?0020?0001????0020000?1?02000?00????????????????????????????????????
????????????????????????????????????????????????????????????????????
????????????????????????????????????????????????????????????????????
????????????????????????????????????????????????????????????????????
Peramus
```

```
000{03}0??{012}?????????0?000101??0?100000000001000000000001100011000
00000200000101000000--000--0-----0?0?00000000100000100---
```



Prokennalestes

000?00?0?????????0?0??00?0?1????10001(01)100000000(01)00(01)000(01)
0100(12)1001100010200100000011111012000000--
001000000010011002111100000011010111201100200010?100001010????011?1????
?????????????????????????????0?0????????????????????????????????????11(01)?????
????????????????????????????????????10000?00111?0001110000??11000010000000?00-
000?????????1?00??02???11?0????????????????????????????????????????????????
????????????????????????????????????

Murtoilestes

00????????????????????????????????????????????????????????????????-
?????????????0111?2100010211100000011112012000000--
0?1??000101?01110211110000????????????????????????????????????????????????
????????????????????????????????????????????????????????????????????????????
????????????????????????????????????????????????????????????????????????????
????????????????????????????????????????????????????????????????????????????
????????????????????????????????????????????????????????????????????????????
????????????????????????????????????

Bobolestes

000?00?0??????0??0?0??0?11??0?1????????????????????00000000120000100110?2001
0022{01}1100100111122112010100--
00100000001001110211110000002(12)01??01?01????????????01000021????????????
????????????????????????????????????????????????????????????????????????????
????????????????????????????????????????????????????????????????????????????
????????????????????????????????????????????????????????????????????????????
????????????????????????????????????????????????????????????????????????????
????????????????????????????????????

Montanalestes

00{01}????{012}????????????????????????{01}?1????????????????????1001100011
10????????????????????????????????????????01000100111021111000000{12}
3010021201100201010110{02}01-
021????????????????????????????????????????????????????????????????????????
????????????????????????????????????????????????????????????????????????????
????????????????????????????????????????????????????????????????????????????
????????????????????????????????????????????????????????????????????????????
????????????????????????????????????

Paranyctoides

000?0?????????????????0?????11??0?1?????1{01}001(12)2000?0001010000(01)00110
0111011010(02)22{01}111110011111211211111000?1??0000010011312211200010
0(13)201??11?0?????????????????????1?1????????????????????????????????????
????????????????????????????????????????????????????????????????????????????
????????????????????????????????????????????????????????????????????????????
????????????????????????????????????????????????????????????????????????????
????????????????????????????????????

Eozhelestes

000????0?????????????0?????11??0????????????????????000(01)?1?????????1?0?????
????????????????????????????????????????????????????????000001001110223020001?0?2????????
?????????????0(01)0????????????????????????????????????????????????????????
????????????????????????????????????????????????????????????????????????????
????????????????????????????????????????????????????????????????????????????
????????????????????????????????????

Sheikhdzheilia

00????????????????????????????????????????????????????????{12}?????????????1010?110012101
02000210111110211021122122010200-
00?1??000?010011{12}1223?20000?{01}?20????????????????????????????????????
????????????????????????????????????????????????????????????????????????????
????????????????????????????????????????????????????????????????????????????
????????????????????????????????????????????????????????????????????????????
????????????????????????????????????

Alosteria

00????????????????????????????????????????????????????????????????0121?2021
002222111102111122122110222000?1??0?0?01?01131223?20000????????????????





121????11(01)?10??0????01?110??????2010??01????????????????????10-  
????????????????????????????????????????????????????????????????????  
????????????????????????????????????????????????????????????????????  
????????????????????????????????????????????????????????????????????

Maelestes

000{03}00?1?????0?100?1?0{01}010?0?10101100110211000111100000001010022  
212021002100101100101100-  
1201011100001000000021111102121210000023010021201100200001020001-  
1???11001100???0???10??1000????1102101100100001110110000001?{01}000????  
0?11???1111?0112120???{23}???1100?011001010300010000-  
01111002021100000001001{12}?{12}00100011111{12}00(01)100?0?00??10021111  
110{03}01100010??????000?1000011100????????????????????01100???11??0????  
????????

Batodon

001????????????????0?????01??1?1????100?112000?010--  
000110001100221?102100212110110011112211201011100001000000010111{12}021  
21{12}00000022?1????????????????????0001-  
????????????????????????????????????????????????????????????????????  
????????????????????????????????????????????????????????????????????  
????????????????????????????????????????????????????????????????????  
????????????????????????????????????????????????????????????????????

Bulaklestes

001????????????????0?0???00??1?1????1000????????000--  
000100001100112111210022{02}{01}101100111112112001100--  
001?0000?010011102112100000002?1?????1????????????0001-  
?21????????????????????????????????????????????????????????????????  
????????????????????????????????????????????????????????????????????  
????????????????????????????????????????????????????????????????????  
????????????????????????????????????????????????????????????????????

Daulestes

001????????????????0?????00??1?1???-10001120000000--  
000101011100111(01)10000022001011001111121120001(01)(01)000?1??000?0200  
1110211?10000?0?2?????????1?????????????????1-  
?????????1????????????????????????????????????????????????????????  
????????????????????????????????????????????????????????????????????  
????????????????????????????????????????????????????????????????????  
????????????????????????????????????????????????????????????????????

Uchkudukodon

001{03}00?{01}??????{01}?????000?0000101???-10001020000??0--  
000?0101?100110111000022001011001111121120001(01)(01)000?10000000200111  
0211210000001(23)010111201100200010010201-121??0?011000?1110-  
100111000???0{01}0210110?1000011001{013}?00000?02--  
010?00210???1111???1?00-021{23}00-1?00?0111012?1?0001000000011100?1-  
1?0000?????1?????00????????????00?0?000????????????0?100????????????  
????????????????????????????????????????????????????????????????????

Kennalestes

001000{012}1?00001000?0?00000000101000-10011121100001--  
00000101010021202120002200101100111112112001112000010000000101111021111  
0000001201002120010020000??10001-1211100011010?0?10-  
101111000???0000101100?0000110?10000000??2--  
?10100???0001111?01?2?20?11300-1000?01110121?3000101-000111100?1-  
10000000?1?11??{01}00100211101100110?1?00000?00211112--  
20?110????????????????????????????????????????????????????????????  
??

Asioryctes

00100000000001000?000000000?1?1000-20011220000001--  
1001010101002100102100220010110011111(02)112001100--

001000000020111102111100000001010021200100200010010001-  
1211100011010?0010-1001110000000?010110000010110?10000000??2--  
010100{02}100001111?0111020011300-1000101110121?3000101-00011110001-  
10000000?1111??{01}0010021110110011001?00000?0??????2--  
10111001101????????????????????000????????????????0011?0?11111?00??1000000  
?0

Ukhaatherium

001000000000010000000001010?1?1001-20011220000001--  
10010101010021001021002200101100111110112001100--  
001000000020?11102111100000002010021200100200010010001-  
?21110001101000010-1011110000000?01011000001011?01?0??00??02--  
01010??1?0001111?01110200?1?00-100010111012103000101-000111100?1-  
10000000?1?11{01}1{01}001002111?11000100110?0001002???12--  
2011????????????100010000011?00?0?00??01?00?11?0011001112100001010200?2  
20

Deccanolestes

00????????????????0?????01??1?1????1011????????001--  
000?2100???0211010210022{01}2111100111122012011200-  
0001?0001?010011112(12)1110000?012????????????????????000????????????????  
????????????????????????????????????????????????????????????????????????  
????????????????????????????????????????????????????????????????????????  
????????????????????????????????????????????????????????????????????????  
????0120011111000020100111100

Kulbeckia

001100{012}0?????21?1?11100000??1?1000-2?111020000000--  
?001211?110022002021002221111102111112122001200--  
001?00000022111(12)122211000000(12)101???1210????????????0001-  
12111000110000?0?0-?00????101???{012}?????0010000?????????????1?10-  
?????????????1?{12}?????????????????????????????????????10{12}-  
0?0(01)1?1?011-  
110000?????1?011{01}00100?111?11????????????00???2???11?0?0????????????  
????????????????????????????????????????????????????????????????????????

Zhangolestes

000?00?1??????1?1?211???111?0????????????????????00011???121??0100????????  
????????????????????????????????????????????000001?01131222??0000?{01}?101??????  
?????????????0?0????????????????????????????????????????????????????????  
????????????????????????????????????????????????????????????????????????  
????????????????????????????????????????????????????????????????????????  
????????????????????????????????????????????????????????????????????????

Alymlestes

00????????????????????????????????????????????????????????????????0????????  
????????????????????????????????????????????001002210131223???000????????????  
????????????????????????????????????????????????????????????????????????  
????????????????????????????????????????????????????????????????????????  
????????????????????????????????????????????????????????????????????????  
????????????????????????????????????????????????????????????????????????

Zalambdalestes

00(12)(01)00(23)11110?21211211000111?(12)?1000-21111120001000--  
00012100010022002021002121111102101100-22001200--  
00110001002211131223121000001101011120{01}100200001010001-  
121110001100000110-  
1000100101000200{01}011010000011101200110100000010100101(01)00111100111  
120011300-1000{12}0111012103000101-00011110011-  
100000000101111{01}00100211111{12}0000001101000?102???1100101???00?11??  
???11??100?0????0?????01???100??0??{12}2200?1?110{12}01201?30112?0

Barunlestes

002(01)00?1?????1211211011111?2?1----201111200?000---  
 0??12100010022002021002121111102101100-22001200--  
 0011000100221113122312100001-1010111200100200001010101-  
 121???0?11000????0-  
 100?110?0???0220101001?00????1?1{13}01100??0???10?0?????011?1??111120  
 01130??1000?0111012103000101-0?011110011-  
 10000000?1?11??00100211111?00000????1?0??1?????????011100?0??0?0?1??  
 ?100001110?00100012111001?0????????????????????????????????

Gypsonictops

00(01)?00?{012}?????????0?0??010?(01)?1????2(01)11222111000010(01)1(1  
 2)12110110022101021002221111001111221220112220000100000002(12)111312(1  
 2)1120000002201???1200??020000?????1-  
 121?????11????????????????????????????????????????????????????????  
 ?????????????????????????????????????????????????????????????????  
 ?????????????????????????????????????????????????????????????????  
 ?????????????????????????????????????????????????????????????????  
 ?????????????????????????????????????????????????????????????????

Leptictis

0013003110000000000000001110?101001-11112221110010--  
 00012120110022002021002221111021111221120112120000110000002(12)1113122  
 11200000012010111200100200001120?01-  
 1211100112111011110101011001000002011100000010101100000000102--  
 011000100100111111020101212010110020110011001100100000011110011-  
 10000001?10001?1001002100-111110000101100100211012--  
 301?111????000201111000001110?00010100111002?00102200010210200201011112  
 10

Purgatorius

001?00?1??300?0?1?0?0??01??1?????-????2{12}10000010--  
 00020010110022{12}02021002222{12}1110211112112112222000?1??001?0110111  
 1221110000003200????????????????????????????????????????????????????  
 ?????????????????????????????????????????????????????????????????  
 ?????????????????????????????????????????????????????????????????  
 ?????????????????????????????????????????????????????????????????  
 ?????????????????????????????????????????????????????????????????  
 ??????????

Protungulatum

001???0?????????0?0?000?01010?1?2???-10112(01)11100010--  
 1001100011102210202100222211102111211022102222000011000(01)001101111(1  
 2)1312000100(12)(12)010021200100201001020001-  
 121????????????????????????????????????????????????????????????????  
 ?????1?{12}????????????????????????????????????????00000?011?1?001-  
 10???0??211?0{12}?{12}001002101011?????????1?00??0201112--  
 ?0????????????????????????????????????????????????????????????022100?0111000211011101  
 20

Oxyprimus

001????????????????????????????????1?????-????????????????--  
 100120001110221020210022221110211121102210222200001?0000001101111(12)1  
 21200010{01}?1010021200100??00??2???1-  
 131????????????????????????????????????????????????????????????????  
 ?????????????????????????????????????????????????????????????????  
 ?????????????????????????????????????????????????????????????????  
 ?????????????????????????????????????????????????????????????????  
 ?????????????????????????????????????????????????????????????????

Vulpavus

00(12)000210000000000000001010?(12)?0111-00011230000011--  
 00000000?12022002021002222111102111100-  
 22101111(01)10011001100210111122131000010(12)(12)0?0011?00?0000001112??  
 01-  
 1??11(01)011001(12)010110001111001?0?01(02)?????01?0010{01}?0?????????  
 0000110?01?01001111??110?0???2120111000?01100?011300000000-0?11010?1-

12000102{01}1{01}0010{01}000000100-  
1{12}10102???01?00?????????????0?????????00?1?001??000110000(01)???101  
11001???00220001021010020102011100

Miacis

001000210000000000000?01010?1?0111-0000123000101?--  
00010000012022002021002221011102111100-  
221001(02)(01)01001100110010011111023100001{01}?10100?10000?0????1111??  
?1-  
1{123}1?????10012?10?10?????????????????20???0?????????10?1000000110000?10?  
010010?111111?101011?21(23)0111000?011000111(13)0000000-0111010?1-  
1200011111000???00000010101{12}10002???01?00?????????????0?????????????0010  
?????10?000????0?00???????1?????000?????????1?1?0?????????1???

Gujratia

00100021?0000?0400000001110?1?2001-20012001100011--  
000201001111120020210022221111021111221221022230000100000?0210111222212  
0001002(12)010011000000300001{01}2000?????1110111010?0011010101100?????  
??1103-03000000??002001001110000100000000011111??1?1010021200-  
1000101100???1300000000-???1?1??1-  
??0?01?????????????????02?????1?11{01}0102?01000?????????2--  
30???????1??010?????10011??11?010101?111?12100012210010201201101012101  
10

Hyopsodus

0013002101000000000000011110?102110-10012001100010--  
0(01)1221100111120020210022221111021120220221012232(01)00110(01)0000210  
111222221000100(012)2010111010000{02}01001110?01-  
1211110111000011110001011?012000{012}00103-0000000000??00?000??02--  
011?0?111001111011101010021201-10002011000101100100000-0?1101011-  
100101002{01}?002-  
?00100200101{12}101?10???1?00?00201?11????0???111?0?1?020010111000111110  
10101100?100210000121001021120020101110100

Meniscotherium

0011002100400004000000011110?102001-20012201110011--  
00022110011212002011102222111112122020122101223210011000000110111222031  
-0000002110121000000001001120011-  
121111011(12)0100(01)011000101100121?0{01}02000000?0000001?0001000??000  
001100?2100011110??101010?{12}12011100?2011000101300100000-011101011-  
10010000110002-  
??0?00210101{12}0?111?????1?00?0???1??1???0?0111101110020111110010111110  
101011111100210000120000021000020101111120

Phenacodus

001000211040000400000001110?1?2010-210?2201110?11--  
0(012)0221(12)001(01)11200201110222221111212202202210222321001100010021  
0111222211000100020100(12)1000?00001001120?0?????111011(12)0000?0110001  
0110012100220?03-00000(01)0000?00000001012--  
011?0021??011110?????1010?212011100?2011000101300100{12}-002?1101011-  
10010000?1??02-?10?002100-  
12100{01}10???1?00?0?????100(03)0?01111???10020111?1001011111010101011  
110121000022?001021?00020101?112?0

Ptilocercus

0020003110000021100010101100200000-10011020100-----  
00022100110012202021002212211100110100-  
2211112201001000001011021312231200010031010011200000200001020001-  
13111200101120001110011010010000000113001000111111100100011000111010020  
1110111011101010021201010000011001101100000010-111110211-  
1210100211100{01}11100002000-120110010101100100211112--  
30101111?11{01}10101111001000110000001110001001100002210110210200101121  
11100

Plesiadapis

00(23)(01)1031013000101020-0(12)12-0?(23)-20(01)0-2(01)012(12)011(01)0-
----
0000(01)1(12)0011122(01)02021(01)02222(12)1110211012202210222320001(01)
00100021021312210200010032100021200000200011021101-
1311120112002011110100101000000000113-0100000010?0011001?02--
010?01?120001111?1112?20011200-11002011000101100002000-211110011-
121000031??{02}02-211111200201{12}1110011011000?????????2--
30?111????1??00101???000000110000???110(01)01?01???002200110110010201121
11101

Northarctus

0010003200400004000000010100102011-20002(12)01100010--
0(01)02211001112210202100222211110211012212210122320001101-----
10212222202000100121(01)00(12)1200000200001021(01)11-
13111101100011101100011011010000000013-
0000001001?000??0???0001110?0?{01}120001110?11110200?1200-
1100?011000001100002010-111110211-
12101003111?0{01}11?1111200201{12}1110010011000?????11?2--
30?11111????00010??0?00100011000010?10?001002100002210100210?11101122112
21

Adapis

0013003200400004000000(01)11100102010-(12)0002201100010--
00022110011122(01)02021002222(12)1110211012002210122320001001-----
10212222002-0010012100011000000300101021(01)11-
13111101(01)(01)0021101100011011010000010113-
00000(01)0001100011011?0001110?010120001110?1101020011210-
11001011000001100002010-111110211-
1210100311??0{01}11?1111200201{12}111001001100010??0???2--
30????????????????????????????????0???10?00???1????????2????02210100210111101122111
21

Tribosphenomys

0032114301221-121131-02-2--?3-2----0002?????????-----??0210-
010122002021002222211122-101220221022031-001111-----21313122102010001-
2100?102100?02??0???10101-131?1??-1110??????????????????-
????????????????10?????1????????????????????????????????????????????????????
????????????????????????????????????????????????????????????????????????????
????????????????????????????????????????????????????????????????????????????
????????????????????????????????????????????????????????????????000221001011020
0201011111?0

Paramys

0032114301221-121131-02-2--?(23)-2----00022201110-----0211-
0101(01)33-----1--222211-22-22-2202210222320001111-----
2131322210101000(01)32100110210000{02}??010220101-1311120-
1110200011000111110-0100002113-0200000001??3011001?02--
010100001000111011102020020201110212001200001300010000-011110001-
1010000012000011101002100-11111020?001000?0??????2--
?0?011110??00010??0?0000(01)011?10?00?112111002100002200010110200201011
11210

Rhombomylus

0032114301221-121131-02-2--?3-2----2(01)0?2(01)10200-----
011220200111233-----0--021201-22-20100-221022032-1?1111-----
110131211120000003(12)100011210000210000020101-1211120-
1110200011000111110-0100002003-
0100001011101011001000001101012120001111111202002120{01}01021200110000
2{13}000102---211110(12)11-12100103120202-2?01002000-
1210(01)0202111000000201012--
201???1??1??0?1?1?0110000111010????110111012100002210010110200211011101
20



1100001111010111001000102012101000110100110020111100001011110111000101  
0110110110000011110010?02100101200?11110201??1?00102?0

Orycteropus

01(23)---54-----2-2--?(23)?2-----0-----0-----0-10-0-  
-----

100(123)010110010000300101020201-1311001-(01)20101111010010120-  
2000401101010000001000001000001010000000011100110100-021200-  
10412010--0201100020000-011101011-1000000011100110101002100-  
111110001101000102202-12--  
(123)01?11110??000201101111001110001010101111102?110122010111100002?101  
?112??

Rhynchocyon

00210051----103100011001000102001-12011220201001--11(01)221200222033--  
---0--021211-02-10100-22101100--0-1--000011103122220-2-000-  
012011100000000300101020201-  
13111001100110111101001110012000021010010000101000001000001001001011102  
0000112101101011021200-104020010101011110?1010-111100031-  
101010011202?011?0??10?201{12}?10000111101100211112--  
20101111010001011111010111000101010011101211112211011211201221010102  
01

Procavia

00121(01)4201221-031000102-2--?1?2020-22032201200000--121221100102033--  
---1--021211-12-12300-2210112320231010000101111122032-  
0100001111120010000301101020211-1211111-1110001111000101100-  
2000(01)0(01)(01)1001(01)00000001101011000(01)0010110101200010112111101  
011021211010410010--02011001001-00211110011-10000000120002-2100002000-  
021010102111100102100112--  
011011100110020112010011111001010101111(01)12101102201111101201221030  
10220

Moeritherium

00211(01)2202000102100010112--?2?2---22012201100-----121221110111033--  
---0--022211-02-02300-2210122321001011-----11214222102001001-  
1101131010100001001020011-1??1110111?0100011001--???-  
000001(01)1100002001010?1-1?001101002--  
010?01000100111001101000011?11010400000-  
?0001?00????????????01????????????????????????0??02????????102-  
0???01?0???0?12-  
0????1?0111100?11020112011011011????????00110001?????????????????????  
??????

Chaetophractus

01130054-----0-----1111-?-----  
-----  
000000120010100300101120201-131110111-10100101010100100100103-100200-  
00000001101011001102--01020012010011111110200-121200-  
103120111112011000101-01211110121-11000001221002-2001002000-  
1101110021111001002000101000101111011112111001010001100010111011010021  
0110220000011020020101110010

Bradypus

0133--54-----112--?-----  
-----  
003100120010100000001021211-131100102--011(01)011000110100020003-  
000200-00000201100011001102--01020100010011201110200-021(23)00-  
11002010--00011000001-01201110021-11000011121002-2001002000-  
1200(01)0002101110100102-  
11010010111101011121101000001011000001111201000210000320001010020112101  
001000

Tamandua



```
1-----  
-----1-00-0-000-  
0100000111020201-13111-1-1-01101111010110(01)00-20003-10020--001002-  
0000000000102--0102010201001120?111200-021200-11002010--0100100000000-  
211110??1-1?0000???????2-2?0?002000-  
12101100210110010020101(12)0100?011110011112110000010001100010111100100  
0210000220011010020022101011000  
;  
END;
```

## Part VI. TNT Analysis

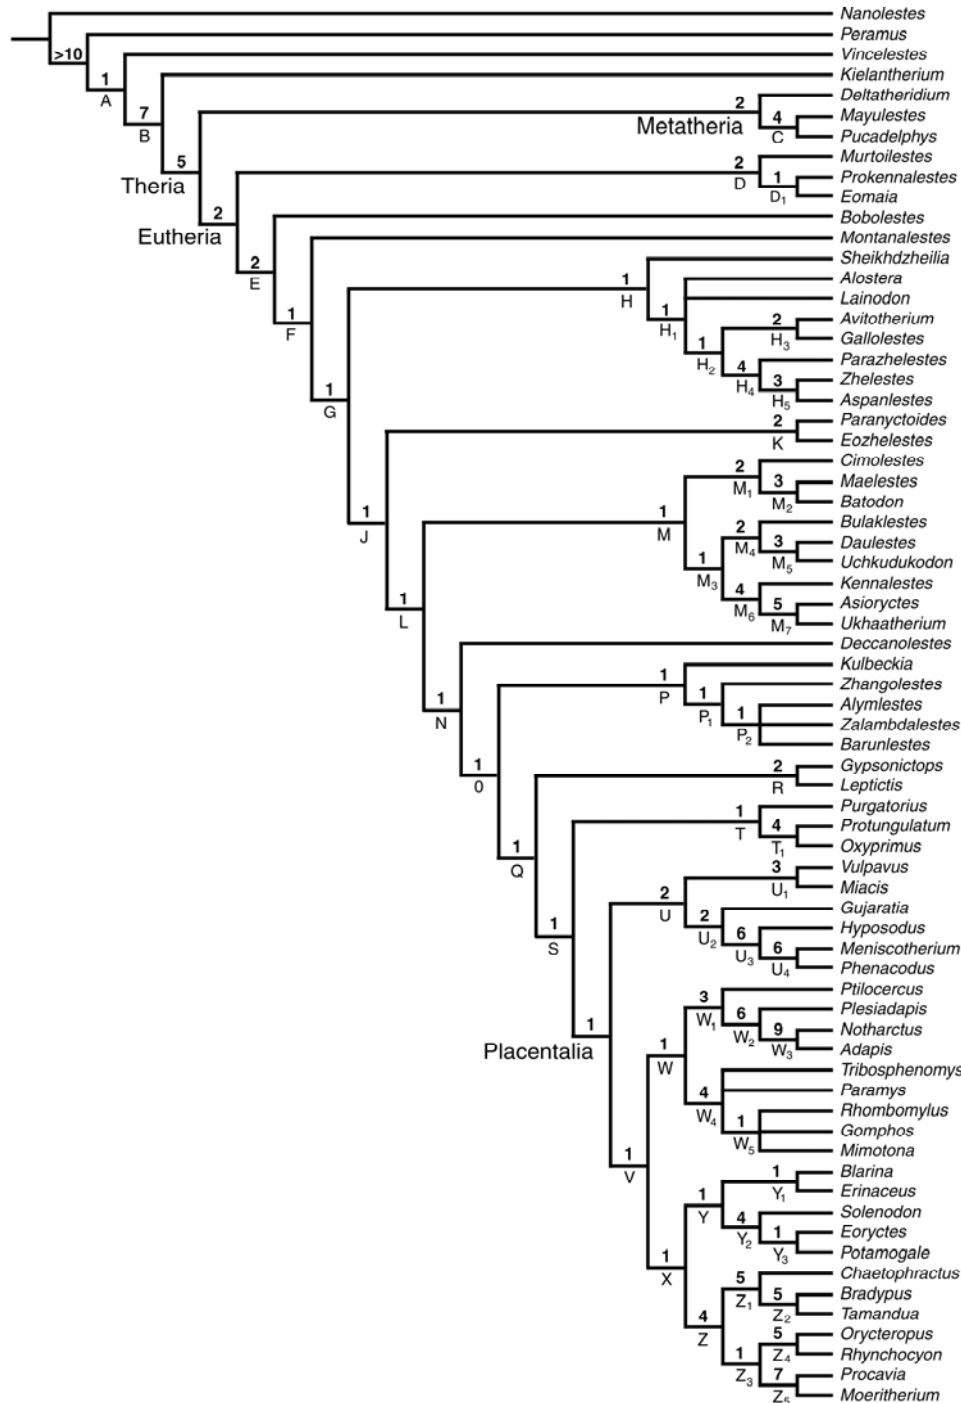

Supplementary Figure 6. Heuristic searches of the taxon-character matrix in Part IV. with multistate characters unordered employing the program TNT (Goloboff et al., 2003) yielded three most parsimonious trees (tree length = 2296; Consistency Index = 0.261; Retention Index = 0.551). The strict consensus of these three trees is shown above.

Numbers above nodes indicate Bremer branch support, and letters below nodes refer to nodes in the diagnoses. Bremer supports are calculated from a pool of 50,000 suboptimal trees of up to 10 steps longer than the shortest trees obtained. To recover the same results in PAUP (Swofford, 2002), multistate taxa should be set to “uncertainty” and zero-length branches should be set to collapse if their minimum length is zero (“amb-“).

Diagnoses of Nodes (characters in common on strict consensus tree)

Node A – *Vincelestes* + (*Kielantherium* + Theria)

- 68 (1) M2 parastylar lobe less than 30% but more than 20% of tooth length
- 84 (1) M2 postmetacrista non-cuspedate
- 103 (1) lingual root on upper molars supporting trigon

Node B – *Kielantherium* + Theria

- 64 (1) M2 wider than long (length more than 75% but less than 99% of width)
- 65 (1) M2 stylar shelf less than 50% but more than 25% total tooth width
- 66 (1) M2 parastylar and metastylar lobes of similar labial extent
- 74 (2) M2 stylar cusp E small to indistinct
- 75 (2) M2 preparacingulum continuous between stylar margin and paraconule or paraconule position
- 87 (1) M2 postvallum shear with second rank that does not extend labial to metaconal base
- 115 (1) multicuspidate lower molar talonid
- 118 (1) m2 trigonid with some anteroposterior shortening relative to talonid (trigonid 50% to 75% of tooth length)

Theria

- 70 (0) M2 stylar cusp A subequal to larger than B
- 88 (2) M2 paraconule prominent, midway or closer to paracone
- 89 (2) M2 metaconule prominent, midway or closer to protocone
- 91 (1) M2 conular region moderate (0.31–0.50 total tooth length)
- 121 (1) hypoconulid of ultimate lower molar tall and sharply recurved
- 122 (1) m2 entoconid smaller than hypoconid and/or hypoconulid

Metatheria

- 3 (1) seven postcanine tooth families
- 22 (1) staggered lower incisor
- 29 (2) three premolars
- 47 (1) first lower premolar oblique
- 62 (1) molar size increasing posteriorly
- 130 (3) posteriormost mental foramen at ultimate premolar first molar junction or more posterior
- 139 (0) labial mandibular foramen absent
- 140 (0) condyloid crest absent
- 142 (1) angular process shelf along ventral border of mandible
- 143 (1) angular process medially directed

- 154 (1) “Meckelian” groove absent
- 156 (1) “coronoid” facet absent
- 179 (0) lacrimal foramen exposed on face
- 183 (1) palatal process of premaxilla reaches nearly or to canine alveolus
- 252 (1) glenoid fossa trough-like
- 270 (1) medial course of internal carotid artery
- 274 (2) stapedial artery absent
- 297 (2) foramen for ramus superior absent
- 299 (2) ascending canal absent
- 313 (1) opening for inferior petrosal sinus separate from jugular foramen
- 327 (1) sulcus for anterior tributary of transverse sinus posterolateral to subarcuate fossa

Node C – *Mayulestes* + *Pucadelphys*

- 32 (1) first upper premolar procumbent
- 71 (2) M2 stylar cusp B subequal to paracone
- 77(2) M2 metacone subequal or larger than paracone
- 78 (2) M2 metacone lingual relative to paracone
- 79 (1) M2 paracone and metacone bases separated
- 93 (1) M2 protocone anteroposteriorly expanded
- 94 (1) M2 protocone procumbent
- 109 (1) m2 mesiolingual vertical crest of paraconid keeled
- 113 (1) m2 protocristid transverse
- 116 (3) m2 cristid obliqua attaching below middle posterior of protoconid
- 120 (3) m2 hypoconulid close approximation to entoconid
- 126 (1) m2 labial postcingulid present
- 185 (1) incisive foramen intermediate in length (length of 3 to 4 incisors)
- 190 (1) palatal expanded posterior to ultimate molar
- 255 (1) glenoid process of alisphenoid present
- 272 (1) deep groove for internal carotid artery on anterior pole of promontorium
- 300 (1) stapedius fossa small and shallow
- 312 (1) jugular foramen larger than fenestra cochleae

Eutheria

- 31 (1) tall, trenchant upper premolar in penultimate position
- 36 (1) penultimate upper premolar protocone small lingual bulge
- 40 (1) ultimate upper premolar protocone smaller than paracone
- 55 (1) ultimate lower premolar paraconid distinctive but low
- 118 (2) m2 trigonid anteroposteriorly compressed (less than 50% total length)
- 175 (1) preorbital length more than one-third skull length
- 202 (1) zygomatic arch delicate
- 293 (1) epitympanic recess lateral wall with extensive squamosal contribution
- 380 (1) ossified patella present
- 391 (1) astragalar medial plantar tuberosity protruding
- 400 (1) calcaneal sustentacular facet with dorsal mesiolateral orientation

Node D – *Murtoilestes* + (*Prokennalestes* + *Eomaia*)

- 69 (1) M2 preparastyle present
- 84 (0) M2 postmetacrista cusped
- 88 (1) M2 paraconule prominent, closer to protocone

Node D<sub>1</sub> – *Prokennalestes* + *Eomaia*

- 66 (0) M2 parastylar lobe labial relative to metastylar lobe
- 77 (0) M2 metacone noticeably smaller than paracone
- 89 (1) M2 metaconule prominent, closer to protocone

## Node E

- 71 (1) M2 stylar cusp B vestigial or absent
- 73 (0) M2 stylar cusp D absent
- 90 (1) M2 internal conular cristae distinctive and wing-like
- 94 (1) M2 protocone procumbent
- 96 (1) M2 protocone height approaching paracone and metacone
- 157 (2) mandibular foramen recessed dorsally from ventral margin, but below alveolar plane

## Node F

- 60 (1) ultimate lower premolar anterolingual cingulid present
- 154 (1) “Meckelian” groove absent

## Node G

- 57 (1) ultimate lower premolar talonid as wide as anterior portion of crown
- 119 (2) m2 talonid width subequal to wider than trigonid
- 122 (2) m2 entoconid larger than hypoconid and/or hypoconulid
- 156 (1) “coronoid” facet absent

Node H – Zhelestidae – defined here as the clade formed by *Sheikhdzheilia*, *Zhelestes*, and all their descendants

- 65 (2) M2 stylar shelf less than 25% total tooth width
- 83 (2) M2 postmetacrista weak or absent
- 91 (2) M2 conular region wide (greater than .51 total tooth length)
- 96 (2) M2 protocone height subequal to paracone and metacone
- 120 (3) m2 hypoconulid close approximation to entoconid

Node H<sub>1</sub>

- 116 (3) m2 cristid obliqua attaching below middle posterior of protoconid

Node H<sub>2</sub>

- 126 (1) m2 labial postcingulid present

Node H<sub>3</sub> – *Avitotherium* + *Gallolestes*

- 97 (1) M2 precingulum present
- 114 (0) m2 anterior and labial (mesio-buccal) cingular cuspule (f) present

Node H<sub>4</sub> – *Parazhelestes* + (*Zhelestes* + *Aspanlestes*)

- 53 (1) penultimate lower premolar metaconid swelling
- 55 (0) ultimate lower premolar paraconid indistinctive
- 66 (2) M2 metastylar lobe labial relative to parastylar lobe
- 69 (1) M2 preparastyle present
- 113 (1) m2 protocristid transverse
- 116 (2) m2 cristid obliqua attaching labial to notch in protocristid
- 121 (0) hypoconulid of ultimate lower molar short and erect

Node H<sub>5</sub> – *Zhelestes* + *Aspanlestes*

- 43 (1) ultimate upper premolar precingulum present
- 44 (1) ultimate upper premolar postcingulum present
- 64 (2) M2 much wider than long (length less than 75% of width)

## Node J

- 42 (2) Ultimate upper premolar parastylar lobe larger than metastylar
- 95 (1) moderate labial shift of M2 protocone

Node K – *Paranyctoides* + *Eozhelestes*

- 25 (1) lower canine small
- 52 (1) penultimate lower premolar paraconid distinctive
- 126 (1) m2 labial postcingulid present

## Node L

- 3 (1) seven postcanine tooth families
- 8 (1) three lower incisors
- 29 (1) four premolars
- 39 (1) penultimate upper premolar three roots

## Node M

- 77 (0) M2 metacone noticeably smaller than paracone
- 79 (0) M2 metacone and paracone bases adjoined
- 119 (1) m2 talonid width narrower than trigonid
- 194 (1) minor palatine foramen formed by palatine and pterygoid
- 226 (1) frontal length on midline less than half that of parietal
- 296 (1) fossa incudis anterior relative to fenestra vestibuli
- 315 (1) hypoglossal foramen size housed in opening larger than jugular foramen
- 321 (0) petrosal roof for external acoustic meatus

Node M<sub>1</sub> – Cimolestidae

- 17 (1) anteriormost lower incisor procumbent
- 21 (1) posterior lower incisor(s) procumbent
- 33 (1) first upper premolar one root
- 48 (1) first lower premolar one root
- 57 (0) ultimate lower premolar talonid narrower than anterior portion of crown

95 (0) no labial shift of M2 protocone

Node M<sub>2</sub> – *Maelestes* + *Batodon*

65 (2) M2 stylar shelf less than 25% total tooth width  
 75 (1) M2 preparacingulum interrupted between stylar margin and paraconule  
 113 (1) m2 protocristid transverse  
 120 (2) m2 hypoconulid lingually placed with slight approximation to entoconid  
 129 (2) anteriormost mental foramen below second premolar

Node M<sub>3</sub> – *Asioryctitheria* sensu Archibald and Averianov, 2006

26 (0) lower canine two roots  
 94 (0) M2 protocone not procumbent  
 122 (1) m2 entoconid smaller than hypoconid and/or hypoconulid  
 216 (2) postorbital process absent  
 258 (1) postglenoid foramen medial or anterior to postglenoid process

Node M<sub>4</sub> – *Bulaklestes* + (*Daulestes* + *Uchkudukodon*)

39 (0) penultimate upper premolar two roots  
 67 (1) M1 parastylar lobe anterior to paracone  
 121 (2) ultimate lower molar hypoconulid posteriorly procumbent

Node M<sub>5</sub> – *Daulestes* + *Uchkudukodon*

70 (0) M2 stylar cusp A subequal to larger than B  
 71 (0) M2 stylar cusp B distinctive  
 95 (0) no labial shift of M2 protocone  
 111 (2) m2 trigonid anteroposteriorly compressed

Node M<sub>6</sub> – *Kennalestes* + (*Asioryctes* + *Ukhaatherium*)

49 (1) diastema separating first and second lower premolars present  
 113 (1) m2 protocristid transverse  
 135 (2) tilting of coronoid process near vertical (95° to 105°)  
 270 (1) medial course of internal carotid artery  
 340 (1) atlas neural arch fused

Node M<sub>7</sub> – *Asioryctes* + *Ukhaatherium*

8 (0) four lower incisors  
 36 (2) penultimate upper premolar protocone with enlarged basin  
 41 (2) ultimate upper premolar metacone large  
 52 (1) penultimate lower premolar paraconid distinctive  
 111 (2) m2 trigonid anteroposteriorly compressed  
 129 (0) anteriormost mental foramen below incisors (or anteriormost mandible)  
 200 (1) maxillary-jugal contact bifurcated

Node N

38 (1) penultimate upper premolar parastylar lobe well developed  
 56 (2) ultimate lower premolar metaconid large

- 96 (2) M2 protocone height subequal to paracone and metacone
- 404 (1) tuber calcis ventral curvature absent
- 405 (1) calcaneal facet for fibula absent

## Node O

- 65 (2) M2 stylar shelf less than 25% total tooth width
- 68 (2) M2 parastylar lobe 20% or less of tooth length
- 76 (2) upper molar deep ectoflexus strongly reduced or absent
- 83 (2) M2 postmetacrista weak or absent
- 91 (2) M2 conular region wide (greater than .51 total tooth length)
- 111 (2) m2 trigonid anteroposteriorly compressed
- 385 (2) astragalus, angle between medial and lateral facets for tibia 90°
- 395 (2) astragalar canal absent

Node P – *Zalambdalestidae*

- 14 (2) ultimate upper incisor in maxilla
- 15 (1) anteriormost lower incisor size greatly enlarged
- 17 (1) anteriormost lower incisor procumbent
- 20 (1) anteriormost lower incisor enamel discontinuous posteriorly
- 21 (1) posterior lower incisor(s) procumbent
- 120 (2) m2 hypoconulid lingually placed with slight approximation to entoconid
- 130 (1) posteriormost mental foramen below penultimate premolar
- 182 (1) translacrimal canal present
- 184 (1) premaxillary-maxillary suture on palate wedge-shaped, pointing anteriorly
- 270 (1) medial course of internal carotid artery

Node P<sub>1</sub> – *Zhangolestes* + (*Alymlestes* + *Zalambdalestes* + *Barunlestes*)

- 25 (1) lower canine small
- 60 (0) ultimate lower premolar anterolingual cingulid absent
- 116 (3) m2 cristid obliqua attaching below middle posterior of protoconid

Node P<sub>2</sub> – *Alymlestes* + *Zalambdalestes* + *Barunlestes*

- 108 (1) m2 paraconid on lingual margin
- 120 (3) m2 hypoconulid close approximation to entoconid

## Node Q

- 40 (2) ultimate upper premolar protocone approaches paracone in height
- 44 (1) ultimate upper premolar postcingulum present
- 97 (2) M2 precingulum present, reaching labially passed paraconule
- 98 (2) M2 postcingulum present, reaching labially passed metaconule
- 150 (2) condyle more than molar length above tooth row
- 163 (1) lateral margin of paracanine fossa formed by maxilla and premaxilla
- 170 (1) naso-frontal suture with no medial process of frontals wedged between nasals
- 173 (1) frontal-maxillary contact on rostrum
- 183 (1) palatal process of premaxilla reaches nearly or to canine alveolus



- 216 (2) postorbital process absent
- 235 (1) vomer contacts pterygoid
- 236 (1) pterygoids do not contact on midline
- 238 (0) midline crest in basipharyngeal canal absent
- 244 (2) exit for maxillary nerve in front of alisphenoid
- 246 (2) foramen ovale in alisphenoid
- 248 (1) alisphenoid canal present
- 312 (1) jugular foramen larger than fenestra cochleae
- 333 (2) posttemporal canal absent
- 341 (1) atlas neural arch and intercentrum fused
- 342 (1) axis without suture between atlantal and axial parts
- 371 (1) epipubic bones absent

Node R – *Gypsonictops* + *Leptictis*

- 43 (1) ultimate upper premolar precingulum present
- 45 (1) ultimate upper premolar conules prominent
- 116 (3) m2 cristid obliqua attaching below middle posterior of protoconid

Node S

- 31 (2) tall, trenchant upper premolar absent
- 77 (2) M2 metacone subequal or larger than paracone
- 93 (1) M2 protocone anteroposteriorly expanded
- 268 (0) epitympanic wing medial promontorium absent

Node T – *Purgatorius* (*Protungulatum* + *Oxyprimus*)

- 57 (0) ultimate lower premolar talonid narrower than anterior portion of crown
- 95 (2) substantial labial shift of M2 protocone
- 111 (1) m2 trigonid more acute

Node T<sub>1</sub> – *Protungulatum* + *Oxyprimus*

- 52 (1) penultimate lower premolar paraconid distinctive
- 62 (1) molar size increasing posteriorly
- 87 (2) M2 postvallum shear with second rank extending to metastylar lobe
- 89 (1) M2 metaconule prominent, closer to protocone
- 119 (1) m2 talonid narrower than trigonid
- 126 (1) m2 labial postcingulid present

Placentalia

- 38 (0) penultimate upper premolar parastylar lobe absent or small
- 60 (0) ultimate lower premolar anterolingual cingulid absent
- 98 (3) M2 postcingulum present, extending to labial margin
- 140 (0) condyloid crest absent
- 311 (2) inferior petrosal sinus endocranial

Node U

- 49 (1) diastema separating first and second lower premolars present, subequal to

- one tooth-root diameter or more
- 143 (0) angular process posteriorly directed
- 149 (1) condyle cylindrical
- 204 (0) palatine reaches infraorbital canal
- 230 (1) nuchal crest posterior relative to foramen magnum
- 249 (1) posterior opening of alisphenoid canal in common depression with  
foramen ovale
- 278 (0) promontorium flat
- 279 (1) promontorium higher relative to basioccipital
- 289 (1) tensor tympani fossa circular pit
- 392 (2) astragalar neck present, similar in length to body width
- Node U<sub>1</sub> – Carnivora (*Vulpavus* + *Miacis*)
- 31 (0) tall, trenchant upper premolar in ultimate position
- 32 (1) first upper premolar procumbent
- 40 (1) ultimate upper premolar protocone shorter than paracone
- 42 (3) ultimate upper premolar metastylar lobe larger than parastylar lobe
- 44 (0) ultimate upper premolar postcingulum absent
- 57 (0) ultimate lower premolar talonid narrower than anterior portion of crown
- 96 (1) M2 protocone tall, approaching paracone and metacone
- 98 (1) M2 postcingulum present
- 107 (1) m2 paraconid subequal in height to metaconid
- 108 (1) m2 paraconid on lingual margin
- 127 (1) ultimate lower molar smaller than penultimate lower molar
- 147 (1) angular process anterior relative to condylar process
- 224 (1) orbitotemporal canal absent
- 227 (1) frontoparietal suture with anterior process of parietal off the midline
- 262 (1) posttympanic crest of squamosal present
- 285 (2) bony shelf lateral to promontorium (lateral trough or tegmen tympani)  
prolonged anterior to promontorium
- 302 (0) cochlear fossula weak or absent
- 305 (0) paroccipital process vertical
- 395 (1) astragalar canal, dorsal foramen only
- Node U<sub>2</sub> – *Gujaratia* (*Hyopsodus* + (*Meniscotherium* + *Phenacodus*))
- 43 (1) ultimate upper premolar precingulum present
- 63 (1) molar cusp form inflated, robust
- 64 (1) M2 wider than long (length more than 75% but less than 99% of width)
- 117 (2) m2 trigonid height subequal to talonid height
- 126 (1) m2 labial postcingulid present
- 364 (1) humeral articulation on radius two fossae
- 367 (1) radial articulation with carpals two fossae
- Node U<sub>3</sub> – *Hyopsodus* + (*Meniscotherium* + *Phenacodus*)
- 58 (1) ultimate lower premolar talonid with two cusps
- 86 (2) M2 postprotocrista absent

- 87 (0) M2 postvallum shear present but only by first rank: postmetacrista
- 99 (2) M2 hypocone on postcingulum present, subequal to protocone
- 145 (1) angular process rounded, base as wide as tip
- 221 (1) optic foramen broadly separated from sphenorbital fissure
- 226 (1) frontal length on midline less than half that of parietal
- 234 (0) choanae as wide as posterior palate
- 267 (1) basicochlear fissure patent
- 333 (1) posttemporal canal present, small

Node U<sub>4</sub> – *Meniscotherium* + *Phenacodus*

- 11 (4) anteriormost upper incisor spatulate
- 45 (1) ultimate upper premolar conules prominent
- 70 (1) M2 stylar cusp A distinct but smaller than B
- 72 (1) M2 stylar cusp C, mesostyle present
- 82 (1) M2 centrocrista V-shaped
- 85 (2) M2 preprotocrista absent
- 185 (1) incisive foramen intermediate in length (length of 3 to 4 incisors)
- 289 (0) tensor tympani fossa shallow
- 354 (1) acromion proximal to glenoid articulation
- 373 (1) articular surface of femoral head limited to sphere of head
- 395 (0) astragalar canal present

## Node V – (Euarchontaglires + (“Eulipotyphla” + (Xenarthra + “Afrotheria”)))

- 3 (2) six postcanine tooth families
- 17 (1) anteriormost lower incisor procumbent
- 21 (1) posterior lower incisor(s) procumbent
- 23 (1) upper canine small
- 29 (2) three premolars
- 86 (0) M2 postprotocrista extends to mid-lingual surface of metacone
- 99 (2) M2 hypocone on postcingulum present, subequal to protocone
- 114 (2) m2 anterior and labial (mesio-buccal) cingular cuspule (f) present with shelf continuing along buccal border
- 152 (1) mandibular symphysis extends posteriorly to p2
- 157 (3) mandibular foramen recessed dorsally from ventral margin, at or above alveolar plane
- 209 (1) maxilla not excluded from medial orbital wall
- 210 (1) frontal and maxilla contact in medial orbital wall
- 308 (0) “tympanic process” absent
- 370 (1) pubic symphysis narrow

## Node W – Euarchontaglires

- 116 (3) m2 cristid obliqua attaching below middle posterior of protoconid
- 161 (2) premaxilla, facial process contacts frontal posteriorly
- 196 (1) posterior edge of anterior zygomatic root aligned with anterior molars
- 227 (1/2) frontoparietal suture with anterior process of parietal off/on midline
- 286 (1) Width of bony shelf lateral to promontorium (lateral trough or tegmen)

- tympani) expanded anteriorly
- 300 (1) stapedius fossa small and shallow
- 356 (0) greater tubercle of humerus ventral to humeral head
- Node  $W_1$  – Euarchonta (*Ptilocercus* + (*Plesiadapis* + (*Notharctus* + *Adapis*)))
- 126 (1) M2 labial postcingulid present
- 179 (0) lacrimal foramen exposed on face
- 218 (1) postorbital bar present
- 274 (1) canal for stapedial artery on promontorium
- 294 (1) fossa incudis separated from epitympanic recess
- 317 (1) ectotympanic aphaneric or hidden
- 318 (0) ectotympanic ring-like
- 374 (0) greater trochanter lower than femoral head
- 375 (0) lesser trochanter of femur large
- 389 (1) sustentacular and navicular facets of astragalus contact
- 401 (1) calcaneal sustentacular facet expanded onto body
- 402 (2) calcaneal anterior peroneal tubercle at a distance from anterior end

- Node  $W_2$  – Primates (*Plesiadapis* + (*Notharctus* + *Adapis*))
- 43 (1) ultimate upper premolar precingulum present
- 58 (1) ultimate lower premolar talonid with two cusps
- 62 (1) molar size increasing posteriorly
- 151 (1) mandibular symphysis deep
- 203 (0) roots of molars not exposed in orbit floor
- 224 (1) orbitotemporal canal absent
- 226 (1) frontal length on midline less than half that of parietal
- 244 (1) exit for maxillary nerve within alisphenoid
- 248 (0) alisphenoid canal absent
- 251 (1) glenoid fossa partially on braincase
- 269 (2) rostral tympanic process of petrosal tall ridge, contributing to ventral bulla
- 301 (1) cochlear canaliculus visible canal in middle ear space
- 303 (1) fenestra cochleae posterior to fenestra vestibuli
- 304 (1) posterior septum shields fenestra cochleae
- 308 (2) “tympanic process” present, high
- 319 (0) anterior crus of ectotympanic does not broadly contacts facet on squamosal
- 320 (1) elongate ossified external acoustic canal
- 339 (1) atlantal foramen absent
- 396 (1) posterior trochlear shelf of astragalus strong
- 408 (1) deep groove for tendon of flexor fibularis present on calcaneum

- Node  $W_3$  – *Notharctus* + *Adapis*
- 3 (1) seven postcanine tooth families
- 8 (2) two lower incisors
- 16 (4) anteriormost lower incisor spatulate
- 17 (0) anteriormost lower incisor not procumbent
- 29 (1) four premolars

- 39 (0) penultimate upper premolar two roots
- 106 (1) m2 paraconid present
- 116 (2) m2 cristid obliqua attaching labial to notch in protocristid
- 117 (2) m2 trigonid height subequal to talonid height
- 129 (1) anteriormost mental foramen below p1
- 153 (1) mandibular symphysis fused
- 161 (1) premaxilla, facial process extends posteriorly beyond canine
- 169 (1) nasal does not overhangs external nasal aperture
- 181 (1) lacrimal foramen with maxillary contribution
- 196 (0) posterior edge of anterior zygomatic root aligned with last molar
- 261 (0) entoglenoid process of squamosal absent
- 390 (0) astragalar sustentacular facet does not reach medial edge of neck
- 397 (1) calcaneum narrow with sustentacular and ectal facets in line with long axis
- 403 (2) calcaneal plantar tubercle more proximal
- 407 (2) Cuboid facet much wider (mediolateral) than deep (dorsoventral)

Node W<sub>4</sub> – Glires

- 3 (3) five or fewer postcanine families
- 5 (1) lower diastema behind incisors enlarged
- 13 (1) anteriormost upper incisor enamel discontinuous posteriorly
- 16 (2) anteriormost lower incisor anteroposteriorly compressed
- 18 (1) anteriormost lower incisor ever-growing, with large apical opening
- 19 (3) anteriormost lower incisor root extending posteriorly below molars
- 20 (1) anteriormost lower incisor enamel discontinuous posteriorly
- 23 (2) upper canine absent
- 29 (3) two premolars
- 82 (2) M2 centrocrista absent
- 95 (2) substantial labial shift of M2 protocone
- 105 (1) metastylar lobe on ultimate molar present
- 106 (1) paraconid absent
- 114 (3) anterior and labial (mesio-buccal) cingular cuspule (f) absent
- 138 (1) masseteric fossa extending anteriorly onto mandibular body

Node W<sub>5</sub> – Duplicidentata (*Rhombomylus* + *Gomphos* + *Mimotona*)

- 75 (0) M2 preparacingulum absent

## Node X – “Eulipotyphla + (“Afrotheria” + Xenarthra)

- 96 (1) M2 protocone height tall, approaching paracone and metacone
- 120 (0) m2 hypoconulid absent
- 135 (2) tilting of coronoid process near vertical (95° to 105°)
- 143 (3) angular process posterodorsally directed
- 146 (1) angular process vertical position at or near the alveolar border
- 190 (1) palatal expansion posterior to ultimate molar
- 383 (1) tibia and fibula fused distally
- 403 (0) calcaneal plantar tubercle absent

## Node Y – “Eulipotyphla”

- 57 (0) ultimate lower premolar talonid narrower than anterior portion of crown
- 95 (0) no labial shift of M2 protocone
- 130 (3) posteriormost mental foramen at ultimate premolar and first molar  
junction or more posterior
- 169 (1) nasal does not overhang external nasal aperture
- 174 (1) maxillary process of frontal elongate and thin
- 202 (2) zygomatic arch incomplete
- 260 (1) suprimeatal foramen present
- 307 (1) crista interfenestralis and caudal tympanic process of petrosal connected  
by curved ridge
- 308 (2) “tympanic process” present, high
- 318 (1) ectotympanic fusiform
- 407 (1) cuboid facet depth and width subequal

Node Y<sub>1</sub> – *Blarina* + *Erinaceus*

- 8 (2) two lower incisors
- 9 (1) anteriormost upper incisor alveoli separated by broad gap
- 27 (1) lower canine procumbent
- 64 (1) M2 wider than long (length more than 75% but less than 99% of width)
- 85 (0) M2 preprotocrista does not extend labially passed base of paracone
- 101 (1) M2 four roots
- 102 (1) ultimate molar two roots
- 108 (1) m2 paraconid on lingual margin
- 116 (3) m2 cristid obliqua attaching below middle posterior of protoconid
- 127 (1) ultimate lower molar size smaller than penultimate lower molar
- 179 (0) lacrimal foramen exposed on face
- 319 (0) anterior crus of ectotympanic does not broadly contact facet on squamosal

Node Y<sub>2</sub> – *Solenodon* + (*Eoryctes* + *Potamogale*)

- 17 (0) anteriormost lower incisor not procumbent
- 42 (2) ultimate upper premolar parastylar lobe larger than metastylar lobe
- 55 (1) ultimate lower premolar paraconid distinctive but low
- 76 (1) deep ectoflexus on penultimate and preceding molars
- 86 (1) M2 postprotocrista extends distal to metacone
- 114 (0) m2 anterior and labial (mesio-buccal) cingular cuspule (f) present
- 117 (0) m2 trigonid height twice or more talonid height
- 119 (0) m2 talonid very narrow, subequal to base of metaconid
- 235 (0) vomer does not contact pterygoid
- 285 (1) bony shelf lateral to promonotorium (lateral trough or tegmen tympani)  
confined posterolaterally
- 348 (1) five or fewer lumbar vertebrae
- 357 (1) deltopectoral crest reaches distal half of humerus

Node Y<sub>3</sub> – *Eoryctes* + *Potamogale*

- 44 (0) ultimate upper premolar postcingulum absent

- 176 (1) lacrimal absent
- 210 (0) frontal and maxilla do not contact in medial orbital wall
- 265 (1) alisphenoid tympanic process present
- 266 (1) basisphenoid tympanic process present
- 305 (0) paroccipital process vertical

## Node Z – “Afrotheria” + Xenarthra

- 129 (0) anteriormost mental foramen below incisors (or anteriormost mandible)
- 134 (1) coronoid process narrow, subequal to or less than one molar length
- 138 (1) masseteric fossa extending anteriorly onto mandibular body
- 152 (2) mandibular symphysis extends posteriorly to p3 or more posterior
- 203 (0) roots of molars not exposed in orbit floor
- 293 (2) epitympanic recess lateral wall with no squamosal contribution
- 322 (1) entotympanic present
- 367 (1) radial articulation with carpals two fossae

Node Z<sub>1</sub> – Xenarthra (*Chaetophractus* + (*Bradypus* + *Tamandua*))

- 2 (1) simple peg-like teeth without enamel
- 130 (0) posteriormost mental foramen in canine and anterior premolar region
- 132 (0) space between ultimate molar and coronoid process absent
- 140 (1) condyloid crest present
- 179 (0) lacrimal foramen exposed on face
- 188 (3) multiple small major palatine foramina
- 191 (0) postpalatine torus absent
- 228 (1) temporal lines do not meet on midline to form sagittal crest
- 239 (2) entopterygoid process approaches ear region
- 273 (1) perbullar carotid canal present
- 281 (2) tympanic aperture of hiatus Fallopii absent
- 285 (1) bony shelf lateral to promontorium (lateral trough or tegmen tympani)  
confined posterolaterally
- 291 (1) hypotympanic sinus formed by squamosal, petrosal, and alisphenoid
- 294 (1) fossa incudis separated from epitympanic recess
- 331 (0) anterior semicircular canal does not form lateral wall of subarcuate fossa  
aperture
- 348 (1) six or more lumbar vertebrae
- 349 (1) xenarthrous articulations on lumbar vertebrae present
- 351 (1) sacral vertebrae fused to pelvis

Node Z<sub>2</sub> – *Bradypus* + *Tamandua*

- 143 (0) angular process posteriorly directed
- 202 (2) zygomatic arch incomplete
- 233 (2) foramina for temporal rami absent
- 234 (0) choanae as wide as posterior palate
- 251 (1) glenoid fossa partially on braincase
- 335 (1) posttemporal canal position dorsal to external acoustic meatus
- 353 (0) suprascapular incisure absent

- 356 (0) greater tubercle of humerus ventral to humeral head
- 372 (1) articular surface of femoral head limited to sphere of head
- 374 (0) greater trochanter lower than femoral head
- 376 (0) third trochanter of femur absent
- 383 (0) tibia and fibula distally fused
- 393 (0) astragalar head convexity absent
- 405 (1) calcaneal facet for fibula absent

Node Z<sub>3</sub> – “Afrotheria” ((*Orycteropus* + *Rhynchocyon*) + (*Moeritherium* + *Procavia*))

- 4 (1) upper diastema narrow between canine and premolars
- 14 (1) ultimate upper incisor between maxilla and premaxilla
- 252 (4) glenoid fossa convex, open anteriorly
- 300 (1) stapedius fossa small and shallow
- 370 (0) pubic symphysis extensive
- 388 (1) cotylar fossa on astragalus present
- 391 (1) astragalar medial planar tuberosity protruding

Node Z<sub>4</sub> – *Orycteropus* + *Rhynchocyon*

- 177 (0) facial process of lacrimal large, triangular and pointed anteriorly
- 202 (1) zygomatic arch delicate
- 204 (0) palatine reaches infraorbital canal
- 205 (0) lacrimal contributes to maxillary foramen
- 208 (1) sphenopalatine foramen proximal to maxillary foramen
- 210 (0) frontal and maxilla do not contact in medial orbital wall
- 313 (1) jugular foramen separated from opening for inferior petrosal sinus
- 318 (1) ectotympanic fusiform
- 336 (2) one mastoid foramen in mastoid
- 347 (0) 13 or fewer thoracic vertebrae
- 381 (1) articulation between femur and fibula present
- 384 (1) trochlear groove moderately deep (U-shaped)

Node Z<sub>5</sub> – *Moeritherium* + *Procavia*

- 5 (1) lower diastema behind incisors enlarged
- 8 (2) two lower incisors
- 43 (1) ultimate upper premolar precingulum present
- 86 (2) M2 postprotocrista absent
- 87 (3) M2 postvallum shear absent
- 125 (1) m2 hypolophid present
- 130 (1) posteriormost mental foramen below penultimate premolar
- 131 (1) mandibular body deep and short
- 145 (1) angular process rounded, base as wide as tip
- 153 (1) mandibular symphysis fused
- 175 (0) preorbital length less than one third skull length
- 247 (1) foramen ovale on ventral surface of skull
- 254 (0) glenoid process of jugal present, with articular facet
- 337 (1) amastoidy or lack of occipital exposure of mastoid present



354 (2) acromion absent  
360 (1) entepicondylar foramen absent

## Part VII. Wilcoxon Rank Sum Tests

Wilcoxon rank sum (or Templeton) and winning-sites test results of competing topologies as reported in PAUP (Swofford, 2002). Tree numbers correspond to those given below the table. Rejected competing hypotheses are identified with asterisks. P values are given for 2-tailed tests. Those for 1-tailed tests do not change acceptance/rejection of null hypothesis ( $\alpha = 0.05$ ), except in moving Templeton P for tree #5 (*Purgatorius*-Primates) from 0.0495 to over 0.05 (Rohlf and Sokal, 1994: table V).

Tree #1 is one of the three optimal trees. Tree #2 includes a Zalambdalestidae-Glires clade (Archibald et al., 2001). Tree #3 includes a Zalambdalestidae-Duplicidentata clade (Van Valen, 1964). Tree #4 includes Ungulatomorpha (Zhelestidae with “condylarths” + Cetartiodactyla) (Archibald, 1996; Nessov et al., 1998; Archibald et al., 2001; Kielan-Jaworowska et al., 2004). Tree #5 includes *Purgatorius* with Primates (Clemens, 1974, 2004; Van Valen, 1994). Tree #6 includes *Batodon* with “Eulipotyphla” (McKenna and Bell, 1997). Tree #7 includes *Gypsonictops* and *Leptictis* with “Eulipotyphla” (Novacek, 1986). Tree #8 includes *Deccanolestes* with Euarchonta and Tree #9 includes *Purgatoris* and *Deccanolestes* as the first and second outgroups to Euarchonta (Kielan-Jaworowska et al., 2004). Tree #10 places Cimolestidae (*Cimolestes*, *Batodon*, and *Maelestes*) with Carnivora (*Cimolestes* and *Batodon* were allocated to Ferae by Kielan-Jaworowska et al., 2004). Tree #11 places *Hyopsodus*, *Phenacodus*, and *Meniscotherium* with Paenugulata within Afrotheria (Asher et al., 2003). Tree #12 includes Zhelestidae with Paleocene and Eocene “condylarths”, Carnivora, and

Cetartiodactyla (Averianov and Archibald, 2005). Tree #13 includes Ungulata, i.e., Paleocene and Eocene "condylarths" with Cetartiodactyla (Archibald, 1998).

Lengths of trees in memory:

Character-status summary:

Of 408 total characters:

All characters are of type 'unord'

All characters have equal weight

1 character is constant

20 variable characters are parsimony-uninformative

Number of parsimony-informative characters = 387

Gaps are treated as "missing"

Multistate taxa interpreted as uncertainty ("min" values for CI, RI, and RC are minimum-possible character lengths)

|        |      |      |      |      |      |      |      |      |      |      |      |      |      |
|--------|------|------|------|------|------|------|------|------|------|------|------|------|------|
| Tree # | 1    | 2    | 3    | 4    | 5    | 6    | 7    | 8    | 9    | 10   | 11   | 12   | 13   |
| Length | 2296 | 2331 | 2359 | 2321 | 2305 | 2319 | 2316 | 2315 | 2319 | 2330 | 2326 | 2318 | 2321 |

Templeton (Wilcoxon signed-ranks) and winning-sites (sign) tests:

| Tree             | Length | Rank sums*        | Templeton<br>N | z       | P**      | Winning-sites<br>counts | P**      |
|------------------|--------|-------------------|----------------|---------|----------|-------------------------|----------|
| 1 best           | 2296   | (best)            |                |         |          |                         |          |
| 2 zalam-glires   | 2331   | 1998.0<br>-703.0  | 73             | -4.0964 | <0.0001* | 54<br>-19               | 0.0001*  |
| 3 zalam-lago     | 2359   | 4316.0<br>-1040.0 | 103            | -6.2076 | <0.0001* | 83<br>-20               | <0.0001* |
| 4 zhe-ungulates  | 2321   | 1041.0<br>-390.0  | 53             | -3.2555 | 0.0011*  | 38<br>-15               | 0.0025*  |
| 5 purg-primates  | 2305   | 165.0<br>-66.0    | 21             | -1.9640 | 0.0495*  | 15<br>-6                | 0.0784   |
| 6 batodon-lipoty | 2319   | 350.0<br>-28.0    | 27             | -4.4264 | <0.0001* | 25<br>-2                | <0.0001* |
| 7 gyp-lep-lipoty | 2316   | 1220.0<br>-610.0  | 60             | -2.5820 | 0.0098*  | 40<br>-20               | 0.0142*  |
| 8 dec-euarc      | 2315   | 360.0<br>-75.0    | 29             | -3.5282 | 0.0004*  | 24<br>-5                | 0.0005*  |
| 9 dec-euarc-purg | 2319   | 609.0<br>-171.0   | 39             | -3.4284 | 0.0006*  | 30<br>-9                | 0.0014*  |
| 10 cimolest-car  | 2330   | 1592.5<br>-487.5  | 64             | -4.2500 | <0.0001* | 49<br>-15               | <0.0001* |
| 11 con-paenungu  | 2326   | 1861.5<br>-766.5  | 72             | -3.5355 | 0.0004*  | 51<br>-21               | 0.0006*  |
| 12 zhe-car-con-c | 2321   | 976.0<br>-129.5   | 36             | -3.6667 | 0.0002*  | 29<br>-7                | 0.0005*  |
| 13 protox-con-c  | 2303   | 270.0<br>-165.0   | 29             | -1.2999 | 0.1936   | 18<br>-11               | 0.2649   |

\* Wilcoxon signed-ranks test statistic is the smaller of the absolute values of the two rank sums.

\*\* Approximate probability of getting a more extreme test statistic under the null hypothesis of no difference between the two trees (two-tailed test). Asterisked values in table (if any) indicate significant difference at  $P < 0.05$ . Consult a table for critical values of Wilcoxon rank sum when  $N$  is 25 or less.

#NEXUS  
BEGIN TREES;

## TRANSLATE

1 Nanolestes,  
2 Peramus,  
3 Vincelestes,  
4 Kielantherium,  
5 Deltatheridium,  
6 Mayulestes,  
7 Pucadelphys,  
8 Eomaia,  
9 Prokennalestes,  
10 Murtoilestes,  
11 Bobolestes,  
12 Montanalestes,  
13 Paranyctoides,  
14 Eozhelestes,  
15 Sheikhdzheilia,  
16 Alosteria,  
17 Lainodon,  
18 Avitotherium,  
19 Gallolestes,  
20 Parazhelestes,  
21 Aspanlestes,  
22 Zhelestes,  
23 Cimolestes,  
24 Maelestes,  
25 Batodon,  
26 Bulaklestes,  
27 Daulestes,  
28 Uchkudukodon,  
29 Kennalestes,  
30 Asioryctes,  
31 Ukhaatherium,  
32 Deccanolestes,  
33 Kulbeckia,  
34 Zhangolestes,  
35 Alymlestes,  
36 Zalambdalestes,  
37 Barunlestes,  
38 Gypsonictops,  
39 Leptictis,  
40 Purgatorius,  
41 Protungulatum,  
42 Oxyprimus,  
43 Vulpavus,  
44 Miacis,  
45 Gujaratia,  
46 Hyopsodus,  
47 Meniscotherium,  
48 Phenacodus,  
49 Ptilocercus,  
50 Plesiadapis,  
51 Northarctus,  
52 Adapis,  
53 Tribosphenomys,

54 Paramys,  
 55 Rhombomylus,  
 56 Gomphos,  
 57 Mimotona,  
 58 Blarina,  
 59 Erinaceus,  
 60 Solenodon,  
 61 Eoryctes,  
 62 Potamogale,  
 63 Orycteropus,  
 64 Rhynchocyon,  
 65 Procavia,  
 66 Moeritherium,  
 67 Chaetophractus,  
 68 Bradypus,  
 69 Tamandua

;

```
TREE 'best' = [&R]
(1,(2,(3,(4,((5,(6,7)),((8,9),10),(11,(12,(((13,14),(((23,(24,25)),((26,(27,28)),(29,(30,31))))),(32,((33,(34,(35,36,37))),((38,39),(40,(41,42))),((43,44),(45,(46,(47,48))))),(49,(50,(51,52))),((53,54),(55,(56,57))))),((58,59),(60,(61,62))),((63,64),(65,66)),(67,(68,69))))))));
(15,(16,17,((18,19),(20,(21,22)))))))););
TREE 'zalam-glires' = [&R]
(1,(2,(3,(4,((5,(6,7)),((8,9),10),(11,(12,(((13,14),(((23,(24,25)),((26,(27,28)),(29,(30,31))))),(32,((38,39),(40,(41,42))),((43,44),(45,(46,(47,48))))),(49,(50,(51,52))),((33,(34,(35,36,37))),((53,54),(55,(56,57))))),((58,59),(60,(61,62))),((63,64),(65,66)),(67,(68,69))))))));
(15,(16,17,((18,19),(20,(21,22)))))))););
TREE 'zalam-lago' = [&R]
(1,(2,(3,(4,((5,(6,7)),((8,9),10),(11,(12,(((13,14),(((23,(24,25)),((26,(27,28)),(29,(30,31))))),(32,((38,39),(40,(41,42))),((43,44),(45,(46,(47,48))))),(49,(50,(51,52))),((53,54),(55,(33,(34,(35,36,37))),56,57))))),((58,59),(60,(61,62))),((63,64),(65,66)),(67,(68,69))))))));
(15,(16,17,((18,19),(20,(21,22)))))))););
TREE 'zhe-ungulates' = [&R]
(1,(2,(3,(4,((5,(6,7)),((8,9),10),(11,(12,(((13,14),(((23,(24,25)),((26,(27,28)),(29,(30,31))))),(32,((33,(34,(35,36,37))),((38,39),(40,((41,42),(43,44),(45,(46,(47,48))))),(49,(50,(51,52))),((53,54),(55,(56,57))))),((58,59),(60,(61,62))),((63,64),(65,66)),(67,(68,69))))))));
(15,(16,17,((18,19),(20,(21,22)))))))););
TREE 'purg-primates' = [&R]
(1,(2,(3,(4,((5,(6,7)),((8,9),10),(11,(12,(((13,14),(((23,(24,25)),((26,(27,28)),(29,(30,31))))),(32,((33,(34,(35,36,37))),((38,39),(41,42),(43,44),(45,(46,(47,48))))),(49,(40,(50,(51,52))),((53,54),(55,(56,57))))),((58,59),(60,(61,62))),((63,64),(65,66)),(67,(68,69))))))));
(15,(16,17,((18,19),(20,(21,22)))))))););
TREE 'batodon-lipoty' = [&R]
(1,(2,(3,(4,((5,(6,7)),((8,9),10),(11,(12,(((13,14),(((23,24),(26,(27,28)),(29,(30,31))))),(32,((33,(34,(35,36,37))),((38,39),(40,(41,42))),((43,44),(45,(46,(47,48))))),(49,(50,(51,52))),((53,54),(55,(56,57))))),((58,59),(60,(61,62)),25,((63,64),(65,66)),(67,(68,69))))))));
(15,(16,17,((18,19),(20,(21,22)))))))););
TREE 'gyp-lep-lipoty' = [&R]
(1,(2,(3,(4,((5,(6,7)),((8,9),10),(11,(12,(((13,14),(((23,(24,25)),((26,(27,28)),(29,(30,31))))),(32,((33,(34,(35,36,37))),((40,(41,42))),((43,44),(45,(46,(47,48))))),(49,(50,(51,52))),((53,54),(55,(56,57))))),((58,59),(60,(61,62))),((63,64),(65,66)),(67,(68,69))))))));
(15,(16,17,((18,19),(20,(21,22)))))))););
```

```

(58,59),(60,(61,62)),(38,39),(((63,64),(65,66)),(67,(68,69)))))))))
,(15,(16,17,((18,19),(20,(21,22)))))))))
TREE 'dec-euarc' = [&R]
(1,(2,(3,(4,((5,(6,7)),((8,9),10),(11,(12,((13,14),((23,(24,25)),((2
6,(27,28)),(29,(30,31))))),((33,(34,(35,36,37))),((38,39),(40,(41,42)),
((43,44),(45,(46,(47,48))))),(((49,(50,(51,52))),32),(53,54),(55,(56,
57))))),((58,59),(60,(61,62)),((63,64),(65,66)),(67,(68,69)))))))))
,(15,(16,17,((18,19),(20,(21,22)))))))))
TREE 'dec-euarc-purg' = [&R]
(1,(2,(3,(4,((5,(6,7)),((8,9),10),(11,(12,((13,14),((23,(24,25)),((2
6,(27,28)),(29,(30,31))))),((33,(34,(35,36,37))),((38,39),(41,42),((43
,44),(45,(46,(47,48))))),(((49,(50,(51,52))),40),32),(53,54),(55,(56,
57))))),((58,59),(60,(61,62)),((63,64),(65,66)),(67,(68,69)))))))))
,(15,(16,17,((18,19),(20,(21,22)))))))))
TREE 'cimolest-car' = [&R]
(1,(2,(3,(4,((5,(6,7)),((8,9),10),(11,(12,((13,14),((26,(27,28)),(29
,(30,31))),32,((33,(34,(35,36,37))),((38,39),(40,(41,42)),(((43,44),
(23,(24,25))),45,(46,(47,48))))),((49,(50,(51,52))),((53,54),(55,(56,5
7))))),((58,59),(60,(61,62)),((63,64),(65,66)),(67,(68,69)))))))))
,(15,(16,17,((18,19),(20,(21,22)))))))))
TREE 'con-paeungulu' = [&R]
(1,(2,(3,(4,((5,(6,7)),((8,9),10),(11,(12,((13,14),((23,(24,25)),((2
6,(27,28)),(29,(30,31))))),32,((33,(34,(35,36,37))),((38,39),(40,(41,4
2)),((43,44),45),((49,(50,(51,52))),((53,54),(55,(56,57))))),((58,59)
,(60,(61,62)),((63,64),(46,(47,48)),(65,66)),(67,(68,69)))))))))
,(15,(16,17,((18,19),(20,(21,22)))))))))
TREE 'zhe-car-con-c' = [&R]
(1,(2,(3,(4,((5,(6,7)),((8,9),10),(11,(12,((13,14),((23,(24,25)),((26
,(27,28)),(29,(30,31))))),32,((33,(34,(35,36,37))),((38,39),(40,(((43,
44),(41,42),(45,(46,(47,48))))),15,(16,17,((18,19),(20,(21,22))))),((
49,(50,(51,52))),((53,54),(55,(56,57))))),((58,59),(60,(61,62)),((6
3,64),(65,66)),(67,(68,69)))))))))
TREE 'protoxy-con-c' = [&R]
(1,(2,(3,(4,((5,(6,7)),((8,9),10),(11,(12,((13,14),((23,(24,25)),((2
6,(27,28)),(29,(30,31))))),32,((33,(34,(35,36,37))),((38,39),(40,(((43,
44),(41,42),(45,(46,(47,48))))),((49,(50,(51,52))),((53,54),(55,(56,5
7))))),((58,59),(60,(61,62)),((63,64),(65,66)),(67,(68,69)))))))))
,(15,(16,17,((18,19),(20,(21,22)))))))))

```

END;

### Part VIII. References

Andrews, C. W. 1906. A Descriptive Catalogue of the Tertiary Vertebrata of the Fayum, Egypt. British Museum (Natural History), London.

Archibald, J. D. 1982. A study of Mammalia and geology across the Cretaceous-Tertiary boundary in Garfield County, Montana. University of California Publications in Geological Sciences 122: 1-286.

Archibald, J. D. 1998. Archaic ungulates (“Condylarthra”). Pp. 292-329 in C. Janis, K. Scott, and L. Jacobs (editors), Evolution of Tertiary mammals of North America. Volume 1. Terrestrial Carnivores, Ungulates, and Ungulatelike Mammals. Cambridge University Press, Cambridge.

Archibald, J. D., and A. O. Averianov. 2001. *Paranyctoides* and allies from the Late Cretaceous of North America and Asia. Acta Palaeontologica Polonica 46: 533-551.

Archibald, J. D., and A. O. Averianov. 2003. The Late Cretaceous placental mammal *Kulbeckia*. Journal of Vertebrate Paleontology 23: 404-419.

Archibald, J. D., and A. P. Averianov. 2005. Mammalian faunal succession in the Cretaceous of the Kyzylkum Desert. Journal of Mammalian Evolution 12: 9-22.

Archibald, J. D., and A. O. Averianov. 2006. Late Cretaceous asioryctitherian eutherian mammals from Uzbekistan and phylogenetic analysis of Asioryctitheria. *Acta Palaeontologica Polonica* 51: 351-376.

Archibald, J. D., A. O. Averianov, and E. G. Ekdale. 2001. Late Cretaceous relatives of rabbits, rodents, and other extant eutherian mammals. *Nature* 414: 62-65.

Argot, C. 2002. Functional-adaptive anatomy of the hind limb anatomy of extant marsupials and the paleobiology of the Paleocene marsupials *Mayulestes ferox* and *Pucadelphys andinus*. *Journal of Morphology* 255: 279-300.

Asher, R. J., J. Meng, J. R. Wible, M. C. McKenna, G. W. Rougier, D. Dashzeveg, and M. J. Novacek. 2005. Stem Lagomorpha and the antiquity of Glires. *Science* 303: 1091-1094.

Asher, R. J., M. J. Novacek, and J. H. Geisler. 2003. Relationships of endemic African mammals and their fossil relatives based on morphological and molecular evidence. *Journal of Mammalian Evolution* 10: 131-194.

Averianov, A., and J. D. Archibald. 2003. Mammals from the Upper Cretaceous Aitym Formation, Kyzylkum Desert, Uzbekistan. *Cretaceous Research* 24: 171-191.



Averianov, A., and J. D. Archibald. 2005. Mammals from the mid-Cretaceous Khokzhakul Formation, Kyzylkum Desert, Uzbekistan. *Cretaceous Research* 26: 593-608.

Averianov, A. O., and L. A. Nessonov. 1995. A new Cretaceous mammal from the Campanian of Kazakhstan. *Neues Jahrbuch für Geologie und Paläontologie, Monatshefte* 1995: 65-74.

Averianov, A., and P. Skutschas. 2000. A eutherian mammal from the Early Cretaceous of Russia and biostratigraphy of the Asian Early Cretaceous vertebrate assemblages. *Lethaia* 33: 330-340.

Averianov, A. O., and P. P. Skutschas. 2001. A new genus of eutherian mammal from the Early Cretaceous of Transbaikalia, Russia. *Acta Palaeontologica Polonica* 46: 431-436.

Bajpai, S., V. V. Kapur, D. P. Das, B. N. Tiwari, N. Saravanan, and R. Sharma. 2005. Early Eocene land mammals from Vastan lignite mine, District Surat (Gujarat), western India. *Journal of the Paleontological Society of India* 50: 101-113.

Butler, P. M. 1980. The tupaiid dentition. Pp. 171-204 in W. P. Lockett (editor), *Comparative Biology and Evolutionary Relationships of Tree Shrews*. Plenum Press, New York.

Butler, P. M. 1990. Early trends in the evolution of tribosphenic molars. *Biological Reviews* 65: 529-552.

Butler, P. M., and W. A. Clemens. 2001. Dental morphology of the Jurassic holotherian mammal *Amphitherium*, with a discussion of the evolution of mammalian post-canine dental formulae. *Palaeontology* 44: 1-20.

Cavigelli, J.-P. 1997. A preliminary description of a *Leptictis* skeleton from the White River Formation of eastern Wyoming. *Tate Geological Museum Guidebook no. 2*: 101-118.

Cifelli, R. L. 1982. The petrosal structure of *Hyopsodus* with respect to that of some other ungulates, and its phylogenetic implications. *Journal of Paleontology* 56: 795-805.

Cifelli, R. L. 1990. Cretaceous mammals of southern Utah. IV. Eutherian mammals from the Wahweap (Aquilan) and Kaiparowits (Judithian) Formations. *Journal of Vertebrate Paleontology* 10: 346-360.

Cifelli, R. L. 1994. Therian mammals of the Terlingua local fauna (Judithian), Aguja Formation, Big Bend of the Rio Grande, Texas. *Contributions to Geology, University of Wyoming* 30: 117-136.

Cifelli, R. L. 1999. Tribosphenic mammal from the North American Early Cretaceous.

Nature 401: 363-366.

Cifelli, R. L. 2000. Counting premolars in early eutherian mammals. *Acta Palaeontologica Polonica* 45: 195-198.

Clemens, W. A., Jr. 1973. Fossil mammals of the type Lance Formation Wyoming – Part III. Eutheria and summary. *University of California Publications in Geological Sciences* 94: 1-102.

Clemens, W. A. 1974. *Purgatorius*, an early paromomyid primate (Mammalia). *Science* 184: 903-905.

Clemens, W. A. 1980. *Gallolestes pachymandibularis* (Theria, incertae sedis; Mammalia) from Late Cretaceous deposits in Baja California del Norte, Mexico. *PaleoBios* 33: 1-10.

Clemens, W. A. 2004. *Purgatorius* (Plesiadapiformes, Primates?, Mammalia), a Paleocene immigrant into northeastern Montana: stratigraphic occurrences and incisor proportions. In M. R. Dawson and J. A. Lillegraven (editors), *Fanfare for an Uncommon Paleontologist: Papers in Honor of Malcolm C. McKenna*. *Bulletin of Carnegie Museum of Natural History* 36: 3-13.

Clemens, W. A., and J. R. E. Mills. 1971. Review of *Peramus tenuirostris* Owen (Eupantotheria, Mammalia). Bulletin of the British Museum (Natural History, Geology 20: 89-113.

Clemens, W. A., and L. S. Russell. 1965. Mammalian fossils from the Upper Edmonton Formation. In Vertebrate Paleontology in Alberta. University of Alberta Bulletin in Geology 2: 32-40.

Colbert, E. H. 1941. A study of *Orycteropus gaudryi* from the island of Samos. Bulletin of the American Museum of Natural History 78: 305-351.

Court, N. 1994. The periotic of *Moeritherium* (Mammalia, Proboscidea): homology or homoplasy in the ear region of Tethytheria McKenna, 1975? Zoological Journal of the Linnean Society 112: 13-28.

Crompton, A.W., and Z. Kielan-Jaworowska. 1978. Molar structure and occlusion in Cretaceous therian mammals. In P.M. Butler and K.A. Joysey (editors), Development, Function and Evolution of Teeth: 249-287. Academic Press, London.

Decker, R. L., and F. S. Szalay. 1974. Origins and function of the pes in the Eocene Adapidae (Lemuriformes, Primates). Pp. 261-291 in F. A. Jenkins, Jr. (editor), Primate Locomotion. Academic Press, New York.

Ekdale, E. G., J. D. Archibald, and A. O. Averianov. 2004. Petrosal bones of placental mammals from the Late Cretaceous of Uzbekistan. *Acta Palaeontologica Polonica* 49: 161-176.

Evans, F. G. 1942. The osteology and relationships of the elephant shrews (Macroscelididae). *Bulletin of the American Museum of Natural History* 80: 85-125.

Evans, H. E., and G. C. Christensen. 1979. *Miller's Anatomy of the Dog*. W. B. Saunders, Philadelphia.

Fostowicz-Frelik, Ł., and Z. Kielan-Jaworowska. 2002. Lower incisor in zalambdalestid mammals (Eutheria) and its phylogenetic significance. *Acta Palaeontologica Polonica* 47: 177-180.

Fox, R. C. 1979. Mammals from the Upper Cretaceous Oldman Formation, Alberta. III. Eutheria. *Canadian Journal of Earth Sciences* 16: 114-125.

Fox, R. C. 1984. *Paranyctoides maleficus* (new specimens), an early eutherian mammal from the Cretaceous of Alberta. In R. M. Mengel (editor), *Papers in Vertebrate Paleontology Honoring Robert Warren Wilson*. Special Publication of Carnegie Museum of Natural History 9: 9-20.

Fox, R. C. 1989. The Wounded Knee local fauna and mammalian evolution near the Cretaceous-Tertiary boundary in Saskatchewan, Canada. *Palaeontographica Abteilung A* 208: 11-59.

Gaughran, G. R. L. 1954. A comparative study of the osteology and mycology of the cranial and cervical regions of the shrew, *Blarina brevicauda*, and the mole, *Scalopus aquaticus*. *Miscellaneous Publications, Museum of Zoology, University of Michigan* 80: 1-67.

Gazin, C. L. 1958. A review of the middle and upper Eocene primates of North America. *Smithsonian Miscellaneous Collections* 136: 1-112.

Gazin, C. L. 1965. A study of the early Tertiary condylarthran mammal *Meniscotherium*. *Smithsonian Miscellaneous Collections* 149: 1-98.

Gazin, C. L. 1968. A study of the Eocene condylarthran mammal *Hyposodus*. *Smithsonian Miscellaneous Collections* 153: 1-90.

Geisler, J. H. 2001. New morphological evidence for the phylogeny of Artiodactyla, Cetacea, and Mesonychidae. *American Museum Novitates* 3344: 1-53.

Geisler, J. H., and Z. Luo. 1998. Relationships of Cetacea to terrestrial ungulates and the evolution of cranial vasculature in Cete. Pp. 163-212 *in* J. G. M. Thewissen (editor), *The Emergence of Whales*. Plenum Press, New York.

Gheerbrant, E., and H. Astibia. 1994. Un nouveau mammifère du Maastrichtien de Laño (Pays Basque espagnol). *Comptes Rendus de l'Académie des Sciences, Paris, série II* 318: 1125-1131.

Gheerbrant, E., and H. Astibia. 1999. The Upper Cretaceous mammals from Laño (Spanish Basque country). *Estudios del Museo de Ciencias Naturales de Alava* 14: 295-323.

Gingerich, P. D. 1976. Cranial anatomy and evolution of early Tertiary Plesiadapidae (Mammalia, Primates). *University of Michigan Papers on Paleontology* 15: 1-141.

Gingerich, P. D. 1981. Cranial morphology and adaptations in Eocene Adapidae. I. Sexual dimorphism in *Adapis magnus* and *Adapis parisiensis*. *American Journal of Physical Anthropology* 56: 217-234.

Gingerich, P. D. 1983. Systematics of early Eocene Miacidae (Mammalia, Carnivora) in the Bighorn Basin and Clark's Fork Basin, Wyoming. *Contributions from the Museum of Paleontology, University of Michigan* 27: 87-128.

Gingerich, P. D., and R. D. Martin. 1981. Cranial morphology and adaptations in Eocene Adapidae. II. The Cambridge skull of *Adapis parisiensis*. *American Journal of Physical Anthropology* 56: 235-257.

Godinot, M., and G. V. R. Prasad. 1994. Discovery of Cretaceous arboreal eutherians. *Naturwissenschaften* 81: 79-81.

Goloboff, P. A., J. S. Farris, and K. C. Nixon. 2003. T. N. T. Tree analysis using new technology. Program and documentation available from the authors and at [www.zmuc.dk/public/phylogeny](http://www.zmuc.dk/public/phylogeny)

Gould, G. C. 1995. Hedgehog phylogeny (Mammalia, Erinaceidae) – the reciprocal illumination of the quick and the dead. *American Museum Novitates* 3131: 1-45.

Gould, G. C. 2001. The phylogenetic resolving power of discrete dental morphology among extant hedgehogs and the implications for their fossil record. *American Museum Novitates* 3340: 1-52.

Gregory, W. K. 1920. On the structure and relationships of *Notharctus*, an American Eocene primate. *Memoirs of the American Museum of Natural History* 3: 49-243.



Heinrich, R. E., and K. D. Rose. 1997. Postcranial morphology and locomotor behaviour of two early Eocene miacoid carnivorans, *Vulpavus* and *Didymictis*. *Palaeontology* 40: 279-305.

Horovitz, I. 2000. The tarsus of *Ukhaatherium nessovi* (Eutheria, Mammalia) from the Late Cretaceous of Mongolia: an appraisal of the evolution of the ankle in basal therians. *Journal of Vertebrate Paleontology* 20: 547-560.

Horovitz, I. 2003. Postcranial skeleton of *Ukhaatherium nessovi* (Eutheria, Mammalia) from the Late Cretaceous of Mongolia. *Journal of Vertebrate Paleontology* 23: 857-868.

Horovitz, I., and M. R. Sánchez-Villagra. 2003. A morphological analysis of marsupial mammal higher-level phylogenetic relationships. *Cladistics* 19: 181-212.

Ji, Q., Z.-X. Luo, C.-X. Yuan, J. R. Wible, J.-P. Zhang, and J. A. Georgi. 2002. The earliest eutherian mammal. *Nature* 416: 816-822.

Kielan-Jaworowska, Z. 1969. Preliminary data on the Upper Cretaceous eutherian mammals from Bayn Dzak, Gobi Desert. *Palaeontologia Polonica* 19: 171-191.

Kielan-Jaworowska, Z. 1975a. Possible occurrence of marsupial bones in Cretaceous eutherian mammals. *Nature* 255: 698-699.

Kielan-Jaworowska, Z. 1975b. Preliminary description of two new eutherian genera from the Late Cretaceous of Mongolia. *Palaeontologia Polonica* 33: 5-16.

Kielan-Jaworowska, Z. 1975c. Evolution of the therian mammals in the Late Cretaceous of Asia. Part I. Deltatheridiidae. *Palaeontologia Polonica* 33: 5-16.

Kielan-Jaworowska, Z. 1977. Evolution of the therian mammals in the Late Cretaceous of Asia. Part II. Postcranial skeleton in *Kennalestes* and *Asioryctes*. *Palaeontologia Polonica* 37: 65-83.

Kielan-Jaworowska, Z. 1978. Evolution of the therian mammals in the Late Cretaceous of Asia. Part III. Postcranial skeleton in *Zalambdalestidae*. *Palaeontologia Polonica* 38: 3-41.

Kielan-Jaworowska, Z. 1981. Evolution of the therian mammals in the Late Cretaceous of Asia. Part IV. Skull structure in *Kennalestes* and *Asioryctes*. *Palaeontologia Polonica* 42: 25-78.

Kielan-Jaworowska, Z. 1984a. Evolution of the therian mammals in the Late Cretaceous of Asia. Part V. Skull structure in *Zalambdalestidae*. *Palaeontologia Polonica* 46: 107-117.

Kielan-Jaworowska, Z., T. M. Bown, and J. A. Lillegraven. 1979. Eutheria. Pp. 221-258 in J. A. Lillegraven, Z. Kielan-Jaworowska, and W. A. Clemens (editors), *Mesozoic Mammals, The First Two-thirds of Mammalian History*. University of California Press, Berkeley.

Kielan-Jaworowska, Z., R. L. Cifelli, and Z.-X. Luo. 2004. *Mammals from the Age of Dinosaurs: Origins, Evolution, and Structure*. Columbia University Press, New York.

Kielan-Jaworowska, Z., and D. Dashzeveg. 1984. The lower jaw of an aegialodontid mammal from the Early Cretaceous of Mongolia. *Zoological Society of the Linnean Society* 82: 217-227.

Kielan-Jaworowska, Z., and D. Dashzeveg. 1989. Eutherian mammals from the Early Cretaceous of Mongolia. *Zoologica Scripta* 18: 347-355.

Kielan-Jaworowska, Z., R. L. Cifelli, and Z.-X. Luo. 2004. *Mammals from the Age of Dinosaurs: Origins, Evolution, and Structure*. Columbia University Press, New York.

Kielan-Jaworowska, Z., and B. A. Trofimov. 1980. Cranial morphology of the Cretaceous eutherian mammal *Barunlestes*. *Acta Palaeontologica Polonica* 25: 167-185.

Kielan-Jaworowska, Z., and B. A. Trofimov. 1981. A new occurrence of the Late Cretaceous eutherian mammal *Zalambdalestes*. *Palaeontologia Polonica* 26: 3-7.

Kitts, D. 1956. American *Hyracotherium* (Perissodactyla, Equidae). Bulletin of the American Museum of Natural History 110: 5-60.

Le Gros Clark, W. E. 1926. On the anatomy of the pen-tailed tree-shrew (*Ptilocercus lowii*). Proceedings of the Zoological Society of London 1926: 1179-1309.

Le Gros Clark, W. E., and C. F. Sonntag. 1926. A monograph of *Orycteropus afer*. III. The skull. The skeleton of the trunk and limbs. General summary. Proceedings of the Zoological Society of London 1926: 445-485.

Lessertisseur, J., and R. Saban. 1967a. Squelette axial. In P.-P. Grassé (editor), *Traité de zoologie* 16(1): 584-708. Masson, Paris.

Lessertisseur, J., and R. Saban. 1967b. Squelette appendiculaire. In P.-P. Grassé (editor), *Traité de zoologie* 16(1): 709-1078. Masson, Paris.

Li, C., and S. Ting. 1993. New cranial and postcranial evidence for the affinities of the eurymylids (Rodentia) and mimotonids (Lagomorpha). Pp. 151-158 in F. S. Szalay, M. J. Novacek, and M. C. McKenna (editors), *Mammal Phylogeny. Volume 2. Placentals*. Springer Verlag, New York.

Lillegraven, J. A. 1969. Latest Cretaceous mammals from the upper part of the Edmonton Formation of Alberta, Canada, and review of marsupial-placental dichotomy in mammalian evolution. The University of Kansas Paleontological Contributions Article 50 (Vertebrata 12): 1-122.

Lillegraven, J. A. 1972. Preliminary report on Late Cretaceous mammals from the El Gallo Formation, Baja California del Norte, Mexico. Natural History Museum of Los Angeles County, Contributions in Science 232: 1-11.

Lillegraven, J. A. 1976. A new genus of therian mammal from the Late Cretaceous "El Gallo Formation," Baja California, Mexico. Journal of Paleontology 50: 437-443.

Lillegraven, J. A., and M. C. McKenna. 1986. Fossil mammals from the "Mesaverde" Formation (Late Cretaceous, Judithian) of the Bighorn and Wind River Basins, Wyoming, with definitions of Late Cretaceous land-mammal "ages." American Museum Novitates 2840: 1-68.

Lofgren, D. L. 1994. The Bug Creek problem and the Cretaceous-Tertiary transition at McGuire Creek, Montana. University of California Publications in Geological Sciences 140: 1-185.

Lopatin, A.V., and A.O. Averianov. 2004. A new species of *Tribosphenomys* (Mammalia: Rodentiaformes) from the Paleocene of Mongolia. In S.G. Lucas and P.E.

Kondrashov (editors), *Paleogene Mammals*. New Mexico Museum of Natural History and Science Bulletin 26: 169-175.

Lopatin, A.V., and A.O. Averianov. 2006. An aegialodontid upper molar and the evolution of mammal dentition. *Science* 313: 1092.

Luckett, W. P. 1985. Superordinal and intraordinal affinities of rodents: developmental evidence from the dentition and placentation. Pp. 227-276 in W. P. Luckett and J.-L. Hartenberger (editors), *Evolutionary Relationships among Rodents: a Multidisciplinary Analysis*. New York: Plenum Press.

Luckett, W. P. 1993. An ontogenetic assessment of dental homologies in therian mammals. Pp. 182-205 in F. S. Szalay, M. J. Novacek, and M. C. McKenna (editors), *Mammal Phylogeny. Volume 1. Mesozoic Differentiation, Multituberculates, Monotremes, Early Therians, and Marsupials*. Springer-Verlag, New York.

Luo, Z. 1991. Variability of dental morphology and the relationships of the earliest arctocyonid species. *Journal of Vertebrate Paleontology* 11: 452-471.

Luo, Z.-X., Q. Ji, J. R. Wible, and C.-X. Yuan. 2003. A new tribosphenic mammal with implications for early metatherian evolution. *Science* 302: 1934-1940.

Luo, Z.-X., and J. R. Wible. 2005. A Late Jurassic digging mammal and early mammalian diversification. *Science* 308: 103-107.

MacIntyre, G. T. 1972. The trisulcate petrosal pattern of mammals. *In* T. Dobzhansky, M. K. Hecht, and W. C. Steere (editors). *Evolutionary Biology* 6: 275-303.

MacPhee, R. D. E. 1994. Morphology, adaptations, and relationships of *Plesiorcycteropus*, and a diagnosis of a new order of eutherian mammals. *Bulletin of the American Museum of Natural History* 220: 1-214.

MacPhee, R. D. E., and M. Cartmill. 1986. Basicranial structures and primate systematics. Pp. 219-275 *in* D. R. Swindler and J. Erwin (editors), *Comparative Primate Biology, Volume 1, systematics, evolution, and anatomy*. Alan R. Liss, Inc., New York.

Marshall, L. G., C. de Muizon, and D. Sigogneau-Russell. 1995. *Pucadelphys andinus* (Marsupialia, Mammalia) from the early Paleocene of Bolivia. *Mémoires du Museum national d'Histoire naturelle* 165: 1-164.

Martin, T. 2002. New stem-lineage representatives of Zatheria (Mammalia) from the Late Jurassic of Portugal. *Journal of Vertebrate Paleontology* 22: 332-348.

Matthew, W. D. 1909. The Carnivora and Insectivora of the Bridger Basin, middle Eocene. *Memoirs of the American Museum of Natural History* 9: 289-567.

Matthew, W. D. 1910. On the osteology and relationships of *Paramys* and the affinities of the Ischyromyidae. Bulletin of the American Museum of Natural History 28: 43-71.

Matthew, W. D. 1915. A revision of the lower Eocene Wasatch and Wind River faunas. I. Order Ferae (Carnivora). Suborder Creodonta. Bulletin of the American Museum of Natural History 34: 4-103.

McKenna, M. C., Z. Kielan-Jaworowska, and J. Meng. 2000. Earliest eutherian mammal skull, from the Late Cretaceous (Coniacian) of Uzbekistan. Acta Palaeontologica Polonica 45: 1-54.

Meng, J., and A. Wyss. 2001. The morphology of *Tribosphenomys* (Rodentiaformes, Mammalia): phylogenetic implications for basal Glires. Journal of Mammalian Evolution 8:1-71.

Meng, J. G. J. Bowen, J. Ye, P. L. Koch, S. Ting, Q. Li, and X. Jin. 2004. *Gomphos elkema* (Glires, Mammalia) from the Erlian Basin: evidence for the early Tertiary Bumbanian Land Mammal Age in Nei-Mongol, China. American Museum Novitates 3425: 1-24.

Meng, J., Y. Hu, and C. Li. 2003. The osteology of *Rhombomylus* (Mammalia, Glires):



implications for phylogeny and evolution of Glires. *Bulletin of the American Museum of Natural History* 275:1-247.

Mills, J. R. E. 1964. The dentitions of *Peramus* and *Amphitherium*. *Proceedings of the Linnean Society of London* 175: 117-133.

Moss-Salentijn, L. 1978. Vestigial teeth in the rabbit, rat and mouse; their relationships to the problem of lacteal dentitions. Pp. 13-29 in P. M. Butler and K. A. Joysey (editors), *Development, Function and Evolution of Teeth*. Academic Press, London.

Novacek, M. J. 1986a. The skull of leptictid insectivorans and the higher-level classification of eutherian mammals. *Bulletin of the American Museum of Natural History* 183: 1-112.

Novacek, M. J. 1986b. The primitive eutherian dental formula. *Journal of Vertebrate Paleontology* 6: 191-196.

Novacek, M. J., G. W. Rougier, J. R. Wible, M. C. McKenna, D. Dashzeveg, and I. Horovitz. 1997. Epipubic bones in eutherian mammals from the Late Cretaceous of Mongolia. *Nature* 389: 483-486.

Ooè, T. 1980. Développement embryonnaire des incisives chez le lapin (*Oryctolagus cuniculus* L.). *Interprétation de la formule dentaire*. *Mammalia* 44: 259-269.

Osborn, H. F. 1898. Remounted skeleton of *Phenacodus primaevus*. Comparison with *Euprotogonia*. Bulletin of the American Museum of Natural History 10: 159-164.

Patterson, B., W. Segall, W. D. Turnbull, and T. J. Gaudin. 1992. The ear region in xenarthrans (=Edentata: Mammalia). Part II. Pilosa (sloths, anteaters), palaeonodons, and a miscellany. Fieldiana, Geology 24: 1-79.

Prasad, G. V. R., and M. Godinot. 1994. Eutherian tarsal bones from the Late Cretaceous of India. Journal of Paleontology 68: 892-902.

Prasad, G. V. R., and A. Sahni. 1988. First Cretaceous mammal from India. Nature 332: 638-640.

Prasad, G. V. R., J. J. Jaeger, A. Sahni, E. Gheerbrant, and C. K. Khajuria. 1994. Eutherian mammals from the Upper Cretaceous (Maastrichtian) Intertrappean beds of Naskal, Andhra Pradesh, India. Journal of Vertebrate Paleontology 14: 260-277.

Radinsky, L. B. 1966. The adaptive radiation of the phenacodontid condylarths and the origin of the Perissodactyla. Evolution 20: 408-417.

- Rana, R. S., and G. P. Wilson. 2003. New Late Cretaceous mammals from the Intertrappean beds of Rangapur, India and paleobiogeographic framework. *Acta Palaeontologica Polonica* 48: 331-348.
- Reynolds, T. E. 1936. Two new insectivores from the lower Paleocene of New Mexico. *Journal of Paleontology* 10: 202-209.
- Rohlf, R. R., and F. J. Sokal. 1994. *Biometry*, 3<sup>rd</sup> edition. W. H. Freeman, New York.
- Rose, K. D. 1999. Postcranial skeleton of Eocene Leptictidae (Mammalia), and its implications for behavior and relationships. *Journal of Vertebrate Paleontology* 19: 355-372.
- Rose, K. D. in press. The postcranial skeleton of early Oligocene *Leptictis* (Mammalia: Leptictida), with a preliminary comparison to *Leptictidium* from the middle Eocene of Messel.
- Rose, K. D., and B. J. Chinnery. 2004. The postcranial skeleton of early Eocene rodents. *In* M. R. Dawson and J. A. Lillegraven (editors), *Fanfare for an Uncommon Paleontologist: Papers in Honor of Malcolm C. McKenna*. *Bulletin of Carnegie Museum of Natural History* 36: 211-244.

- Rougier, G. W. 1993. *Vincelestes neuquenianus* Bonaparte (Mammalia, Theria) un primitivo mamífero del Cretácico Inferior de la Cuenca Neuquina. Dissertation, University of Buenos Aires, 720 pp.
- Rougier, G. W., J. R. Wible, and J. A. Hopson. 1992. Reconstruction of the cranial vessels in the Early Cretaceous mammal *Vincelestes neuquenianus*: implications for the evolution of the mammalian cranial vascular system. *Journal of Vertebrate Paleontology* 12: 188-216.
- Rougier, G. W., J. R. Wible, and M. J. Novacek. 1998. Implications of *Deltatheridium* specimens for early marsupial history. *Nature* 396: 459-463.
- Rougier, G. W., J. R. Wible, and M. J. Novacek. 2004. New specimen of *Deltatheroides cretacicus* (Metatheria, Deltatheriidae) from the Late Cretaceous of Mongolia. In M. R. Dawson and J. A. Lillegraven (editors), *Fanfare for an Uncommon Paleontologist: Papers in Honor of Malcolm C. McKenna*. *Bulletin of Carnegie Museum of Natural History* 36: 245-266.
- Russell, D. E. 1964. Les mammifères paléocènes d'Europe. *Mémoires du Museum national d'Histoire naturelle, série C* 13: 1-324.
- Russell, D. E., J. G. M. Thewissen, and D. Sigogneau-Russell. 1983. A new dichobunid artiodactyls (Mammalia) from the Eocene of North-West Pakistan. Part II. Cranial

osteology. Proceedings of the Koninklijke Nederlandse Akademie van Wetenschappen, Series B 86: 285-300.

Sahni, A. 1972. The vertebrate fauna of the Judith River Formation, Montana. Bulletin of the American Museum of Natural History 147: 325-412.

Sánchez-Villagra, M. R., Y. Narita, and S. Kuratani. 2007. Thoracolumbar vertebral number: the first skeletal synapomorphy for afrotherian mammals. Systematics and Biodiversity 5: 1-7.

Sargis, E. J. 2001. A preliminary qualitative analysis of the axial skeleton of tupaiids (Mammalia, Scandentia): functional morphology and phylogenetic implications. Journal of Zoology, London 253: 473-483.

Sargis, E. J. 2002a. Functional morphology of the forelimb of tupaiids (Mammalia, Scandentia) and its phylogenetic implications. Journal of Morphology 253: 10-42.

Sargis, E. J. 2002b. Functional morphology of the hindlimb of tupaiids (Mammalia, Scandentia) and its phylogenetic implications. Journal of Morphology 254: 149-185.

Sargis, E. J. 2002c. The postcranial morphology of *Ptilocercus lowii* (Scandentia, Tupaiidae): an analysis of primatomorphan and volitantian characters. Journal of Mammalian Evolution 9: 137-160.

Sigogneau-Russell, D. 1999. Réévaluation des Peramura (Mammalia, Cladotheria) sur la base de nouveaux spécimens du Crétacé inférieur d'Angleterre et du Maroc.

Geodiversitas 21: 93-127.

Sigogneau-Russell, D., D. Dashzeveg, and D. E. Russell. 1992. Further data on *Prokennalestes* (Mammalia, Eutheria *inc. sed.*) from the Early Cretaceous of Mongolia.

Zoologica Scripta 21: 205-209.

Simpson, G. G. 1928. A catalogue of the Mesozoic Mammalia in the geological department of the British Museum. British Museum (Natural History), London.

Simpson, G. G. 1932. Enamel on the teeth of an Eocene edentate. American Museum

Novitates 567: 1-4.

Simpson, G. G. 1935. The Tiffany fauna, upper Paleocene. II. Structure and relationships of *Plesiadapis*. American Museum Novitates 816: 1-30.

Sloan, R. E., and L. Van Valen. 1965. Cretaceous mammals from Montana. Science 148

220-227.

Stehlin, H. G. 1912. Die Säugetiere des schweizerischen Eocaens. VII (1): *Adapis*.

Abhandlungen der schweizerischen päläontologischen Gesellschaft 38: 1165-1298.

Storer, J. E. 1991. The mammals of the Gryde local fauna, Frenchman Formation (Maastrichtian: Lancian), Saskatchewan. *Journal of Vertebrate Paleontology* 11: 350-369.

Swofford, D. L. 2002. *Phylogenetic Analysis Using Parsimony (\*and Other Methods)*, version 4.0b10. Sinauer, Sunderland, Massachusetts.

Szalay, F. S., and R. L. Decker. 1974. Origins, evolution, and function of the tarsus in Late Cretaceous eutherians and Paleocene primates. Pp. 223-254 *in* F. A. Jenkins (editor), *Primate Locomotion*. Academic Press, New York.

Szalay, F. S., and G. Drawhorn. 1980. Evolution and diversification of the Archonta in an arboreal milieu. Pp. 133-169 *in* W. P. Luckett (editor), *Comparative Biology and Evolutionary Relationships of Tree Shrews*. Plenum Press, New York.

Szalay, F. S., I. Tattersall, and R. L. Decker. 1975. Phylogenetic relationships of *Plesiadapis* – postcranial evidence. *Contributions to Primatology* 5: 136-166.

Tassy, P. 1981. Le crâne de *Moeritherium* (Proboscidea, Mammalia) de l'Éocène de Dor el Talha (Libye) et le problème de la classification phylogénétique du genre dans les Tethytheria McKenna, 1975. *Bulletin, Museum National d'Histoire Naturelle, Paris*, 4e series, 3, section C 1: 87-147.

Thewissen, J. G. M. 1990. Evolution of Paleocene and Eocene Phenacodontidae (Mammalia, Condylarthra). University of Michigan Papers on Paleontology 29: 1-107.

Thewissen, J. G. M., and P. D. Gingerich. 1989. Skull and endocranial cast of *Eoryctes melanus*, a new palaeoryctid (Mammalia: Insectivora) from the early Eocene of western North America. Journal of Vertebrate Paleontology 9: 459-470.

Thewissen, J. G. M., and S. T. Hussain. 1990. Postcranial osteology of the most primitive artiodactyls *Diacodexis pakistanensis* (Dichobunidae). Anatomy, Histology, Embryology 19: 37-48.

Thewissen, J. G. M., D. E. Russell, P. D. Gingerich, and S. T. Hussain. 1983. A new dichobunid artiodactyls (Mammalia) from the Eocene of North-West Pakistan. Dentition and classification. Proceedings of the Koninklijke Nederlandse Akademie van Wetenschappen, Series B 86: 153-180.

Thewissen, J. G. M., E. M. Williams, L. J. Roe, and S. T. Hussain. 2001. Skeletons of terrestrial cetaceans and the relationships of whales to artiodactyls. Nature 413: 277-281.

Van Valen, L. 1964. A possible origin for rabbits. Evolution 18: 484-491.

Van Valen, L. 1966. Deltatheridia, a new order of mammals. Bulletin of the American Museum of Natural History 132: 1-126.



Van Valen, L. 1994. The origin of plesiadapid primates and the nature of *Purgatorius*.  
Evolutionary Monographs 15: 1-79.

Van Valen, L., and R. E. Sloan. 1965. The earliest primates. *Science* 150: 743-745.

Wahlert, J.H. 2000. Morphology of the auditory region in *Paramys copei* and other  
Eocene rodents from North America. *American Museum Novitates*, 3307:1-16.

Wang, X., and R. H. Tedford. 1994. Basicranial anatomy and phylogeny of primitive  
canids and closely related miacids (Carnivora: Mammalia). *American Museum Novitates*  
3092: 1-34.

West, R. M. 1979. Paleontology and geology of the Bridger Formation, southern Green  
River basin, southwestern Wyoming. Part 3. Notes on *Hyopsodus*. *Contributions in*  
*Biology and Geology, Milwaukee Public Museum* 25: 1-52.

Wible, J. R., and T. J. Gaudin. 2004. On the cranial osteology of the yellow armadillo  
*Euphractus sexcinctus* (Dasypodidae, Xenarthra, Placentalia). *Annals of Carnegie*  
*Museum* 73: 117-196.

Wible, J. R., and J. A. Hopson. 1993. Basicranial evidence for early mammal phylogeny.  
Pp. 45-62 in F. S. Szalay, M. J. Novacek, and M. C. McKenna (editors), *Mammal*

Phylogeny, Volume 1. Mesozoic Differentiation, Multituberculates, Monotremes, Early Therians, and Marsupials. Springer Verlag, New York.

Wible, J. R., M. J. Novacek, and G. W. Rougier. 2004. New data on the skull and dentition in the Mongolian Late Cretaceous eutherian mammal *Zalambdalestes*. Bulletin of the American Museum of Natural History 281: 1-144.

Wible, J. R., G. W. Rougier, M. J. Novacek, and M. C. McKenna. 2001. Earliest eutherian ear region: a petrosal of *Prokennalestes* from the Early Cretaceous of Mongolia. American Museum Novitates 3322: 1-44.

Wible, J. R., Y.-Q. Wang, C.-K. Li, and M. R. Dawson. 2005. Cranial anatomy and relationships of a new ctenodactyloid (Mammalia, Rodentia) from the early Eocene of Hubei Province, China. Annals of Carnegie Museum 74: 91-150.

Williamson, T. E., and S. G. Lucas. 1992. *Meniscotherium* (Mammalia, "Condylarthra") from the Paleocene-Eocene of western North America. Bulletin of the New Mexico Museum of Natural History and Science 1: 1-75.

Wood, A.E. 1962. The early Tertiary rodents of the family Paramyidae. Transactions of the American Philosophical Society, new series 52:1-261.

Wood, C. B., and W. A. Clemens. 2001. A new specimen and a functional reassociation of the molar dentition of *Batodon tenuis* (Placentalia, incertae sedis), latest Cretaceous (Lancian), North America. *Bulletin of the Museum of Comparative Zoology* 156: 99-118.

Zack, S. P., T. A. Penkrot, J. I. Bloch, and K. D. Rose. 2005. Affinities of ‘hyopsodontids’ to elephant shrews and a Holarctic origin of Afrotheria. *Nature* 434: 497-501.

Zan, S., C. B. Wood, G. W. Rougier, L. Jin, J. Chen, and C. R. Schaff. 2006. A new “middle” Cretaceous zalambdalestids mammal, from a new locality in Jilin Province, northeastern China. *Journal of the Paleontological Society of Korea* 22: 153-172.
